# Supplementary material for: Benefits of not smoking during pregnancy for Australian Aboriginal and Torres Strait Islander women and their babies: a retrospective cohort study using linked data
Source: PubMed Central journal article supplement — BMJ Open. 2019 Nov 21;9(11):e032763. doi: 10.1136/bmjopen-2019-032763 (PMC6887048; doi:10.1136/bmjopen-2019-032763), 2019-11-21
Supplement: bmjopen-2019-032763.draft_revisions.pdf [file bmjopen-2019-032763.draft_revisions.pdf]

# BMJ Open

BMJ Open is committed to open peer review. As part of this commitment we make the peer review history of every article we publish publicly available.

When an article is published we post the peer reviewers' comments and the authors' responses online. We also post the versions of the paper that were used during peer review. These are the versions that the peer review comments apply to.

The versions of the paper that follow are the versions that were submitted during the peer review process. They are not the versions of record or the final published versions. They should not be cited or distributed as the published version of this manuscript.

BMJ Open is an open access journal and the full, final, typeset and author-corrected version of record of the manuscript is available on our site with no access controls, subscription charges or pay-per-view fees (<http://bmjopen.bmj.com>).

If you have any questions on BMJ Open's open peer review process please email [info.bmjopen@bmj.com](mailto:info.bmjopen@bmj.com)

# BMJ Open

## Benefits of not smoking during pregnancy for Australian Aboriginal and Torres Strait Islander women and their babies: a retrospective cohort study using linked data

|                               |                                                                                                                                                                                                                                                                                                                                                                                                                                                                                                                                                                                                                                                                                                                                                                                                                                                                                                                                                                                                                                                                                                                                                                                                                                                                                                                                                            |
|-------------------------------|------------------------------------------------------------------------------------------------------------------------------------------------------------------------------------------------------------------------------------------------------------------------------------------------------------------------------------------------------------------------------------------------------------------------------------------------------------------------------------------------------------------------------------------------------------------------------------------------------------------------------------------------------------------------------------------------------------------------------------------------------------------------------------------------------------------------------------------------------------------------------------------------------------------------------------------------------------------------------------------------------------------------------------------------------------------------------------------------------------------------------------------------------------------------------------------------------------------------------------------------------------------------------------------------------------------------------------------------------------|
| Journal:                      | <i>BMJ Open</i>                                                                                                                                                                                                                                                                                                                                                                                                                                                                                                                                                                                                                                                                                                                                                                                                                                                                                                                                                                                                                                                                                                                                                                                                                                                                                                                                            |
| Manuscript ID                 | bmjopen-2019-032763                                                                                                                                                                                                                                                                                                                                                                                                                                                                                                                                                                                                                                                                                                                                                                                                                                                                                                                                                                                                                                                                                                                                                                                                                                                                                                                                        |
| Article Type:                 | Research                                                                                                                                                                                                                                                                                                                                                                                                                                                                                                                                                                                                                                                                                                                                                                                                                                                                                                                                                                                                                                                                                                                                                                                                                                                                                                                                                   |
| Date Submitted by the Author: | 06-Jul-2019                                                                                                                                                                                                                                                                                                                                                                                                                                                                                                                                                                                                                                                                                                                                                                                                                                                                                                                                                                                                                                                                                                                                                                                                                                                                                                                                                |
| Complete List of Authors:     | <p>McInerney, Carol; The University of Sydney Northern Clinical School, Women and Babies Research; New South Wales Ministry of Health, NSW Biostatistics Training Program</p> <p>Ibiebele, Ibinabo; The University of Sydney Northern Clinical School, Women and Babies Research; Northern Sydney Local Health District, Kolling Institute</p> <p>Ford, Jane; The University of Sydney Northern Clinical School, Women and Babies Research; Northern Sydney Local Health District, Kolling Institute</p> <p>Randall, Deborah; The University of Sydney Northern Clinical School, Women and Babies Research; Northern Sydney Local Health District, Kolling Institute</p> <p>Morris, Jonathan; The University of Sydney Northern Clinical School, Women and Babies Research; Royal North Shore Hospital, Obstetrics and Gynaecology</p> <p>Meharg, David; The University of Sydney Faculty of Health Sciences; The University of Sydney Poche Centre for Indigenous Health</p> <p>Mitchell, Jo ; New South Wales Ministry of Health, Centre for Population Health</p> <p>Milat, Andrew; New South Wales Ministry of Health, Centre for Epidemiology and Evidence</p> <p>Torvaldsen, Siranda; The University of Sydney Northern Clinical School, Women and Babies Research; University of New South Wales School of Public Health and Community Medicine</p> |
| Keywords:                     | Pregnancy, smoking, Aboriginal health, preterm birth, stillbirth, linked data                                                                                                                                                                                                                                                                                                                                                                                                                                                                                                                                                                                                                                                                                                                                                                                                                                                                                                                                                                                                                                                                                                                                                                                                                                                                              |
|                               |                                                                                                                                                                                                                                                                                                                                                                                                                                                                                                                                                                                                                                                                                                                                                                                                                                                                                                                                                                                                                                                                                                                                                                                                                                                                                                                                                            |

SCHOLARONE™  
Manuscripts

# Benefits of not smoking during pregnancy for Australian Aboriginal and Torres Strait Islander women and their babies: a retrospective cohort study using linked data

**Carol McInerney**<sup>1,2</sup>

Biostatistician [cmci0455@uni.sydney.edu.au](mailto:cmci0455@uni.sydney.edu.au)

**Ibinabo Ibiebele**<sup>1,3</sup>

Research Fellow [ibinabo.ibiebele@sydney.edu.au](mailto:ibinabo.ibiebele@sydney.edu.au)

**Jane Ford**<sup>1,3</sup>

Principal Research Fellow [jane.ford@sydney.edu.au](mailto:jane.ford@sydney.edu.au)

**Deborah Randall**<sup>1,3</sup>

Senior Research Fellow [deborah.randall@sydney.edu.au](mailto:deborah.randall@sydney.edu.au)

**Jonathan Morris**<sup>1,4</sup>

Professor of Obstetrics and Gynaecology [jonathan.morris@sydney.edu.au](mailto:jonathan.morris@sydney.edu.au)

**David Meharg**<sup>5,6</sup>

Research Associate [david.meharg@sydney.edu.au](mailto:david.meharg@sydney.edu.au)

**Jo Mitchell**<sup>7</sup>

Executive Director [jo.mitchell@health.nsw.gov.au](mailto:jo.mitchell@health.nsw.gov.au)

**Andrew Milat**<sup>8</sup>

Director [andrew.milat@health.nsw.gov.au](mailto:andrew.milat@health.nsw.gov.au)

**Siranda Torvaldsen**<sup>1,9</sup>

Corresponding author

Principal Research Fellow [siranda.torvaldsen@sydney.edu.au](mailto:siranda.torvaldsen@sydney.edu.au)

<sup>1</sup> The University of Sydney Northern Clinical School, Women and Babies Research, St Leonards, New South Wales, Australia

<sup>2</sup> NSW Biostatistics Training Program, NSW Ministry of Health, Australia

<sup>3</sup> Northern Sydney Local Health District, Kolling Institute, New South Wales, Australia

<sup>4</sup> Department of Obstetrics and Gynaecology, Royal North Shore Hospital, Australia

<sup>5</sup> The University of Sydney, Faculty of Health Sciences, Sydney, New South Wales, Australia.

<sup>6</sup> Poche Centre for Indigenous Health, The University of Sydney, Sydney, New South Wales, Australia.

<sup>7</sup> Centre for Population Health, NSW Ministry of Health, Sydney, Australia

<sup>8</sup> Centre for Epidemiology and Evidence, NSW Ministry of Health, Sydney, Australia

<sup>9</sup> School of Public Health and Community Medicine, UNSW Sydney, Australia

## Abstract

### Objectives

To provide relevant evidence for targeted smoking cessation policy, the aim of this study was to compare pregnancy outcomes of Aboriginal mothers who reported *not* smoking during pregnancy with Aboriginal mothers who reported smoking during pregnancy.

### Design

Population based retrospective cohort study using linked data.

### Setting

New South Wales, the most populated Australian state.

### Population

18,154 singleton babies born to 13,477 Aboriginal mothers between 2010–2014 were identified from routinely collected New South Wales datasets. Aboriginality was determined from birth records and from four linked datasets through an Enhanced Reporting of Aboriginality algorithm.

### Exposure

*Not* smoking at any time during pregnancy.

### Main outcome measures

Unadjusted and adjusted relative risks and 95% confidence intervals from modified Poisson regression were used to examine associations between not smoking during pregnancy and maternal and perinatal outcomes including severe morbidity, inter-hospital transfer, perinatal death, preterm birth and small-for-gestational age.

### Results

Compared to women who smoked during pregnancy (n=8,919), those who did not smoke (n=9,235) had a lower risk of being transferred to another hospital (aRR=0.76, 95%CI 0.66–0.89). Compared with babies born to mothers who smoked during pregnancy, babies born to non-smoking mothers had a lower risk of all adverse perinatal outcomes including perinatal death (aRR=0.58, 95%CI 0.44–0.76), preterm birth (aRR=0.58, 95%CI 0.53–0.64) and being born small-for-gestational age (aRR=0.35, 95%CI 0.32–0.39).

### Conclusions

Babies born to women who did not smoke during pregnancy had a lower risk of all adverse perinatal outcomes. Rates of adverse outcomes among Aboriginal non-smokers were similar to those among the general population. These results highlight why effective smoking cessation programs are so urgently required for this population.

1  
2  
3  
4 **Article summary**  
5

6 **Strengths and limitations of this study**  
7

- 8 • The first study to examine the association between *not* smoking in pregnancy and pregnancy  
9 outcomes among Aboriginal women
- 10 • A large population-based cohort study using whole-of-population linked data
- 11 • No data on alcohol consumption nor history and heaviness of smoking were available  
12  
13  
14

15  
16  
17  
18  
19  
20  
21  
22  
23  
24  
25  
26  
27  
28  
29  
30  
31  
32  
33  
34  
35  
36  
37  
38  
39  
40  
41  
42  
43  
44  
45  
46  
47  
48  
49  
50  
51  
52  
53  
54  
55  
56  
57  
58  
59  
60

For peer review only

## Introduction

In 2008 the Australian federal, state and territory governments committed to reducing the national adult daily smoking rate by 2018, including halving the Aboriginal adult smoking rate.(1) Although smoking rates have substantially declined over this time, they remain high among pregnant Aboriginal women. In 2016, 41% of all pregnant Aboriginal women reported smoking at some time during their pregnancy compared to just 7% of non-Aboriginal women.(2) Smoking during pregnancy is the ‘most important preventable risk factor for maternal and infant health’(3), thus smoking cessation for pregnant Aboriginal women remains a key priority for New South Wales (NSW) Health.(4) For the purposes of this study, Aboriginal and/or Torres Strait Islander people were considered together in one group. The reason for this was the small proportion of Torres Strait Islander people living in NSW (an estimated 2.6% of all females of Aboriginal and/or Torres Strait Islander descent(5))and that some people were recorded as both. We respectfully use the term Aboriginal as Aboriginal people are the original inhabitants of NSW.(6)

Australia’s anti-tobacco campaigns and smoking cessation strategies are among the most comprehensive in the world, and there is growing evidence that programs specifically targeted to Aboriginal Australians are more effective.(7) There have been several campaigns to promote smoking cessation among pregnant Aboriginal mothers with varying efficacy.(8) To date these have been grounded in evidence from a general population.

Although the benefits of not smoking during pregnancy are well established (9-13), no previous studies have demonstrated associations between not smoking in pregnancy and positive pregnancy outcomes *among* Aboriginal women. This study aims to compare pregnancy outcomes of mothers who reported not smoking during pregnancy with those who reported any smoking during pregnancy from the Aboriginal population of NSW. Findings from this study will provide the most relevant evidence to date for pregnant Aboriginal women.

## Methods

### Study population and data sources

The study population consisted of all singleton babies born to Aboriginal women residing in NSW between 1 January 2010 and 31 December 2014 and their mothers. This population-based retrospective cohort study used linked data from routinely collected NSW datasets. The study population was identified from all records in the NSW Perinatal Data Collection (‘birth data’) for the period 1 January 2010 to 31 December 2014. All births in the population, including births at NSW public and private hospitals and home births are recorded in the birth data. This surveillance system includes all live births and stillbirths of at least 400 grams birthweight or at least 20 weeks gestation.(14)

All deaths within NSW are registered in the Registry of Births, Deaths and Marriages and fact of death was retrieved from these data between 1 January 2010 and 31 December 2015. Public and private hospital admission records were drawn from the NSW Admitted Patient Data Collection (‘hospital data’) for admissions from 1 September 2009 to 31 December 2014. An additional 4 months of hospital data

1  
2  
3 were retrieved prior to the start of the study period to allow for admissions to hospital for births early in  
4 2010. Diagnoses coded in the hospital data are applied according to the International Classification of  
5 Diseases, Australian Modification (ICD-10-AM). Records within and across all datasets were  
6 probabilistically linked using personal identifiers by the NSW Centre for Health Record Linkage with an  
7 estimated false linkage rate of less than 5 per 1,000 records.<sup>(15)</sup> Hospital birth records were those  
8 where the birth was recorded to have occurred between the mother's admission and discharge dates  
9 using the linked birth data. It's estimated that 96% of records from the birth data link to the mother's  
10 and infant's hospital records from the birth.<sup>(16)</sup>  
11  
12  
13

14 Aboriginal women were defined as those who were recorded as Australian Aboriginal in the birth data  
15 or who were assigned Aboriginal status according to the Enhanced Reporting of Aboriginality (ERA)  
16 algorithm.  
17  
18

### 19 Enhanced Reporting of Aboriginality (ERA)

20 It is widely acknowledged that Aboriginal status is under-recorded on routinely collected health datasets  
21 nationwide.<sup>(17)</sup> Enhancement of reporting of Aboriginal people using linked records creates a  
22 statistical construct that results in improved information about Aboriginal people. It does not define a  
23 person as being Aboriginal, nor does it replace efforts to improve the overall quality of recording  
24 Aboriginal status at the point of care.  
25  
26

27 Information surrounding individuals' Aboriginal status was pooled via linkage of the birth data, NSW  
28 Registry of Births, Deaths and Marriages birth registrations, hospital data and the NSW Emergency  
29 Department Data Collection. Using this information, a weight of evidence surrounding a woman's  
30 Aboriginal status was determined by a multistage median algorithm.<sup>(18)</sup> Since multiple datasets were  
31 used and some women had multiple records in each of these datasets, the algorithm initially assigned a  
32 separate status for each woman and dataset. Aboriginal or Torres Strait Islander status was assigned to  
33 a mother if: one or two linked records were available and at least one reported her as Aboriginal; three  
34 or more linked records were available and at least two reported her as Aboriginal. A comparable  
35 algorithm using dataset-specific statuses instead of records was used to determine the inclusion of each  
36 woman in the study population.  
37  
38  
39  
40

41 The enhanced reporting of Aboriginality is a technique used by many research groups.<sup>(19-21)</sup> Although  
42 this combination of datasets and algorithm has not been used before, similar methods have been found  
43 to minimise the risk of incorrect inclusion while capturing more women than simply relying on a single  
44 record.<sup>(22)</sup> Details on the algorithm, the data used and the mothers identified through the ERA have  
45 been described in more detail elsewhere.  
46  
47  
48

### 49 Exposure

50 The exposure of interest for this study was not smoking at any time during pregnancy. Mothers who  
51 reported not smoking during pregnancy will henceforth be referred to as non-smokers and those who  
52 reported any smoking during pregnancy are referred to as smokers. To increase ascertainment, birth  
53 data and mother's hospital birth record(s) were used to assign smoking status. If the birth data indicated  
54 that a mother smoked at any time during her pregnancy and/or recorded her as a current smoker within  
55 the hospital birth record(s) (according to the ICD-10-AM diagnosis codes Z72.0 and F17) then she was  
56  
57  
58

1  
2  
3 considered to be a smoker. The sensitivity and specificity of current smoking from the most recent  
4 separation in the hospital data is estimated to be 58.5% and 98.4% respectively.(23) Where a mother  
5 had multiple hospital records associated with the birth and those records contradicted each other  
6 according to smoking status, her smoking status defaulted to that recorded in the birth data.  
7  
8

### 9 Outcomes

10 Maternal outcomes were identified using the birth data and the mother's hospital birth record and  
11 included three binary outcomes: severe maternal morbidity, inter-hospital transfer and breastfeeding.  
12 Severe maternal morbidity was defined using a validated composite indicator that captures a broad  
13 range of diagnoses and procedures such as cardiac arrest, renal failure or assisted ventilation.(24)  
14 Mothers requiring inter-hospital transfer were defined as those with at least one record with a mode of  
15 separation indicating transfer or where multiple hospitalisation records were present with differing  
16 hospital codes. Breastfeeding included any breastfeeding at the time of mother's discharge from  
17 hospital.  
18  
19  
20

21 Perinatal outcomes, including birth outcomes and those occurring within the first 28 days of life for the  
22 baby were retrieved from the birth data and the baby's linked hospital and birth registration records.  
23 These included perinatal death (stillbirth and neonatal death), preterm birth (<37 completed weeks of  
24 gestation), and small for gestational age (birth weight <3<sup>rd</sup> and/or 10<sup>th</sup> percentile for sex and age (25)).  
25 Admissions to a special care nursery (SCN) or neonatal intensive care unit (NICU) were assessed among  
26 an eligible population of babies born in a hospital classified as level 3 or above (NSW Ministry of Health's  
27 *Guide to the Role Delineation of Hospitals*) or a private hospital. Severe neonatal morbidity, measured  
28 according to a validated composite indicator (26), was assessed among all live births.  
29  
30  
31

### 32 Covariates

33 Maternal age and parity were reported according to the birth data. The mother's chronic conditions,  
34 hypertension and diabetes information were obtained from the birth data and the hospital birth  
35 record(s). We used the broad category of any hypertension rather than the specific categories of chronic  
36 hypertension, pregnancy hypertension, preeclampsia and eclampsia, as there is known misclassification  
37 among types of hypertension (27). The NSW ranking of the Australian Bureau of Statistics (ABS) 2011  
38 Socio-Economic Index for Areas (SEIFA) Index of Relative Socio-Economic Disadvantage (IRSD) and the  
39 2011 Remoteness Areas were used to assess the mother's relative socio-economic status and access to  
40 services respectively. Where available, the mother's 2011 Statistical Local Area (SLA) according to her  
41 birth data was used to assign these measures. Otherwise, and for all babies born in 2010, the mother's  
42 2010 SLA was used. Hospital type is an indicator of the size of a hospital and its location (urban or  
43 regional)(28) and was assigned using the hospital code recorded in the birth data.  
44  
45  
46  
47  
48

### 49 Statistical analyses

50 The study population was described using frequencies and percentages by potential confounders and  
51 the mother's smoking status. Summary statistics were calculated by mother's smoking status to  
52 investigate the associations between smoking during pregnancy and maternal and child outcomes. To  
53 estimate the unadjusted and adjusted relative risk of binary outcomes while accounting for the  
54 correlation within the data (some mothers had more than one baby during the study period), an  
55 extension to the modified Poisson regression (29) was used with an unstructured correlation matrix.  
56  
57  
58



1  
2  
3 Those observations where data were missing for an outcome were excluded from analysis for that  
4 outcome. SAS for Windows 9.4 (SAS Institute, Cary, NC, USA) was used for all data manipulation and  
5 analysis.  
6  
7

### 8 **Patient and public involvement**

9 An Aboriginal advisory committee was consulted prior to submission of the study proposal to ethics  
10 committees and throughout the process. The committee provided guidance on presentation and  
11 interpretation of results. It was of particular importance to members of the committee that the results  
12 were framed positively, ie the *benefits* of not smoking, rather than the risks of smoking. It was also  
13 important to committee members that all comparisons were among Aboriginal women and that  
14 Aboriginal women were not compared with non-Aboriginal women. There are plans to develop  
15 culturally appropriate educational material based on the results of this research and in collaboration  
16 with Aboriginal Health Workers and others involved in the care of Aboriginal women who are pregnant  
17 or may be planning a pregnancy.  
18  
19  
20

### 21 **Results**

22  
23  
24 Following exclusion of duplicates (n=76), a total of 487,388 babies were born to 379,116 mothers in  
25 NSW and were assessed for inclusion in this study. Records for 16,904 babies born to 12,720 mothers  
26 who were recorded as Aboriginal in the birth data were available for analysis. An additional 1,921 babies  
27 born to 1,624 mothers were identified as eligible for inclusion in the study using the ERA. Of the total  
28 18,825 babies, 557 were from a multiple birth and 114 were born to mothers who were not residents of  
29 NSW. These babies did not meet the eligibility criteria and were excluded. Thus the final study  
30 population consisted of 18,154 singleton babies born to 13,477 Aboriginal mothers. **Error! Reference  
31 source not found.** outlines the flow of participants in this study.  
32  
33  
34

35  
36 Among the study population, 9,235 (51%) babies were born to non-smoking mothers and 8,919 (49%)  
37 were born to smoking mothers (  
38  
39  
40  
41  
42  
43  
44  
45  
46  
47  
48  
49  
50  
51  
52  
53  
54  
55  
56  
57  
58  
59  
60

1  
2  
3 Table 1). Ascertainment of smoking information was increased by using both the birth and hospital data  
4 and only two percent of all linked records had contradictory smoking statuses from these data sources.  
5 For comparison, when smoking status was assigned only according to that reported on the birth data,  
6 52% of babies were born to non-smoking mothers and 48% were born to smoking mothers.  
7  
8

9 Mothers who reported not smoking at any time during their pregnancy were generally less  
10 disadvantaged than their smoking counterparts; approximately 8.1% of non-smoking mothers were in  
11 the highest SEIFA quintile, compared to just 4.1% of smoking mothers. Non-smoking mothers were  
12 older, lived in less remote regions and had fewer previous pregnancies than smoking mothers. The  
13 number of non-smoking mothers with hypertension (1,106) was almost double that of smoking mothers  
14 (578) and slightly more non-smoking mothers had diabetes (Table 1).  
15  
16  
17

18 The majority (70%) of mothers only had one baby during the study period however a substantial number  
19 had multiple: 25% had two, 4.4% had three and 0.4% had four. For 564 (4%) mothers, their smoking  
20 status changed between births, 6,814 (53%) mothers reported not smoking in all births during the study  
21 period and 6,099 (47%) consistently reported smoking. For the mothers whose smoking status changed,  
22 47% changed from smoking to non-smoking and 48% changed from non-smoking to smoking in all  
23 subsequent pregnancies.  
24  
25  
26

27 More mothers who did not smoke were breastfeeding their babies at the time of discharge from  
28 hospital: 75% of non-smoking mothers reported any breastfeeding compared to 62% of smoking  
29 mothers (Table 2). The rate of inter-hospital transfer was lower in the non-smoking group at 3.7%  
30 compared with the smoking group (5.1%), with an adjusted relative risk of RR=0.76 (95% CI 0.66, 0.89).  
31  
32

33 Adverse perinatal outcomes occurred less frequently among babies born to non-smoking mothers (Table  
34 3). Perinatal deaths were rare in both populations however the rate was lower in the non-smoking  
35 group with perinatal death occurring in 1.0% of babies born to non-smoking mothers, compared to 1.8%  
36 in smoking mothers. Also, severe neonatal morbidity and admission to SCN or NICU was less frequent in  
37 babies born to non-smoking mothers when compared to those born to smoking mothers.  
38  
39

40 Overall, the gestational age of babies from the non-smoking group was closer to term than those from  
41 the smoking group; more babies born to non-smoking mothers (66%) were born between 39 and 41  
42 weeks than those born to smoking mothers (55%). Preterm birth was considerably less frequent among  
43 babies born to mothers who did not smoke during pregnancy; 8.2% of births to non-smoking mothers  
44 were preterm compared to 14% from smoking mothers. Similarly, babies born to non-smoking mothers  
45 were less often small for gestational age, with 2.0% and 7.3% of these babies having a birthweight below  
46 the 3rd and 10th percentiles respectively compared to 7.0% and 20% of babies of smoking mothers. All  
47 relative risks were less than 1, suggesting a reduced risk of all adverse outcomes among babies born to  
48 non-smoking mothers when compared to those born to smoking mothers. Of note were the relative  
49 risks for preterm birth (RR=0.58 95% CI 0.53, 0.64), small-for-gestational age (<10<sup>th</sup> percentile; RR=0.35  
50 95% CI 0.32, 0.39) and perinatal death (RR=0.58 95% CI 0.44, 0.76).  
51  
52  
53  
54  
55  
56  
57  
58  
59  
60

## Discussion

This study of a recent population of pregnant Aboriginal women clearly demonstrates improved pregnancy outcomes among Aboriginal mothers who reported not smoking during pregnancy when compared to Aboriginal mothers who reported smoking during pregnancy. Benefits of not smoking were found for both maternal and perinatal outcomes. Mothers who did not smoke during pregnancy were 16% more likely to breastfeed their baby than their smoking counterparts. These results align with the literature from a general Australian population, where the odds of breastfeeding for smoking mothers are 0.8 times that of non-smoking mothers.(30) We also found non-smoking mothers had a 24% lower risk of being transferred to another hospital during the birth admission than smoking mothers of similar demographics. This means they are less likely to be away from their family and country during this challenging time. Although a slightly lower risk of severe maternal morbidity was found in the non-smoking group, there was not sufficient evidence to suggest a true difference existed as the confidence interval included 1 (RR=0.92, 95% CI 0.77–1.11). Among babies born to mothers of a similar age, with similar pre-existing conditions (any diabetes or hypertension), parity and socio-economic status, those with a non-smoking mother had a 42% less risk of perinatal death and preterm birth, 65% less risk of being small-for-gestational age (<10<sup>th</sup> percentile), 30% less risk of severe neonatal morbidity, and 33% less risk of being admitted to a SCN or NICU than those born to a mother who smoked at any time during her pregnancy.

The reductions in adverse outcomes for babies born to non-smoking mothers were statistically and clinically significant and remained so even after adjustment. Despite some rates being marginally higher, overall very little difference exists between the rates of adverse perinatal outcomes among the non-smoking Aboriginal mothers in this study and the general NSW population.(14) Some commonly included variables such as preterm birth or growth restrictions were not adjusted for as particular care was taken to avoid adjusting for variables on the causal pathway.

As expected, and similar to findings from other studies, (31) mothers from the non-smoking group were less disadvantaged, older, resided in less remote regions and had fewer previous pregnancies than those from the smoking group. Diabetes and hypertension were more prevalent among non-smoking mothers than smoking mothers. The small difference in prevalence of diabetes (8.7% vs 6.5%) could be due to the non-smoking group being slightly older than the smoking group. However the prevalence of hypertension in non-smoking mothers was almost double that of smoking mothers (12% vs 6.5%). Whilst this finding may surprise some, it is consistent with findings from previous studies (32-35). A systematic review of 48 studies concluded that smoking during pregnancy reduces the risk of preeclampsia by up to 50% and that there is a dose-response relationship (33). Similar results have been reported when the outcome includes gestational hypertension as well as preeclampsia, and the protective effect appears to continue even after women quit smoking later in pregnancy (35). This protective effect may be mediated via the biological effects of carbon monoxide that is formed during smoking (34). However, when preeclampsia does occur, the outcomes are much worse for babies whose mothers smoked (32). Although preeclampsia is associated with adverse pregnancy outcomes, and smoking reduces the incidence of preeclampsia, the net effect of smoking is still a worsening of pregnancy outcomes and there are dose-dependent increases in perinatal deaths and SGA babies among mothers who smoke

1  
2  
3 (32). Hence these findings in no way indicate any benefit to mothers or babies if the mother smokes  
4 during pregnancy.  
5

6  
7 As well as being a national health priority in Australia, reducing smoking during pregnancy is a key  
8 performance indicator in the annual service agreements between the NSW Ministry of Health and Local  
9 Health Districts.(36) As part of this commitment, the Quit for New Life program was established in 2013  
10 with the aim to support women having an Aboriginal baby to quit smoking. The program was integrated  
11 into Aboriginal Maternal and Infant Health Services and has supported over 2,500 pregnant women, 950  
12 postnatal women and 1,650 cohabitants in their quit attempt.(37) However, further efforts including  
13 health professional training, expansion to other maternal health services and community programs, and  
14 improved data collection and reporting are required to reduce the prevalence of smoking in pregnancy  
15 in this population.  
16  
17

18  
19 Health professionals have a critical role in communicating the benefits of not smoking during pregnancy  
20 found in this study. However some practitioners perceive intervention to be ineffective and thus may  
21 not raise this issue with their patients.(38) The highly relevant evidence from this study may increase the  
22 salience of the issue and provide further motivation for health professionals to consistently ask and  
23 advise about smoking.  
24  
25

26 While the health impacts of smoking on maternal and child health are well known (9-13), this study  
27 provides local information that can be used to further engage Australian health professionals and  
28 community members on the benefits of not smoking. Building on the strength and resilience of  
29 Aboriginal people is an important foundation for efforts to reduce smoking among this population.(39)  
30 Using local evidence on the *benefits* of not smoking during pregnancy has the potential to re-frame  
31 health messages for women, their families and communities and to mobilise community action to  
32 achieve better health outcomes.  
33  
34  
35

### 36 **Strengths and limitations**

37 This is the first study we are aware of that examines associations between smoking in pregnancy and  
38 adverse pregnancy outcomes exclusively among Aboriginal and/or Torres Strait Islander women. This  
39 was a large population-based study. Using data linkage, we were able to capture more women through  
40 the ERA, further increasing our sample size. Despite the unavailability of information surrounding some  
41 potential confounders our findings were consistent with those among other populations from the  
42 literature (9-13). Limited data on the heaviness of smoking during pregnancy meant that potential dose  
43 effects could not be calculated. However, new data around quitting in pregnancy is available from 2016  
44 onward so there is potential for future work to examine this phenomenon further. Similarly, no  
45 information was available on the mother's history of smoking or alcohol consumption and so effects  
46 from longer term smoking and potential confounding from alcohol consumption could not be accounted  
47 for. A lack of data surrounding history and heaviness of smoking means that the treatment effects  
48 estimated in this study are likely to be biased toward the null and thus underestimate the true benefits  
49 of not smoking in pregnancy.  
50  
51  
52  
53  
54  
55  
56  
57  
58  
59  
60

## Conclusions

Babies born to Aboriginal mothers who did not smoke during pregnancy were at a significantly reduced risk of all adverse perinatal outcomes compared to those born to smoking mothers of similar demographics. Rates of these adverse outcomes among Aboriginal women who did not smoke were very similar to those among the general NSW population.

These results reinforce the importance of targeted smoking cessation policy for Aboriginal women. Barriers to smoking cessation in this population are complex and it is vital that this evidence is provided concurrently with sufficient support to enable Aboriginal women to quit smoking. Distributing this information in isolation runs the risk of furthering shame and stress experienced by pregnant women and may discourage them from seeking further help, highlighting the importance of systematic approaches to encourage and support Aboriginal women to quit smoking.

### What is already known on this topic

- Despite a significant decline in smoking among the general Australian population, smoking rates remain high among pregnant Aboriginal women.
- Growing evidence suggests targeted smoking cessation policy is more effective among Aboriginal Australians.
- Although the benefits of not smoking during pregnancy are well established, no previous studies have demonstrated associations between not smoking in pregnancy and positive pregnancy outcomes *among* Aboriginal women.

### What this study adds

- Babies born to Aboriginal mothers who did not smoke during pregnancy were at a significantly reduced risk of all adverse perinatal outcomes compared to those born to smoking mothers of similar demographics.

## Acknowledgements

The authors would like to thank the members of the Aboriginal Advisory Committee who provided valuable advice, the NSW Ministry of Health for providing access to the datasets used and the Centre for Health Record Linkage for linking these datasets.

## Footnotes

### Copyright

The Corresponding Author has the right to grant on behalf of all authors and does grant on behalf of all authors, a worldwide licence to the Publishers and its licensees in perpetuity, in all forms, formats and

1  
2  
3 media (whether known now or created in the future), to i) publish, reproduce, distribute, display and  
4 store the Contribution, ii) translate the Contribution into other languages, create adaptations, reprints,  
5 include within collections and create summaries, extracts and/or, abstracts of the Contribution, iii)  
6 create any other derivative work(s) based on the Contribution, iv) to exploit all subsidiary rights in the  
7 Contribution, v) the inclusion of electronic links from the Contribution to third party material where-  
8 ever it may be located; and, vi) licence any third party to do any or all of the above.  
9

### 11 **Contributors**

12 JMitchell and AM had the initial idea for this study. ST wrote the study proposal and was responsible for  
13 the ethics application. CM undertook all analyses, with guidance from ST, II and DR, and drafted the  
14 manuscript. JF, JMorris, JMitchell, AM and ST all contributed to the design of the study and, with DM,  
15 the interpretation of the results. All authors commented on drafts and read and approved the final  
16 manuscript. The corresponding author attests that all listed authors meet authorship criteria and that no  
17 others meeting the criteria have been omitted. CM is the guarantor.  
18  
19

### 21 **Statement of Conflicts of Interest**

22 All authors have completed the ICMJE uniform disclosure form at [www.icmje.org/coi\\_disclosure.pdf](http://www.icmje.org/coi_disclosure.pdf) and  
23 declare: CM and ST's salaries came from a Prevention Research Support Program grant from the NSW  
24 Ministry of Health, no other relationships or activities that could appear to have influenced the  
25 submitted work.  
26  
27

### 29 **Role of the Funding Source**

30 This work was completed while Carol McInerney was employed as a trainee on the NSW Biostatistics  
31 Training Program funded by the NSW Ministry of Health. She undertook this work whilst based at the  
32 Clinical and Population Perinatal Health Research, Kolling Institute, Northern Sydney Local Health  
33 District. Carol McInerney and Siranda Torvaldsen are supported by the NSW Ministry of Health  
34 Prevention Research Support Program grant. The funder had no role in the study design, analysis or  
35 interpretation of the data or in the writing of the report. However, the NSW Ministry of Health requires  
36 all Biostatistics Trainees to seek their approval before submitting a manuscript for publication.  
37  
38

### 40 **Ethics approval**

41 Ethics approval for this study was given by the Aboriginal Health and Medical Research Council of New  
42 South Wales, Australia (HREC reference number: 1326/17) and was exempt from informed consent  
43 requirements as there was no contact with the study population and the authors only had access to de-  
44 identified data.  
45  
46

### 47 **Transparency statement**

48 The lead author affirms that the manuscript is an honest, accurate, and transparent account of the study  
49 being reported; that no important aspects of the study have been omitted; and that any discrepancies  
50 from the study as planned have been explained.  
51

### 53 **Data sharing**

54 No additional data are available.  
55  
56  
57

## References

1. Department of Health. Tobacco Control - key facts and figures 2018 [Available from: <http://www.health.gov.au/internet/publications/publishing.nsf/Content/tobacco-control-toc>.
2. Centre for Epidemiology and Evidence. NSW Mothers and Babies 2016. Sydney: NSW Ministry of Health. 2017.
3. Gould GS, Cadet-James Y, Clough AR. Getting over the shock: taking action on Indigenous maternal smoking. *Aust J Prim Health*. 2016;22(4):276-82.
4. NSW Ministry of Health. Snapshot of Tobacco Strategy 2012-2017. 2017.
5. Australian Bureau of Statistics. Estimates of Aboriginal and Torres Strait Islander Australians, June 2011. 2013 [Available from: <http://www.abs.gov.au/ausstats/abs@.nsf/mf/3238.0.55.001>.
6. NSW Department of Health. Communicating positively - A guide to appropriate Aboriginal terminology. Sydney: NSW Department of Health. 2004.
7. Carson KV, Brinn MP, Peters M, Veale A, Esterman AJ, Smith BJ. Interventions for smoking cessation in Indigenous populations. *Cochrane database of systematic reviews (Online)*. 2012;1.
8. Passey ME, Sanson-Fisher RW, Stirling JM. Supporting Pregnant Aboriginal and Torres Strait Islander Women to Quit Smoking: Views of Antenatal Care Providers and Pregnant Indigenous Women. *Matern Child Health J*. 2014;18(10):2293-9.
9. Cnattingius S. The epidemiology of smoking during pregnancy: smoking prevalence, maternal characteristics, and pregnancy outcomes. *Nicotine & tobacco research : official journal of the Society for Research on Nicotine and Tobacco*. 2004;6 Suppl 2:S125-40.
10. Marufu TC, Ahankari A, Coleman T, Lewis S. Maternal smoking and the risk of still birth: systematic review and meta-analysis. *BMC public health*. 2015;15:239.
11. Mendelsohn C, Gould GS, Oncken C. Management of smoking in pregnant women. *Australian family physician*. 2014;43(1):46-51.
12. Salihi HM, Wilson RE. Epidemiology of prenatal smoking and perinatal outcomes. *Early Hum Dev*. 2007;83(11):713-20.
13. US Department of Health and Human Services. The Health Consequences of Smoking—50 Years of Progress: A Report of the Surgeon General. . In: US Department of Health and Human Services CfDCaP, National Center for Chronic Disease Prevention and Health Promotion, Office on Smoking and Health, editor. Atlanta, GA2014.
14. Centre for Epidemiology and Evidence. New South Wales Mothers and Babies 2014. Sydney: NSW Ministry of Health. 2016.
15. Centre for Health Record Linkage. Quality assurance 2018 [Available from: <http://www.cherel.org.au/quality-assurance>.
16. Bentley JP, Ford JB, Taylor LK, Irvine KA, Roberts CL. Investigating linkage rates among probabilistically linked birth and hospitalization records. *BMC Medical Research Methodology*. 2012;12.
17. Australian Institute of Health and Welfare and Australian Bureau of Statistics. National best practice guidelines for data linkage activities relating to Aboriginal and Torres Strait Islander people. AIHW Cat No IHW 74. 2012.
18. Christensen D, Davis G, Draper G, Mitrou F, McKeown S, Lawrence D, et al. Evidence for the use of an algorithm in resolving inconsistent and missing Indigenous status in administrative data collections. *Austr J Soc Iss*. 2014;49(4):423-43.
19. Division PaPH. Improved reporting of Aboriginal and Torres Strait Islander peoples on population datasets in New South Wales using record linkage—a feasibility study. Sydney: NSW Ministry of Health. 2012.
20. Xu F, Sullivan EA, Madden RC, Black D, Pulver LR. Improvement of maternal Aboriginality in NSW birth data. *BMC Med Res Methodol*. 2012;12:8.

21. Taylor LK, Bentley J, Hunt J, Madden R, McKeown S, Brandt P, et al. Enhanced reporting of deaths among Aboriginal and Torres Strait Islander peoples using linked administrative health datasets. *BMC Medical Research Methodology*. 2012;12(1).
22. Gibberd AJ, Simpson JM, Eades SJ. Use of family relationships improved consistency of identification of Aboriginal people in linked administrative data. *J Clin Epidemiol*. 2017;90:144-55.
23. Havard A, Jorm LR, Lujic S. Risk adjustment for smoking identified through tobacco use diagnoses in hospital data: A validation study. *PLoS ONE*. 2014;9(4).
24. Roberts CL, Cameron CA, Bell JC, Algert CS, Morris JM. Measuring maternal morbidity in routinely collected health data: Development and validation of a maternal morbidity outcome indicator. *Med Care*. 2008;46(8):786-94.
25. Dobbins TA, Sullivan EA, Roberts CL, Simpson JM. Australian national birthweight percentiles by sex and gestational age, 1998-2007. *Med J Aust*. 2012;197(5):291-4.
26. Lain SJ, Algert CS, Nassar N, Bowen JR, Roberts CL. Incidence of severe adverse neonatal outcomes: Use of a composite indicator in a population cohort. *Matern Child Health J*. 2012;16(3):600-8.
27. Roberts CL, Bell JC, Ford JB, Hadfield RM, Algert CS, Morris JM. The accuracy of reporting of the hypertensive disorders of pregnancy in population health data. *Hypertension in Pregnancy*. 2008;27(3):285-97.
28. Falster MO, Roberts CL, Ford J, Morris J, Kinnear A, Nicholl M. Development of a maternity hospital classification for use in perinatal research. *N S W Public Health Bull*. 2012;23(1-2):12-6.
29. Zou GY, Donner A. Extension of the modified Poisson regression model to prospective studies with correlated binary data. *Stat Methods Med Res*. 2013;22(6):661-70.
30. Giglia R, Binns CW, Alfonso H. Maternal cigarette smoking and breastfeeding duration. *Acta Paediatr Int J Paediatr*. 2006;95(11):1370-4.
31. Cnattingius S. The epidemiology of smoking during pregnancy: Smoking prevalence, maternal characteristics, and pregnancy outcomes. *Nicotine & Tobacco Research*. 2004;6:125-40.
32. Cnattingius S, Mills JL, Yuen J, Eriksson O, Salonen H. The paradoxical effect of smoking in preeclamptic pregnancies: smoking reduces the incidence but increases the rates of perinatal mortality, abruptio placentae, and intrauterine growth restriction. *American Journal of Obstetrics & Gynecology*. 1997;177(1):156-61.
33. England L, Zhang J. Smoking and risk of preeclampsia: a systematic review. *Frontiers in Bioscience*. 2007;12:2471-83.
34. Karumanchi SA, Levine RJ. How does smoking reduce the risk of preeclampsia? *Hypertension*. 2010;55(5):1100-1.
35. Zhang J, Klebanoff MA, Levine RJ, Puri M, Moyer P. The puzzling association between smoking and hypertension during pregnancy. *American Journal of Obstetrics & Gynecology*. 1999;181(6):1407-13.
36. New South Wales Health. NSW Health Service Agreement 2017 [Available from: <https://www.health.nsw.gov.au/Performance/Documents/service-agreement-generic.pdf>].
37. Centre for Population Health. Quit for New Life: New South Wales Health,; 2018 [Available from: <https://www.health.nsw.gov.au/tobacco/Pages/quit-for-new-life.aspx>].
38. The Royal Australian College of General Practitioners. Supporting Smoking Cessation 2014 [Available from: <https://www.racgp.org.au/your-practice/guidelines/smoking-cessation/the-role-of-health-professionals/>].
39. Aboriginal Health & Medical Research Council of NSW and NSW Ministry of Health. The ATRAC Framework: A strategic framework for Aboriginal tobacco resistance and control in NSW. Sydney, Australia. 2014.



1  
2  
3  
4  
5  
6  
7  
8  
9  
10  
11  
12  
13  
14  
15  
16  
17  
18  
19  
20  
21  
22  
23  
24  
25  
26  
27  
28  
29  
30  
31  
32  
33  
34  
35  
36  
37  
38  
39  
40  
41  
42  
43  
44  
45  
46  
47  
48  
49  
50  
51  
52  
53  
54  
55  
56  
57  
58  
59  
60

40. Chen JS, Roberts CL, Simpson JM, Ford JB. Use of hospitalisation history (lookback) to determine prevalence of chronic diseases: Impact on modelling of risk factors for haemorrhage in pregnancy. BMC Medical Research Methodology. 2011;11.

For peer review only

*Table 1 Demographics at the time of birth of all Aboriginal or Torres Strait Islander mothers who gave birth to at least one singleton baby in NSW between 2010 and 2014 reported for all births and by smoking status during pregnancy.*

|                               | All births |     | Non-smoking                   |     | Smoking                      |     |
|-------------------------------|------------|-----|-------------------------------|-----|------------------------------|-----|
|                               | N = 18,154 |     | N <sub>ns</sub> = 9,235 (51%) |     | N <sub>s</sub> = 8,919 (49%) |     |
| Year (Baby's DOB)             | n          | %   | n                             | %   | n                            | %   |
| 2010                          | 3,487      | 19  | 1,740                         | 50* | 1,747                        | 50* |
| 2011                          | 3,380      | 19  | 1,638                         | 48* | 1,742                        | 52* |
| 2012                          | 3,680      | 20  | 1,833                         | 50* | 1,847                        | 50* |
| 2013                          | 3,716      | 20  | 1,944                         | 52* | 1,772                        | 48* |
| 2014                          | 3,891      | 21  | 2,080                         | 53* | 1,811                        | 47* |
| <b>Maternal age</b>           |            |     |                               |     |                              |     |
| Under 20                      | 3,214      | 18  | 1,568                         | 17  | 1,646                        | 19  |
| 20–24                         | 6,014      | 33  | 2,983                         | 32  | 3,031                        | 34  |
| 25–29                         | 4,608      | 25  | 2,381                         | 26  | 2,227                        | 25  |
| 30–34                         | 2,729      | 15  | 1,455                         | 16  | 1,274                        | 14  |
| 35 and over                   | 1,589      | 8.8 | 848                           | 9.2 | 741                          | 8.3 |
| Total                         | 18,154     | 100 | 9,235                         | 100 | 8,919                        | 100 |
| <b>Parity</b>                 |            |     |                               |     |                              |     |
| 0                             | 6,259      | 35  | 3,720                         | 40  | 2,539                        | 29  |
| 1                             | 4,709      | 26  | 2,589                         | 28  | 2,120                        | 24  |
| 2                             | 3,107      | 17  | 1,490                         | 16  | 1,617                        | 18  |
| 3+                            | 4,072      | 22  | 1,431                         | 16  | 2,641                        | 30  |
| Total                         | 18,147     | 100 | 9,230                         | 100 | 8,917                        | 100 |
| <b>SEIFA IRSD quintiles**</b> |            |     |                               |     |                              |     |
| 1st – most disadvantaged      | 4,827      | 27  | 2,131                         | 23  | 2,696                        | 30  |
| 2nd                           | 3,674      | 20  | 1,887                         | 21  | 1,787                        | 20  |
| 3rd                           | 5,375      | 30  | 2,806                         | 31  | 2,569                        | 29  |
| 4th                           | 3,068      | 17  | 1,617                         | 18  | 1,451                        | 16  |
| 5th – least disadvantaged     | 1,115      | 6.2 | 748                           | 8.1 | 367                          | 4.1 |
| Total                         | 18,059     | 100 | 9,189                         | 100 | 8,870                        | 100 |
| <b>Remoteness area</b>        |            |     |                               |     |                              |     |
| Major cities                  | 4,193      | 23  | 2,246                         | 24  | 1,947                        | 22  |
| Inner regional                | 6,147      | 34  | 3,310                         | 36  | 2,837                        | 32  |
| Outer regional                | 6,097      | 34  | 2,966                         | 32  | 3,131                        | 35  |
| Remote                        | 1,027      | 5.7 | 421                           | 4.6 | 606                          | 6.8 |
| Very remote                   | 595        | 3.3 | 245                           | 2.7 | 350                          | 4.0 |
| Total                         | 18,059     | 100 | 9,188                         | 100 | 8,871                        | 100 |
| <b>Hospital level</b>         |            |     |                               |     |                              |     |
| Tertiary                      | 4,099      | 23  | 2,108                         | 23  | 1,991                        | 22  |
| Small and medium urban        | 308        | 1.7 | 178                           | 1.8 | 130                          | 1.5 |
| Large urban                   | 2,895      | 16  | 1,607                         | 9   | 1,288                        | 14  |

|                                       |        |     |       |     |       |     |
|---------------------------------------|--------|-----|-------|-----|-------|-----|
| Small regional                        | 3,441  | 19  | 1,519 | 16  | 1,922 | 22  |
| Medium regional                       | 3,042  | 17  | 1,550 | 17  | 1,492 | 17  |
| Large regional                        | 3,897  | 21  | 1,896 | 21  | 2,001 | 22  |
| Private                               | 336    | 1.7 | 323   | 3.2 | 13    | 0.2 |
| Other                                 | 136    | 0.7 | 54    | 0.6 | 82    | 0.9 |
| Total                                 | 18,154 | 100 | 9,235 | 100 | 8,919 | 100 |
| <b>Chronic conditions<sup>^</sup></b> |        |     |       |     |       |     |
| Yes                                   | 343    | 1.9 | 147   | 1.6 | 196   | 2.2 |
| Total                                 | 18,154 | 100 | 9,235 | 100 | 8,919 | 100 |
| <b>Any hypertension</b>               |        |     |       |     |       |     |
| Yes                                   | 1,684  | 9.3 | 1,106 | 12  | 578   | 6.5 |
| Total                                 | 18,154 | 100 | 9,235 | 100 | 8,919 | 100 |
| <b>Any diabetes</b>                   |        |     |       |     |       |     |
| Yes                                   | 1,413  | 7.8 | 804   | 8.7 | 609   | 6.5 |
| Total                                 | 18,154 | 100 | 9,235 | 100 | 8,919 | 100 |

\* Percentage of all births within each year.

\*\*Socio-Economic Index for Areas – Index of Relative Socio-Economic Disadvantage (SEIFA IRSD). When ranking areas within NSW in order of their relative disadvantage, the lowest 20% (most disadvantaged) fall in the 1<sup>st</sup> quintile and the highest 20% (least disadvantaged) fall in 5<sup>th</sup> quintile.

<sup>^</sup>Chronic conditions encompasses renal, cardiac, thyroid, asthma, psychiatric, and other autoimmune conditions(40).

Table 2 Frequencies of maternal outcomes at the time of birth of all Aboriginal mothers by smoking status during pregnancy.

|                                               | All births |     | Non-smoking             |     | Smoking                |     | Unadjusted           | Adjusted               |
|-----------------------------------------------|------------|-----|-------------------------|-----|------------------------|-----|----------------------|------------------------|
|                                               | N = 18,154 |     | N <sub>ns</sub> = 9,235 |     | N <sub>s</sub> = 8,919 |     |                      |                        |
|                                               | n          | %   | n                       | %   | n                      | %   | RR (95% CI)          | RR (95% CI)            |
| <b>Severe maternal morbidity</b>              |            |     |                         |     |                        |     |                      |                        |
| Yes                                           | 523        | 2.9 | 257                     | 2.8 | 266                    | 3.0 | 0.94<br>(0.79, 1.12) | 0.92*<br>(0.77, 1.11)  |
| <b>Inter-hospital transfer</b>                |            |     |                         |     |                        |     |                      |                        |
| Yes                                           | 793        | 4.4 | 337                     | 3.7 | 456                    | 5.1 | 0.73<br>(0.63, 0.84) | 0.76**<br>(0.66, 0.89) |
| <b>Breastfeeding on discharge<sup>^</sup></b> |            |     |                         |     |                        |     |                      |                        |
| Yes                                           | 12,500     | 69  | 6,970                   | 75  | 5,530                  | 62  | 1.19<br>(1.16, 1.21) | 1.16*<br>(1.14, 1.19)  |

\*adjusted for maternal age, any hypertension, any diabetes, parity and socio-economic status (SEIFA).

\*\* adjusted for maternal age, any hypertension, any diabetes, parity and remoteness area.

<sup>^</sup> Refers to a baby receiving any breast milk at the time of mother's discharge from hospital.

1  
2  
3  
4  
5  
6  
7  
8  
9  
10  
11  
12  
13  
14  
15  
16  
17  
18  
19  
20  
21  
22  
23  
24  
25  
26  
27  
28  
29  
30  
31  
32  
33  
34  
35  
36  
37  
38  
39  
40  
41  
42  
43  
44  
45  
46  
47

Table 3 Frequencies of perinatal outcomes among all babies born to Aboriginal or Torres Strait Islander mothers by maternal smoking status.

|                                                                     | NSW population | All births |     | Non-smoking             |     | Smoking                |     | Unadjusted           | Adjusted*            |
|---------------------------------------------------------------------|----------------|------------|-----|-------------------------|-----|------------------------|-----|----------------------|----------------------|
|                                                                     |                | N = 18,154 |     | N <sub>ns</sub> = 9,235 |     | N <sub>s</sub> = 8,919 |     |                      |                      |
| Preterm birth (<37 wks)                                             | %              | n          | %   | n                       | %   | n                      | %   | RR (95% CI)          | RR (95% CI)          |
| Yes                                                                 | 8              | 2,045      | 11  | 760                     | 8.2 | 1,285                  | 14  | 0.59<br>(0.54, 0.64) | 0.58<br>(0.53, 0.64) |
| Total                                                               |                | 18,154     | 100 | 9,235                   | 100 | 8,919                  | 100 |                      |                      |
| Small for gestational age (<3 <sup>rd</sup> population percentile)  |                |            |     |                         |     |                        |     |                      |                      |
| Yes                                                                 | 3              | 835        | 4.6 | 183                     | 2.0 | 652                    | 7.3 | 0.28<br>(0.23, 0.32) | 0.27<br>(0.23, 0.32) |
| Total                                                               |                | 18,132     | 100 | 9,229                   | 100 | 8,903                  | 100 |                      |                      |
| Small for gestational age (<10 <sup>th</sup> population percentile) |                |            |     |                         |     |                        |     |                      |                      |
| Yes                                                                 | 10             | 2,381      | 13  | 641                     | 7.0 | 1,740                  | 20  | 0.36<br>(0.33, 0.39) | 0.35<br>(0.32, 0.39) |
| Total                                                               |                | 18,132     | 100 | 9,229                   | 100 | 8,903                  | 100 |                      |                      |
| Severe neonatal morbidity                                           |                |            |     |                         |     |                        |     |                      |                      |
| Among live births only                                              |                |            |     |                         |     |                        |     |                      |                      |
| Yes                                                                 | 5              | 1,470      | 8.2 | 636                     | 6.9 | 834                    | 9.5 | 0.74<br>(0.67, 0.81) | 0.70<br>(0.63, 0.77) |
| Total                                                               |                | 17,978     | 100 | 9,169                   | 100 | 8,809                  | 100 |                      |                      |
| Admission to SCN or NICU <sup>a</sup>                               |                |            |     |                         |     |                        |     |                      |                      |
| Yes                                                                 | 15             | 3,957      | 22  | 1,645                   | 18  | 2,312                  | 26  | 0.70<br>(0.66, 0.75) | 0.66<br>(0.63, 0.70) |
| Total                                                               |                | 17,809     | 100 | 9,059                   | 100 | 8,750                  | 100 |                      |                      |
| Perinatal death                                                     |                |            |     |                         |     |                        |     |                      |                      |
| Rate per 1,000 total births                                         |                |            |     |                         |     |                        |     |                      |                      |
| Yes                                                                 | 8              | 254        | 14  | 92                      | 10  | 162                    | 18  | 0.54<br>(0.42, 0.70) | 0.58<br>(0.44, 0.76) |
| Stillborn                                                           | 6              | 162        |     | 60                      | 6.5 | 102                    | 11  | 0.57<br>(0.41, 0.78) | 0.60<br>(0.43, 0.84) |
| Rate per 1,000 live births                                          |                |            |     |                         |     |                        |     |                      |                      |
| Neonatal death                                                      | 2              | 92         |     | 32                      | 3.5 | 60                     | 6.8 | 0.50                 | 0.54                 |

|  |  |  |  |  |  |  |  |  |  |              |              |
|--|--|--|--|--|--|--|--|--|--|--------------|--------------|
|  |  |  |  |  |  |  |  |  |  | (0.33, 0.78) | (0.34, 0.86) |
|--|--|--|--|--|--|--|--|--|--|--------------|--------------|

\*adjusted for maternal age, any hypertension, any diabetes, parity and socio-economic status (SEIFA).

^Admission to Special Care Nursery (SCN) or Neonatal Intensive Care Unit (NICU) was restricted to those babies recorded as being born in a hospital of maternity service level 3 or higher or a private hospital.

For peer review only

1  
2  
3  
4  
5  
6  
7  
8  
9  
10  
11  
12  
13  
14  
15  
16  
17  
18  
19  
20  
21  
22  
23  
24  
25  
26  
27  
28  
29  
30  
31  
32  
33  
34  
35  
36  
37  
38  
39  
40  
41  
42  
43  
44  
45  
46  
47

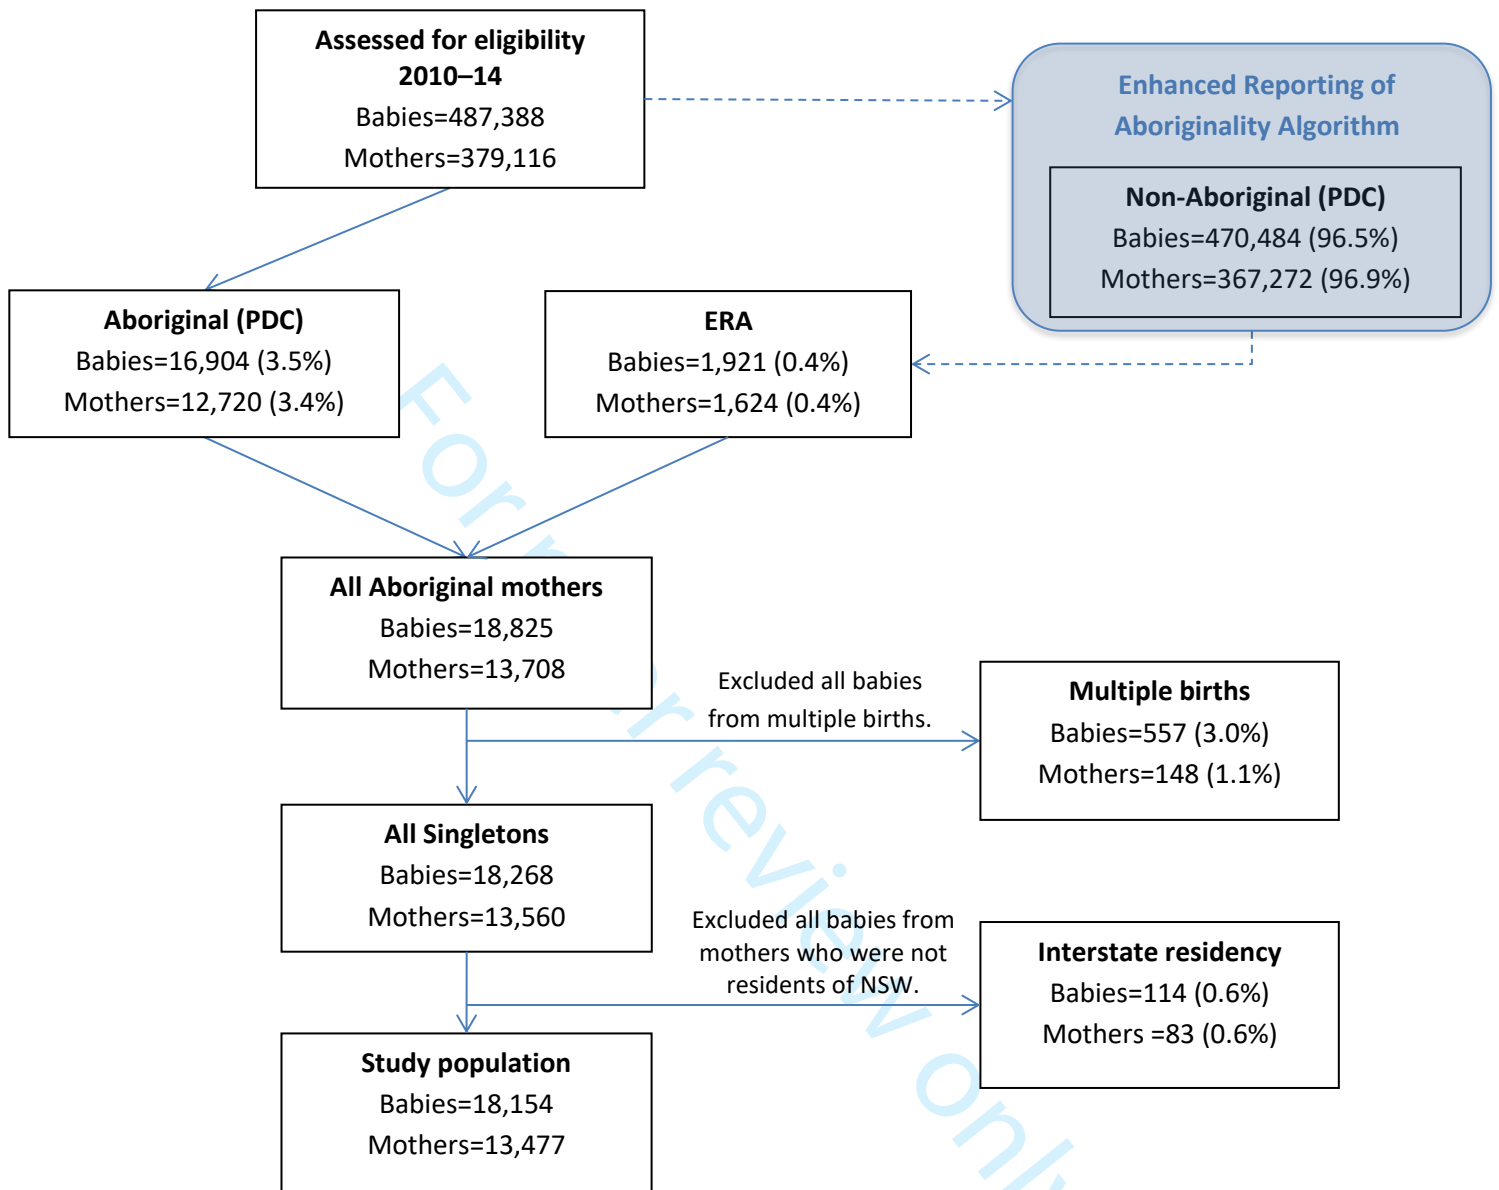

Figure 1 Flow diagram of mothers and babies eligible for inclusion in the final study population.

STROBE Statement—Checklist of items that should be included in reports of *cohort studies*  
**Manuscript for: Benefits of not smoking during pregnancy for Australian Aboriginal and Torres Strait Islander women and their babies: a retrospective cohort study using linked data**

|                              | Item No | Recommendation                                                                                                                                                                                    | Page No     |
|------------------------------|---------|---------------------------------------------------------------------------------------------------------------------------------------------------------------------------------------------------|-------------|
| <b>Title and abstract</b>    | 1       | (a) Indicate the study's design with a commonly used term in the title or the abstract                                                                                                            | 1           |
|                              |         | (b) Provide in the abstract an informative and balanced summary of what was done and what was found                                                                                               | 1           |
| <b>Introduction</b>          |         |                                                                                                                                                                                                   |             |
| Background/rationale         | 2       | Explain the scientific background and rationale for the investigation being reported                                                                                                              | 2           |
| Objectives                   | 3       | State specific objectives, including any prespecified hypotheses                                                                                                                                  | 2           |
| <b>Methods</b>               |         |                                                                                                                                                                                                   |             |
| Study design                 | 4       | Present key elements of study design early in the paper                                                                                                                                           | 2           |
| Setting                      | 5       | Describe the setting, locations, and relevant dates, including periods of recruitment, exposure, follow-up, and data collection                                                                   | 2           |
| Participants                 | 6       | (a) Give the eligibility criteria, and the sources and methods of selection of participants. Describe methods of follow-up                                                                        | 2-3         |
|                              |         | (b) For matched studies, give matching criteria and number of exposed and unexposed                                                                                                               | 2-3         |
| Variables                    | 7       | Clearly define all outcomes, exposures, predictors, potential confounders, and effect modifiers. Give diagnostic criteria, if applicable                                                          | 3-4         |
| Data sources/<br>measurement | 8*      | For each variable of interest, give sources of data and details of methods of assessment (measurement). Describe comparability of assessment methods if there is more than one group              | 3-4         |
| Bias                         | 9       | Describe any efforts to address potential sources of bias                                                                                                                                         | 4           |
| Study size                   | 10      | Explain how the study size was arrived at                                                                                                                                                         | 2           |
| Quantitative variables       | 11      | Explain how quantitative variables were handled in the analyses. If applicable, describe which groupings were chosen and why                                                                      | 4           |
| Statistical methods          | 12      | (a) Describe all statistical methods, including those used to control for confounding                                                                                                             | 4-5         |
|                              |         | (b) Describe any methods used to examine subgroups and interactions                                                                                                                               |             |
|                              |         | (c) Explain how missing data were addressed                                                                                                                                                       | 5           |
|                              |         | (d) If applicable, explain how loss to follow-up was addressed                                                                                                                                    |             |
|                              |         | (e) Describe any sensitivity analyses                                                                                                                                                             |             |
| <b>Results</b>               |         |                                                                                                                                                                                                   |             |
| Participants                 | 13*     | (a) Report numbers of individuals at each stage of study—eg numbers potentially eligible, examined for eligibility, confirmed eligible, included in the study, completing follow-up, and analysed | Fig 1       |
|                              |         | (b) Give reasons for non-participation at each stage                                                                                                                                              | Fig 1       |
|                              |         | (c) Consider use of a flow diagram                                                                                                                                                                | Fig 1       |
| Descriptive data             | 14*     | (a) Give characteristics of study participants (eg demographic, clinical, social) and information on exposures and potential confounders                                                          | Table 1     |
|                              |         | (b) Indicate number of participants with missing data for each variable of interest                                                                                                               | Table 1,2,3 |
|                              |         | (c) Summarise follow-up time (eg, average and total amount)                                                                                                                                       |             |
| Outcome data                 | 15*     | Report numbers of outcome events or summary measures over time                                                                                                                                    | Table       |



2,3

|    |                          |    |                                                                                |
|----|--------------------------|----|--------------------------------------------------------------------------------|
| 1  |                          |    | 2,3                                                                            |
| 2  | Main results             | 16 | (a) Give unadjusted estimates and, if applicable, confounder-adjusted          |
| 3  |                          |    | estimates and their precision (eg, 95% confidence interval). Make clear        |
| 4  |                          |    | which confounders were adjusted for and why they were included                 |
| 5  |                          |    | Table                                                                          |
| 6  |                          |    | 2,3                                                                            |
| 7  |                          |    |                                                                                |
| 8  |                          |    | (b) Report category boundaries when continuous variables were                  |
| 9  |                          |    | categorized                                                                    |
| 10 |                          |    | (c) If relevant, consider translating estimates of relative risk into absolute |
| 11 |                          |    | risk for a meaningful time period                                              |
| 12 | Other analyses           | 17 | Report other analyses done—eg analyses of subgroups and interactions,          |
| 13 |                          |    | and sensitivity analyses                                                       |
| 14 | <b>Discussion</b>        |    |                                                                                |
| 15 | Key results              | 18 | Summarise key results with reference to study objectives                       |
| 16 |                          |    | 6                                                                              |
| 17 | Limitations              | 19 | Discuss limitations of the study, taking into account sources of potential     |
| 18 |                          |    | bias or imprecision. Discuss both direction and magnitude of any               |
| 19 |                          |    | potential bias                                                                 |
| 20 | Interpretation           | 20 | Give a cautious overall interpretation of results considering objectives,      |
| 21 |                          |    | limitations, multiplicity of analyses, results from similar studies, and       |
| 22 |                          |    | other relevant evidence                                                        |
| 23 |                          |    | 6,7                                                                            |
| 24 | Generalisability         | 21 | Discuss the generalisability (external validity) of the study results          |
| 25 |                          |    | 8                                                                              |
| 26 | <b>Other information</b> |    |                                                                                |
| 27 | Funding                  | 22 | Give the source of funding and the role of the funders for the present         |
| 28 |                          |    | study and, if applicable, for the original study on which the present          |
| 29 |                          |    | article is based                                                               |
| 30 |                          |    | 10                                                                             |

\*Give information separately for exposed and unexposed groups.

**Note:** An Explanation and Elaboration article discusses each checklist item and gives methodological background and published examples of transparent reporting. The STROBE checklist is best used in conjunction with this article (freely available on the Web sites of PLoS Medicine at <http://www.plosmedicine.org/>, Annals of Internal Medicine at <http://www.annals.org/>, and Epidemiology at <http://www.epidem.com/>). Information on the STROBE Initiative is available at <http://www.strobe-statement.org>.

# BMJ Open

## Benefits of not smoking during pregnancy for Australian Aboriginal and Torres Strait Islander women and their babies: a retrospective cohort study using linked data

|                                 |                                                                                                                                                                                                                                                                                                                                                                                                                                                                                                                                                                                                                                                                                                                                                                                                                                                                                                                                                                                                                                                                                                                                                                                                                                                                                                                                                            |
|---------------------------------|------------------------------------------------------------------------------------------------------------------------------------------------------------------------------------------------------------------------------------------------------------------------------------------------------------------------------------------------------------------------------------------------------------------------------------------------------------------------------------------------------------------------------------------------------------------------------------------------------------------------------------------------------------------------------------------------------------------------------------------------------------------------------------------------------------------------------------------------------------------------------------------------------------------------------------------------------------------------------------------------------------------------------------------------------------------------------------------------------------------------------------------------------------------------------------------------------------------------------------------------------------------------------------------------------------------------------------------------------------|
| Journal:                        | <i>BMJ Open</i>                                                                                                                                                                                                                                                                                                                                                                                                                                                                                                                                                                                                                                                                                                                                                                                                                                                                                                                                                                                                                                                                                                                                                                                                                                                                                                                                            |
| Manuscript ID                   | bmjopen-2019-032763.R1                                                                                                                                                                                                                                                                                                                                                                                                                                                                                                                                                                                                                                                                                                                                                                                                                                                                                                                                                                                                                                                                                                                                                                                                                                                                                                                                     |
| Article Type:                   | Original research                                                                                                                                                                                                                                                                                                                                                                                                                                                                                                                                                                                                                                                                                                                                                                                                                                                                                                                                                                                                                                                                                                                                                                                                                                                                                                                                          |
| Date Submitted by the Author:   | 06-Sep-2019                                                                                                                                                                                                                                                                                                                                                                                                                                                                                                                                                                                                                                                                                                                                                                                                                                                                                                                                                                                                                                                                                                                                                                                                                                                                                                                                                |
| Complete List of Authors:       | <p>McInerney, Carol; The University of Sydney Northern Clinical School, Women and Babies Research; New South Wales Ministry of Health, NSW Biostatistics Training Program</p> <p>Ibiebele, Ibinabo; The University of Sydney Northern Clinical School, Women and Babies Research; Northern Sydney Local Health District, Kolling Institute</p> <p>Ford, Jane; The University of Sydney Northern Clinical School, Women and Babies Research; Northern Sydney Local Health District, Kolling Institute</p> <p>Randall, Deborah; The University of Sydney Northern Clinical School, Women and Babies Research; Northern Sydney Local Health District, Kolling Institute</p> <p>Morris, Jonathan; The University of Sydney Northern Clinical School, Women and Babies Research; Royal North Shore Hospital, Obstetrics and Gynaecology</p> <p>Meharg, David; The University of Sydney Faculty of Health Sciences; The University of Sydney Poche Centre for Indigenous Health</p> <p>Mitchell, Jo ; New South Wales Ministry of Health, Centre for Population Health</p> <p>Milat, Andrew; New South Wales Ministry of Health, Centre for Epidemiology and Evidence</p> <p>Torvaldsen, Siranda; The University of Sydney Northern Clinical School, Women and Babies Research; University of New South Wales School of Public Health and Community Medicine</p> |
| <b>Primary Subject Heading</b>: | Obstetrics and gynaecology                                                                                                                                                                                                                                                                                                                                                                                                                                                                                                                                                                                                                                                                                                                                                                                                                                                                                                                                                                                                                                                                                                                                                                                                                                                                                                                                 |
| Secondary Subject Heading:      | Smoking and tobacco, Epidemiology, Public health                                                                                                                                                                                                                                                                                                                                                                                                                                                                                                                                                                                                                                                                                                                                                                                                                                                                                                                                                                                                                                                                                                                                                                                                                                                                                                           |
| Keywords:                       | Pregnancy, smoking, Aboriginal health, preterm birth, stillbirth, linked data                                                                                                                                                                                                                                                                                                                                                                                                                                                                                                                                                                                                                                                                                                                                                                                                                                                                                                                                                                                                                                                                                                                                                                                                                                                                              |
|                                 |                                                                                                                                                                                                                                                                                                                                                                                                                                                                                                                                                                                                                                                                                                                                                                                                                                                                                                                                                                                                                                                                                                                                                                                                                                                                                                                                                            |

SCHOLARONE™  
Manuscripts

1  
2  
3  
4  
5  
6  
7  
8  
9  
10  
11  
12  
13  
14  
15  
16  
17  
18  
19  
20  
21  
22  
23  
24  
25  
26  
27  
28  
29  
30  
31  
32  
33  
34  
35  
36  
37  
38  
39  
40  
41  
42  
43  
44  
45  
46  
47  
48  
49  
50  
51  
52  
53  
54  
55  
56  
57  
58  
59  
60

# Benefits of not smoking during pregnancy for Australian Aboriginal and Torres Strait Islander women and their babies: a retrospective cohort study using linked data

Carol McInerney,<sup>1,2,3</sup> Ibinabo Ibiebele,<sup>1,3</sup> Jane Ford,<sup>1,3</sup> Deborah Randall,<sup>1,3</sup> Jonathan Morris,<sup>1,3,4</sup> David Meharg,<sup>5,6</sup> Jo Mitchell,<sup>7</sup> Andrew Milat<sup>8</sup> and Siranda Torvaldsen<sup>1,3,9</sup>

<sup>1</sup> The University of Sydney Northern Clinical School, Women and Babies Research, St Leonards, New South Wales, Australia

<sup>2</sup> NSW Biostatistics Training Program, NSW Ministry of Health, Australia

<sup>3</sup> Northern Sydney Local Health District, Kolling Institute, New South Wales, Australia

<sup>4</sup> Department of Obstetrics and Gynaecology, Royal North Shore Hospital, Australia

<sup>5</sup> The University of Sydney, Faculty of Health Sciences, Sydney, New South Wales, Australia.

<sup>6</sup> Poche Centre for Indigenous Health, The University of Sydney, Sydney, New South Wales, Australia.

<sup>7</sup> Centre for Population Health, NSW Ministry of Health, Sydney, Australia

<sup>8</sup> Centre for Epidemiology and Evidence, NSW Ministry of Health, Sydney, Australia

<sup>9</sup> School of Public Health and Community Medicine, UNSW Sydney, Australia

Corresponding author:

Associate Professor Siranda Torvaldsen

Women and Babies Research,

Level 5 Douglas Building,

Royal North Shore Hospital,

St Leonards NSW 2065

AUSTRALIA

Email: [siranda.torvaldsen@sydney.edu.au](mailto:siranda.torvaldsen@sydney.edu.au)

Tel: +612 9462 9812

Keywords: Pregnancy, smoking, Aboriginal health, preterm birth, stillbirth, linked data

Word count: 4,278 (excluding article summary box, references, figure, tables and footnotes)

# Benefits of not smoking during pregnancy for Australian Aboriginal and Torres Strait Islander women and their babies: a retrospective cohort study using linked data

## Abstract

### Objectives

To provide evidence for targeted smoking cessation policy, the aim of this study was to compare pregnancy outcomes of Aboriginal mothers who reported *not* smoking during pregnancy with Aboriginal mothers who reported smoking during pregnancy.

### Design

Population based retrospective cohort study using linked data.

### Setting

New South Wales, the most populous Australian state.

### Population

18,154 singleton babies born to 13,477 Aboriginal mothers between 2010–2014 were identified from routinely collected New South Wales datasets. Aboriginality was determined from birth records and from four linked datasets through an Enhanced Reporting of Aboriginality algorithm.

### Exposure

*Not* smoking at any time during pregnancy.

### Main outcome measures

Unadjusted and adjusted relative risks and 95% confidence intervals from modified Poisson regression were used to examine associations between not smoking during pregnancy and maternal and perinatal outcomes including severe morbidity, inter-hospital transfer, perinatal death, preterm birth and small-for-gestational age. Population attributable fractions (PAFs) were calculated using adjusted relative risks.

### Results

Compared with babies born to mothers who smoked during pregnancy, babies born to non-smoking mothers had a lower risk of all adverse perinatal outcomes including perinatal death (aRR=0.58, 95%CI 0.44–0.76), preterm birth (aRR=0.58, 95%CI 0.53–0.64) and small-for-gestational age (aRR=0.35, 95%CI 0.32–0.39). PAFs(%) were 27% for perinatal death, 26% for preterm birth and 48% for small-for-gestational-age. Compared with women who smoked during pregnancy (n=8,919), those who did not smoke (n=9,235) had a lower risk of being transferred to another hospital (aRR=0.76, 95%CI 0.66–0.89).

### Conclusions

Babies born to women who did not smoke during pregnancy had a lower risk of adverse perinatal outcomes. Rates of adverse outcomes among Aboriginal non-smokers were similar to those among the

1  
2  
3 general population. These results quantify the proportion of adverse perinatal outcomes due to smoking  
4 and highlight why effective smoking cessation programs are urgently required for this population.  
5  
6  
7  
8

## 9 10 Article summary

### 11 12 Strengths and limitations of this study

- 13 • The first study to examine the association between *not* smoking in pregnancy and pregnancy  
14 outcomes among Aboriginal women
- 15 • A large population-based cohort study using whole-of-population linked data
- 16 • To improve ascertainment of Aboriginal status, which is under-recorded on routinely  
17 collected health datasets, we linked four databases and applied an enhanced reporting of  
18 Aboriginality algorithm
- 19 • The inclusion of population attributable fractions quantifies the potential reduction in  
20 adverse perinatal outcomes if it was possible to reduce the smoking during pregnancy rate  
21 to zero.
- 22 • Data on history, heaviness, or passive smoking were not available, nor were data on some  
23 potential confounders such as alcohol consumption  
24  
25  
26  
27  
28

29  
30  
31  
32  
33  
34  
35  
36  
37  
38  
39  
40  
41  
42  
43  
44  
45  
46  
47  
48  
49  
50  
51  
52  
53  
54  
55  
56  
57  
58  
59  
60

review only

## Introduction

In 2008 the Australian federal, state and territory governments committed to reducing the national adult daily smoking rate by 2018, including halving the Aboriginal adult smoking rate.(1) Although smoking rates have substantially declined over this time, they remain high among pregnant Aboriginal women. In 2016, 41% of all pregnant Aboriginal women reported smoking at some time during their pregnancy compared to just 7% of non-Aboriginal women.(2) Smoking during pregnancy is the ‘most important preventable risk factor for maternal and infant health’(3), thus smoking cessation for pregnant Aboriginal women remains a key priority for New South Wales (NSW) Health.(4) For the purposes of this study, Aboriginal and/or Torres Strait Islander people were considered together in one group. The reason for this was the small proportion of Torres Strait Islander people living in NSW (an estimated 2.6% of all females of Aboriginal and/or Torres Strait Islander descent(5))and that some people were recorded as both. We respectfully use the term Aboriginal as Aboriginal people are the original inhabitants of NSW.(6)

Australia’s anti-tobacco campaigns and smoking cessation strategies are among the most comprehensive in the world, and there is growing evidence that programs specifically targeted to Aboriginal Australians are more effective.(7) There have been several campaigns to promote smoking cessation among pregnant Aboriginal mothers with varying efficacy.(8) To date these have been grounded in evidence from a general population. Although the benefits of not smoking during pregnancy are unlikely to be any different for Aboriginal mothers from the general population, quantifying the benefits of not smoking among Aboriginal mothers may be regarded as more relevant by this population and thus have the potential to influence smoking cessation. The benefits of not smoking during pregnancy are well established (9-13), but no previous studies have demonstrated associations between not smoking in pregnancy and positive pregnancy outcomes *among* Aboriginal women. This study aims to compare pregnancy outcomes of mothers who reported not smoking during pregnancy with those who reported any smoking during pregnancy from the Aboriginal population of NSW. Findings from this study will provide the most relevant evidence to date for pregnant Aboriginal women.

## Methods

### Study population and data sources

The study population consisted of all singleton babies born to Aboriginal women residing in NSW between 1 January 2010 and 31 December 2014 and their mothers. This population-based retrospective cohort study used linked data from routinely collected NSW datasets. The study population was identified from all records in the NSW Perinatal Data Collection (‘birth data’) for the period 1 January 2010 to 31 December 2014. All births in the population, including births at NSW public and private hospitals and home births are recorded in the birth data. This surveillance system includes all live births and stillbirths of at least 400 grams birthweight or at least 20 weeks gestation.(14)

All deaths within NSW are registered in the Registry of Births, Deaths and Marriages and fact of death was retrieved from these data between 1 January 2010 and 31 December 2015. Public and private hospital admission records were drawn from the NSW Admitted Patient Data Collection (‘hospital data’)

1  
2  
3 for admissions from 1 September 2009 to 31 December 2014. An additional 4 months of hospital data  
4 were retrieved prior to the start of the study period to allow for admissions to hospital for births early in  
5 2010. Diagnoses coded in the hospital data are applied according to the International Classification of  
6 Diseases, Australian Modification (ICD-10-AM). Records within and across all datasets were  
7 probabilistically linked using personal identifiers by the NSW Centre for Health Record Linkage with an  
8 estimated false linkage rate of less than 5 per 1,000 records.(15) Hospital birth records were those  
9 where the birth was recorded to have occurred between the mother's admission and discharge dates  
10 using the linked birth data. It's estimated that 96% of records from the birth data link to the mother's  
11 and infant's hospital records from the birth.(16)

12  
13  
14  
15  
16 Aboriginal women were defined as those who were recorded as Australian Aboriginal in the birth data  
17 or who were assigned Aboriginal status according to the Enhanced Reporting of Aboriginality (ERA)  
18 algorithm.

### 19 20 21 **Enhanced Reporting of Aboriginality (ERA)**

22 It is widely acknowledged that Aboriginal status is under-recorded on routinely collected health datasets  
23 nationwide.(17) Enhancement of reporting of Aboriginal people using linked records creates a  
24 statistical construct that results in improved information about Aboriginal people. It does not define a  
25 person as being Aboriginal, nor does it replace efforts to improve the overall quality of recording  
26 Aboriginal status at the point of care.

27  
28  
29 Information surrounding individuals' Aboriginal status was pooled via linkage of the birth data, NSW  
30 Registry of Births, Deaths and Marriages birth registrations, hospital data and the NSW Emergency  
31 Department Data Collection. Using this information, a weight of evidence surrounding a woman's  
32 Aboriginal status was determined by a multistage median algorithm.(18) Since multiple datasets were  
33 used and some women had multiple records in each of these datasets, the algorithm initially assigned a  
34 separate status for each woman and dataset. Aboriginal or Torres Strait Islander status was assigned to  
35 a mother if: one or two linked records were available and at least one reported her as Aboriginal; three  
36 or more linked records were available and at least two reported her as Aboriginal. A comparable  
37 algorithm using dataset-specific statuses instead of records was used to determine the inclusion of each  
38 woman in the study population.

39  
40  
41  
42  
43 The enhanced reporting of Aboriginality is a technique used by many research groups.(19-21) Although  
44 this combination of datasets and algorithm has not been used before, similar methods have been found  
45 to minimise the risk of incorrect inclusion while capturing more women than simply relying on a single  
46 record.(22) Details on the algorithm, the data used and the mothers identified through the ERA have  
47 been described in more detail elsewhere.(23)

### 48 49 50 **Exposure**

51 The exposure of interest for this study was not smoking at any time during pregnancy. Mothers who  
52 reported not smoking during pregnancy will henceforth be referred to as non-smokers and those who  
53 reported any smoking during pregnancy are referred to as smokers. To increase ascertainment, birth  
54 data and mother's hospital birth record(s) were used to assign smoking status. If the birth data indicated  
55 that a mother smoked at any time during her pregnancy and/or recorded her as a current smoker within  
56  
57



1  
2  
3 the hospital birth record(s) (according to the ICD-10-AM diagnosis codes Z72.0 and F17) then she was  
4 considered to be a smoker. The sensitivity and specificity of current smoking from the most recent  
5 separation in the hospital data is estimated to be 58.5% and 98.4% respectively.(24) Where a mother  
6 had multiple hospital records associated with the birth and those records contradicted each other  
7 according to smoking status, her smoking status defaulted to that recorded in the birth data.  
8  
9

### 10 Outcomes

11 Maternal outcomes were identified using the birth data and the mother's hospital birth record and  
12 included two binary outcomes: severe maternal morbidity and inter-hospital transfer. Severe maternal  
13 morbidity was defined using a validated composite indicator that captures a broad range of diagnoses  
14 and procedures such as cardiac arrest, renal failure or assisted ventilation.(25) Mothers requiring inter-  
15 hospital transfer were defined as those with at least one record with a mode of separation indicating  
16 transfer or where multiple hospitalisation records were present with differing hospital codes.  
17  
18

19 Perinatal outcomes, including birth outcomes and those occurring within the first 28 days of life for the  
20 baby were retrieved from the birth data and the baby's linked hospital and birth registration records.  
21 These included perinatal death (stillbirth and neonatal death), preterm birth (<37 completed weeks of  
22 gestation), and small for gestational age (birth weight <3<sup>rd</sup> and/or 10<sup>th</sup> percentile for sex and age (26)).  
23 Admissions to a special care nursery (SCN) or neonatal intensive care unit (NICU) were assessed among  
24 an eligible population of babies born in a hospital classified as level 3 or above (NSW Ministry of Health's  
25 *Guide to the Role Delineation of Hospitals*) or a private hospital. Severe neonatal morbidity, measured  
26 according to a validated composite indicator (27), was assessed among all live births.  
27  
28  
29  
30

### 31 Covariates

32 Maternal age and parity were reported according to the birth data. The mother's chronic conditions,  
33 hypertension and diabetes information were obtained from the birth data and the hospital birth  
34 record(s). We used the broad category of any hypertension rather than the specific categories of chronic  
35 hypertension, pregnancy hypertension, preeclampsia and eclampsia, as there is known misclassification  
36 among types of hypertension (28). The NSW ranking of the Australian Bureau of Statistics (ABS) 2011  
37 Socio-Economic Index for Areas (SEIFA) Index of Relative Socio-Economic Disadvantage (IRSD) and the  
38 2011 Remoteness Areas were used to assess the mother's relative socio-economic status and access to  
39 services respectively. Where available, the mother's 2011 Statistical Local Area (SLA) according to her  
40 birth data was used to assign these measures. Otherwise, and for all babies born in 2010, the mother's  
41 2010 SLA was used. Hospital type is an indicator of the size of a hospital and its location (urban or  
42 regional)(29) and was assigned using the hospital code recorded in the birth data.  
43  
44  
45  
46  
47

### 48 Statistical analyses

49 The study population was described using frequencies and percentages by potential confounders and  
50 the mother's smoking status. Summary statistics were calculated by mother's smoking status to  
51 investigate the associations between smoking during pregnancy and maternal and child outcomes. To  
52 estimate the unadjusted and adjusted relative risk (RR) of binary outcomes while accounting for the  
53 correlation within the data (some mothers had more than one baby during the study period), an  
54 extension to the modified Poisson regression (30) was used with an unstructured correlation matrix.  
55 Those observations where data were missing for an outcome were excluded from analysis for that  
56  
57  
58  
59  
60

1  
2  
3 outcome. SAS for Windows 9.4 (SAS Institute, Cary, NC, USA) was used for all data manipulation and  
4 analysis.  
5

6  
7 In view of the established causal relationship between smoking and adverse perinatal outcomes, we  
8 quantified the proportion and number of adverse perinatal outcomes that would not have occurred in  
9 this population if all the mothers had been non-smokers during pregnancy. We used the formula:  $PAF = [P_s(RR_s - 1)] / RR_s$ , where  $P_s$  is the proportion of babies with the outcome whose mothers smoked and  $RR_s$   
10 is the adjusted RR for smokers. The  $RR_s$  is the inverse of the RR for non-smokers.  
11  
12

### 13 **Patient and public involvement**

14 An Aboriginal advisory committee was consulted prior to submission of the study proposal to ethics  
15 committees and throughout the process. The committee provided guidance on presentation and  
16 interpretation of results. It was of particular importance to members of the committee that the results  
17 were framed positively, ie the *benefits* of not smoking, rather than the risks of smoking. It was also  
18 important to committee members that all comparisons were among Aboriginal women and that  
19 Aboriginal women were not compared with non-Aboriginal women. There are plans to develop  
20 culturally appropriate educational material based on the results of this research and in collaboration  
21 with Aboriginal Health Workers and others involved in the care of Aboriginal women who are pregnant  
22 or may be planning a pregnancy.  
23  
24  
25  
26

### 27 **Results**

28  
29 Following exclusion of duplicates (n=76), a total of 487,388 babies were born to 379,116 mothers in  
30 NSW and were assessed for inclusion in this study. Records for 16,904 babies born to 12,720 mothers  
31 who were recorded as Aboriginal in the birth data were available for analysis. An additional 1,921 babies  
32 born to 1,624 mothers were identified as eligible for inclusion in the study using the ERA. Of the total  
33 18,825 babies, 557 were from a multiple birth and 114 were born to mothers who were not residents of  
34 NSW. These babies did not meet the eligibility criteria and were excluded. Thus the final study  
35 population consisted of 18,154 singleton babies born to 13,477 Aboriginal mothers. Figure 1 outlines the  
36 flow of participants in this study.  
37  
38  
39  
40

41 Among the study population, 9,235 (51%) babies were born to non-smoking mothers and 8,919 (49%)  
42 were born to smoking mothers (Table 1). Only two percent of all linked records had contradictory  
43 smoking statuses from the birth and hospital data. For comparison, when smoking status was assigned  
44 only according to the birth data, 52% of babies were born to non-smoking mothers and 48% were born  
45 to smoking mothers. Mothers who reported not smoking at any time during their pregnancy were  
46 generally less disadvantaged than their smoking counterparts; approximately 8.1% of non-smoking  
47 mothers were in the highest SEIFA quintile, compared to just 4.1% of smoking mothers. Non-smoking  
48 mothers were older, lived in less remote regions and had fewer previous pregnancies than smoking  
49 mothers. The number of non-smoking mothers with hypertension (1,106) was almost double that of  
50 smoking mothers (578) and slightly more non-smoking mothers had diabetes (Table 1).  
51  
52  
53  
54

55 The majority (70%) of mothers only had one baby during the study period however a substantial number  
56 had multiple: 25% had two, 4.4% had three and 0.4% had four. For 564 (4%) mothers, their smoking  
57  
58

1  
2  
3 status changed between pregnancies, 6,814 (53%) mothers reported not smoking in all pregnancies  
4 during the study period and 6,099 (47%) consistently reported smoking. For the mothers whose smoking  
5 status changed between pregnancies, 47% changed from smoking to non-smoking and 48% changed  
6 from non-smoking to smoking in all subsequent pregnancies.  
7  
8

9 The rate of severe maternal morbidity was low (<3%) and not significantly different between smoking  
10 and non-smoking mothers (Table 2). The rate of inter-hospital transfer was lower in the non-smoking  
11 group at 3.7% compared with the smoking group (5.1%), with an adjusted relative risk of RR=0.76 (95%  
12 CI 0.66, 0.89).  
13  
14

15 Adverse perinatal outcomes occurred less frequently among babies born to non-smoking mothers (Table  
16 3). Perinatal deaths were rare in both populations however the rate was lower in the non-smoking  
17 group with perinatal death occurring in 1.0% of babies born to non-smoking mothers, compared to 1.8%  
18 in smoking mothers. Also, severe neonatal morbidity and admission to SCN or NICU was less frequent in  
19 babies born to non-smoking mothers when compared to those born to smoking mothers. Overall, the  
20 gestational age of babies from the non-smoking group was closer to term than those from the smoking  
21 group; more babies born to non-smoking mothers (66%) were born between 39 and 41 weeks than  
22 those born to smoking mothers (55%). Preterm birth was considerably less frequent among babies born  
23 to mothers who did not smoke during pregnancy; 8.2% of births to non-smoking mothers were preterm  
24 compared to 14% from smoking mothers. Similarly, babies born to non-smoking mothers were less often  
25 small for gestational age, with 2.0% and 7.0% of these babies having a birthweight below the 3rd and  
26 10th percentiles respectively compared to 7.3% and 20% of babies of smoking mothers. All relative risks  
27 were less than 1, suggesting a reduced risk of all adverse outcomes among babies born to non-smoking  
28 mothers when compared to those born to smoking mothers. Of note were the relative risks for perinatal  
29 death (RR=0.58 95% CI 0.44, 0.76), preterm birth (RR=0.58 95% CI 0.53, 0.64) and small for gestational  
30 age (<10<sup>th</sup> percentile; RR=0.35 95% CI 0.32, 0.39). As indicated by the PAFs (%) in Table 3, more than a  
31 quarter of the perinatal deaths and preterm births were attributable to smoking and almost half the  
32 small for gestational age births. Among this cohort of babies, this equates to 68 perinatal deaths, 540  
33 preterm births and 1,131 small for gestational age (<10<sup>th</sup> percentile) babies attributable to smoking.  
34  
35  
36  
37  
38  
39  
40  
41

## 42 Discussion

43 This study of a recent population of pregnant Aboriginal women clearly demonstrates improved  
44 pregnancy outcomes among Aboriginal mothers who reported not smoking during pregnancy when  
45 compared to Aboriginal mothers who reported smoking during pregnancy. Benefits of not smoking were  
46 found for all the perinatal outcomes we examined. We also found non-smoking mothers had a 24%  
47 lower risk of being transferred to another hospital during the birth admission than smoking mothers of  
48 similar demographics. Inter-hospital transfers may be due to complications arising before, during or  
49 after the birth. This means women are less likely to be away from their family and country during this  
50 challenging time. Although a slightly lower risk of severe maternal morbidity was found in the non-  
51 smoking group, there was not sufficient evidence to suggest a true difference existed as the confidence  
52 interval included 1 (RR=0.92, 95% CI 0.77–1.11). Other risk factors may be more strongly associated with  
53 severe maternal morbidity than smoking.  
54  
55  
56  
57

1  
2  
3 Among babies born to mothers of a similar age, with similar pre-existing conditions (any diabetes or  
4 hypertension), parity and socio-economic status, those with a non-smoking mother had a 42% less risk  
5 of perinatal death and preterm birth, 65% less risk of being small-for-gestational age (<10<sup>th</sup> percentile),  
6 30% less risk of severe neonatal morbidity, and 33% less risk of being admitted to a SCN or NICU than  
7 those born to a mother who smoked at any time during her pregnancy. The reductions in adverse  
8 outcomes for babies born to non-smoking mothers were statistically and clinically significant and  
9 remained so even after adjustment. Encouragingly, despite some rates being marginally higher, overall  
10 very little difference exists between the rates of adverse perinatal outcomes among the non-smoking  
11 Aboriginal mothers in this study and the general NSW population.(14) The high PAFs for the adverse  
12 perinatal outcomes highlight the enormous potential for health improvements in this population. Over a  
13 quarter of the perinatal deaths and preterm births were attributable to smoking. Being born small for  
14 gestational age is associated with short and long-term health sequelae, and these risks are even greater  
15 for babies born with a birthweight less than the third percentile for gestational age and sex. The PAF(%)  
16 was highest (57%) for being born with a birthweight less than the third percentile. Almost half (48%) the  
17 babies born small for gestational age (<10<sup>th</sup> percentile) could have had a normal birthweight ( $\geq 10^{\text{th}}$   
18 percentile) in the absence of smoking. Our results are consistent with a recent study of a cohort of  
19 697,003 children born in Scotland from 1997–2009 (31). In addition to the adverse perinatal outcomes  
20 attributable to smoking, this study followed children until five years of age and found that maternal  
21 smoking during pregnancy also increased the risk of the child being hospitalized with acute respiratory  
22 infections, bronchiolitis, asthma and bacterial meningitis (31).  
23  
24  
25  
26  
27  
28

29  
30 As expected, and similar to findings from other studies, (31, 32) mothers from the non-smoking group  
31 were less disadvantaged, older, resided in less remote regions and had fewer previous pregnancies than  
32 those from the smoking group. Diabetes and hypertension were more prevalent among non-smoking  
33 mothers than smoking mothers. The small difference in prevalence of diabetes (8.7% vs 6.5%) could be  
34 due to the non-smoking group being slightly older than the smoking group. However the prevalence of  
35 hypertension in non-smoking mothers was almost double that of smoking mothers (12% vs 6.5%). Whilst  
36 this finding may surprise some, it is consistent with findings from previous studies (33-36). A systematic  
37 review of 48 studies concluded that smoking during pregnancy reduces the risk of preeclampsia by up to  
38 50% and that there is a dose-response relationship (34). Similar results have been reported when the  
39 outcome includes gestational hypertension as well as preeclampsia, and the protective effect appears to  
40 continue even after women quit smoking later in pregnancy (36). This protective effect may be  
41 mediated via the biological effects of carbon monoxide that is formed during smoking (35). However,  
42 when preeclampsia does occur, the outcomes are much worse for babies whose mothers smoked (33).  
43 Although preeclampsia is associated with adverse pregnancy outcomes, and smoking reduces the  
44 incidence of preeclampsia, the net effect of smoking is still a worsening of pregnancy outcomes and  
45 there are dose-dependent increases in perinatal deaths and SGA babies among mothers who smoke  
46 (33). Hence these findings in no way indicate any benefit to mothers or babies if the mother smokes  
47 during pregnancy.  
48  
49  
50  
51  
52

53  
54 As well as being a national health priority in Australia, reducing smoking during pregnancy is a key  
55 performance indicator in the annual service agreements between the NSW Ministry of Health and Local  
56 Health Districts.(37) As part of this commitment, the Quit for New Life program was established in 2013  
57

1  
2  
3 with the aim to support women having an Aboriginal baby to quit smoking. The program was integrated  
4 into Aboriginal Maternal and Infant Health Services and has supported over 2,500 pregnant women, 950  
5 postnatal women and 1,650 cohabitants in their quit attempt.(38) However, further efforts including  
6 health professional training, expansion to other maternal health services and community programs, and  
7 improved data collection and reporting are required to reduce the prevalence of smoking in pregnancy  
8 in this population. Investment to discourage women, especially young women, from taking up smoking  
9 and encouraging and appropriately supporting smokers to quit need to remain priorities.  
10  
11

12  
13 Health professionals have a critical role in communicating the benefits of not smoking during pregnancy  
14 found in this study. However some practitioners perceive intervention to be ineffective and thus may  
15 not raise this issue with their patients.(39) The highly relevant evidence from this study may increase the  
16 salience of the issue and provide further motivation for health professionals to consistently ask and  
17 advise about smoking.  
18  
19

20 While the health impacts of smoking on maternal and child health are well known (9-13), this study  
21 provides local information that can be used to further engage Australian health professionals and  
22 community members on the benefits of not smoking. Building on the strength and resilience of  
23 Aboriginal people is an important foundation for efforts to reduce smoking among this population.(40)  
24 Using local evidence on the *benefits* of not smoking during pregnancy has the potential to re-frame  
25 health messages for women, their families and communities and to mobilise community action to  
26 achieve better health outcomes.  
27  
28  
29

### 30 **Strengths and limitations**

31 This is the first study we are aware of that examines associations between smoking in pregnancy and  
32 adverse pregnancy outcomes exclusively among Aboriginal and/or Torres Strait Islander women. This  
33 was a large population-based study. Using data linkage, we were able to capture more women through  
34 the ERA, further increasing our sample size. Despite the unavailability of information surrounding some  
35 potential confounders, including individual level socioeconomic status, our findings were consistent with  
36 those among other populations from the literature (9-13). Limited data on the heaviness of smoking  
37 during pregnancy meant that potential dose effects could not be calculated. However, new data around  
38 quitting in pregnancy is available from 2016 onward so there is potential for future work to examine this  
39 phenomenon further. Similarly, no information was available on the mother's history of smoking,  
40 exposure to environmental tobacco smoke or alcohol consumption and so effects from longer term  
41 smoking and potential confounding from alcohol consumption could not be accounted for. A lack of data  
42 surrounding history and heaviness of smoking means that the treatment effects estimated in this study  
43 are likely to be biased toward the null and thus underestimate the true benefits of not smoking in  
44 pregnancy. Under-ascertainment of smoking status would similarly bias toward the null.  
45  
46  
47  
48  
49  
50

### 51 **Conclusions**

52 Babies born to Aboriginal mothers who did not smoke during pregnancy were at a significantly reduced  
53 risk of adverse perinatal outcomes compared to those born to smoking mothers of similar  
54  
55  
56  
57

1  
2  
3 demographics. Rates of these adverse outcomes among Aboriginal women who did not smoke were  
4 very similar to those among the general NSW population.  
5

6 These results reinforce the importance of targeted smoking cessation policy for Aboriginal women.  
7 Barriers to smoking cessation in this population are complex and it is vital that this evidence is provided  
8 concurrently with sufficient support to enable Aboriginal women to quit smoking. Distributing this  
9 information in isolation runs the risk of furthering shame and stress experienced by pregnant women  
10 and may discourage them from seeking further help, highlighting the importance of systematic  
11 approaches to encourage and support Aboriginal women to quit smoking.  
12  
13  
14  
15

## 16 **Acknowledgements**

17 The authors would like to thank the members of the Aboriginal Advisory Committee who provided  
18 valuable advice, the NSW Ministry of Health for providing access to the datasets used and the Centre for  
19 Health Record Linkage for linking these datasets.  
20  
21  
22

## 23 **Footnotes**

### 24 **Copyright**

25 The Corresponding Author has the right to grant on behalf of all authors and does grant on behalf of all  
26 authors, a worldwide licence to the Publishers and its licensees in perpetuity, in all forms, formats and  
27 media (whether known now or created in the future), to i) publish, reproduce, distribute, display and  
28 store the Contribution, ii) translate the Contribution into other languages, create adaptations, reprints,  
29 include within collections and create summaries, extracts and/or, abstracts of the Contribution, iii)  
30 create any other derivative work(s) based on the Contribution, iv) to exploit all subsidiary rights in the  
31 Contribution, v) the inclusion of electronic links from the Contribution to third party material where-  
32 ever it may be located; and, vi) licence any third party to do any or all of the above.  
33  
34  
35  
36  
37

### 38 **Contributors**

39 JMitchell and AM had the initial idea for this study. ST wrote the study proposal and was responsible for  
40 the ethics application and revisions to the manuscript. CM undertook all analyses, with guidance from  
41 ST, II and DR, and drafted the manuscript. JF, JMorris, JMitchell, AM and ST all contributed to the design  
42 of the study and, with DM, the interpretation of the results. All authors commented on drafts and read  
43 and approved the final manuscript. The corresponding author attests that all listed authors meet  
44 authorship criteria and that no others meeting the criteria have been omitted. CM and ST are  
45 guarantors.  
46  
47  
48

### 49 **Statement of Conflicts of Interest**

50 All authors have completed the ICMJE uniform disclosure form at [www.icmje.org/coi\\_disclosure.pdf](http://www.icmje.org/coi_disclosure.pdf) and  
51 declare: CM and ST's salaries came from a Prevention Research Support Program grant from the NSW  
52 Ministry of Health, no other relationships or activities that could appear to have influenced the  
53 submitted work.  
54  
55  
56  
57

### **Funding Statement**

This work was supported by a NSW Ministry of Health Prevention Research Support Program grant. This work was completed while Carol McInerney was employed as a trainee on the NSW Biostatistics Training Program funded by the NSW Ministry of Health. She undertook this work whilst based at the Women and Babies Research, Kolling Institute, Northern Sydney Local Health District. Carol McInerney and Siranda Torvaldsen are supported by the NSW Ministry of Health Prevention Research Support Program grant. The funder had no role in the study design, analysis or interpretation of the data or in the writing of the report. However, the NSW Ministry of Health requires all Biostatistics Trainees to seek their approval before submitting a manuscript for publication.

### **Ethics approval**

Ethics approval for this study was given by the Aboriginal Health and Medical Research Council of New South Wales, Australia (HREC reference number: 1326/17) and was exempt from informed consent requirements as there was no contact with the study population and the authors only had access to de-identified data.

### **Transparency statement**

The lead author affirms that the manuscript is an honest, accurate, and transparent account of the study being reported; that no important aspects of the study have been omitted; and that any discrepancies from the study as planned have been explained.

### **Data sharing**

No additional data are available.

## References

1. Department of Health. Tobacco Control - key facts and figures 2018 [Available from: <http://www.health.gov.au/internet/publications/publishing.nsf/Content/tobacco-control-toc>.
2. Centre for Epidemiology and Evidence. NSW Mothers and Babies 2016. Sydney: NSW Ministry of Health. 2017.
3. Gould GS, Cadet-James Y, Clough AR. Getting over the shock: taking action on Indigenous maternal smoking. *Aust J Prim Health*. 2016;22(4):276-82.
4. NSW Ministry of Health. Snapshot of Tobacco Strategy 2012-2017. 2017.
5. Australian Bureau of Statistics. Estimates of Aboriginal and Torres Strait Islander Australians, June 2011. 2013 [Available from: <http://www.abs.gov.au/ausstats/abs@.nsf/mf/3238.0.55.001>.
6. NSW Department of Health. Communicating positively - A guide to appropriate Aboriginal terminology. Sydney, Australia: NSW Department of Health  
2004.
7. Carson KV, Brinn MP, Peters M, Veale A, Esterman AJ, Smith BJ. Interventions for smoking cessation in Indigenous populations. *Cochrane database of systematic reviews (Online)*. 2012;1.
8. Passey ME, Sanson-Fisher RW, Stirling JM. Supporting Pregnant Aboriginal and Torres Strait Islander Women to Quit Smoking: Views of Antenatal Care Providers and Pregnant Indigenous Women. *Matern Child Health J*. 2014;18(10):2293-9.
9. Cnattingius S. The epidemiology of smoking during pregnancy: smoking prevalence, maternal characteristics, and pregnancy outcomes. *Nicotine & tobacco research : official journal of the Society for Research on Nicotine and Tobacco*. 2004;6 Suppl 2:S125-40.
10. Marufu TC, Ahankari A, Coleman T, Lewis S. Maternal smoking and the risk of still birth: systematic review and meta-analysis. *BMC public health*. 2015;15:239.
11. Mendelsohn C, Gould GS, Oncken C. Management of smoking in pregnant women. *Australian family physician*. 2014;43(1):46-51.
12. Salihi HM, Wilson RE. Epidemiology of prenatal smoking and perinatal outcomes. *Early Hum Dev*. 2007;83(11):713-20.
13. US Department of Health and Human Services. The Health Consequences of Smoking—50 Years of Progress: A Report of the Surgeon General. . In: US Department of Health and Human Services CfDCaP, National Center for Chronic Disease Prevention and Health Promotion, Office on Smoking and Health, editor. Atlanta, GA2014.
14. Centre for Epidemiology and Evidence. NSW Mothers and Babies 2014. Sydney, Australia: NSW Ministry of Health; 2016.
15. Centre for Health Record Linkage [Internet]. Quality Assurance 2018 [Available from: <http://www.cherel.org.au/quality-assurance>.
16. Bentley JP, Ford JB, Taylor LK, Irvine KA, Roberts CL. Investigating linkage rates among probabilistically linked birth and hospitalization records. *BMC Medical Research Methodology*. 2012;12.
17. Australian Institute of Health and Welfare and Australian Bureau of Statistics. National best practice guidelines for data linkage activities relating to Aboriginal and Torres Strait Islander people. Canberra, Australia: AIHW; 2012. Contract No.: Cat. No. IHW 74.
18. Christensen D, Davis G, Draper G, Mitrou F, McKeown S, Lawrence D, et al. Evidence for the use of an algorithm in resolving inconsistent and missing Indigenous status in administrative data collections. *Austr J Soc Iss*. 2014;49(4):423-43.
19. Population and Public Health Division. Improved reporting of Aboriginal and Torres Strait Islander peoples on population datasets in New South Wales using record linkage—a feasibility study. Sydney, Australia: NSW Ministry of Health; 2012.



- 1  
2  
3 20. Xu F, Sullivan EA, Madden RC, Black D, Pulver LR. Improvement of maternal Aboriginality in NSW  
4 birth data. *BMC Med Res Methodol*. 2012;12:8.
- 5 21. Taylor LK, Bentley J, Hunt J, Madden R, McKeown S, Brandt P, Baker D. Enhanced reporting of  
6 deaths among Aboriginal and Torres Strait Islander peoples using linked administrative health datasets.  
7 *BMC Medical Research Methodology*. 2012;12(1).
- 8 22. Gibberd AJ, Simpson JM, Eades SJ. Use of family relationships improved consistency of  
9 identification of Aboriginal people in linked administrative data. *J Clin Epidemiol*. 2017;90:144-55.
- 10 23. McInerney C, Ibiebele I, Torvaldsen S, Ford JB, Morris JM, Nelson M, Randall DA. Defining a  
11 study population using enhanced reporting of Aboriginality and the effects on study outcomes.  
12 *International Journal of Population Data Science*. 2019;In press.
- 13 24. Havard A, Jorm LR, Lujic S. Risk adjustment for smoking identified through tobacco use  
14 diagnoses in hospital data: A validation study. *PLoS ONE*. 2014;9(4).
- 15 25. Roberts CL, Cameron CA, Bell JC, Algert CS, Morris JM. Measuring maternal morbidity in  
16 routinely collected health data: Development and validation of a maternal morbidity outcome indicator.  
17 *Med Care*. 2008;46(8):786-94.
- 18 26. Dobbins TA, Sullivan EA, Roberts CL, Simpson JM. Australian national birthweight percentiles by  
19 sex and gestational age, 1998-2007. *Med J Aust*. 2012;197(5):291-4.
- 20 27. Lain SJ, Algert CS, Nassar N, Bowen JR, Roberts CL. Incidence of severe adverse neonatal  
21 outcomes: Use of a composite indicator in a population cohort. *Matern Child Health J*. 2012;16(3):600-8.
- 22 28. Roberts CL, Bell JC, Ford JB, Hadfield RM, Algert CS, Morris JM. The accuracy of reporting of the  
23 hypertensive disorders of pregnancy in population health data. *Hypertension in Pregnancy*.  
24 2008;27(3):285-97.
- 25 29. Falster MO, Roberts CL, Ford J, Morris J, Kinnear A, Nicholl M. Development of a maternity  
26 hospital classification for use in perinatal research. *NSW Public Health Bulletin*. 2012;23(1-2):12-6.
- 27 30. Zou GY, Donner A. Extension of the modified Poisson regression model to prospective studies  
28 with correlated binary data. *Stat Methods Med Res*. 2013;22(6):661-70.
- 29 31. Lawder R, Whyte B, Wood R, Fischbacher C, Tappin D. Impact of maternal smoking on early  
30 childhood health: a retrospective cohort linked dataset analysis of 697 003 children born in Scotland  
31 1997–2009. *BMJ Open*. 2019;9(0:e023213).
- 32 32. Cnattingius S. The epidemiology of smoking during pregnancy: Smoking prevalence, maternal  
33 characteristics, and pregnancy outcomes. *Nicotine & Tobacco Research*. 2004;6:125-40.
- 34 33. Cnattingius S, Mills JL, Yuen J, Eriksson O, Salonen H. The paradoxical effect of smoking in  
35 preeclamptic pregnancies: smoking reduces the incidence but increases the rates of perinatal mortality,  
36 abruptio placentae, and intrauterine growth restriction. *American Journal of Obstetrics & Gynecology*.  
37 1997;177(1):156-61.
- 38 34. England L, Zhang J. Smoking and risk of preeclampsia: a systematic review. *Frontiers in*  
39 *Bioscience*. 2007;12:2471-83.
- 40 35. Karumanchi SA, Levine RJ. How does smoking reduce the risk of preeclampsia? *Hypertension*.  
41 2010;55(5):1100-1.
- 42 36. Zhang J, Klebanoff MA, Levine RJ, Puri M, Moyer P. The puzzling association between smoking  
43 and hypertension during pregnancy. *American Journal of Obstetrics & Gynecology*. 1999;181(6):1407-  
44 13.
- 45 37. New South Wales Health. NSW Health Service Agreement 2017 [Available from:  
46 <https://www.health.nsw.gov.au/Performance/Documents/service-agreement-generic.pdf>.  
47
- 48 38. Centre for Population Health. Quit for New Life: New South Wales Health,; 2018 [Available from:  
49 <https://www.health.nsw.gov.au/tobacco/Pages/quit-for-new-life.aspx>.  
50  
51  
52  
53  
54  
55  
56  
57  
58  
59  
60

1  
2  
3 39. The Royal Australian College of General Practitioners. Supporting Smoking Cessation 2014  
4 [Available from: [https://www.racgp.org.au/your-practice/guidelines/smoking-cessation/the-role-of-](https://www.racgp.org.au/your-practice/guidelines/smoking-cessation/the-role-of-health-professionals/)  
5 [health-professionals/](https://www.racgp.org.au/your-practice/guidelines/smoking-cessation/the-role-of-health-professionals/).  
6

7 40. Aboriginal Health & Medical Research Council of NSW and NSW Ministry of Health. The ATRAC  
8 Framework: A strategic framework for Aboriginal tobacco resistance and control in NSW. Sydney,  
9 Australia. 2014.

10 41. Chen JS, Roberts CL, Simpson JM, Ford JB. Use of hospitalisation history (lookback) to determine  
11 prevalence of chronic diseases: Impact on modelling of risk factors for haemorrhage in pregnancy. BMC  
12 Medical Research Methodology. 2011;11.  
13  
14  
15  
16  
17  
18  
19  
20  
21  
22  
23  
24  
25  
26  
27  
28  
29  
30  
31  
32  
33  
34  
35  
36  
37  
38  
39  
40  
41  
42  
43  
44  
45  
46  
47  
48  
49  
50  
51  
52  
53  
54  
55  
56  
57  
58  
59  
60

For peer review only

Figure caption:

Figure 1 Flow diagram of mothers and babies eligible for inclusion in the final study population.

Table 1 Demographics at the time of birth of all Aboriginal or Torres Strait Islander mothers who gave birth to at least one singleton baby in NSW between 2010 and 2014 reported for all births and by smoking status during pregnancy.

|                               | All births |     | Non-smoking                   |     | Smoking                      |     |
|-------------------------------|------------|-----|-------------------------------|-----|------------------------------|-----|
|                               | N = 18,154 |     | N <sub>ns</sub> = 9,235 (51%) |     | N <sub>s</sub> = 8,919 (49%) |     |
| Year of baby's birth          | n          | %   | n                             | %   | n                            | %   |
| 2010                          | 3,487      | 19  | 1,740                         | 50* | 1,747                        | 50* |
| 2011                          | 3,380      | 19  | 1,638                         | 48* | 1,742                        | 52* |
| 2012                          | 3,680      | 20  | 1,833                         | 50* | 1,847                        | 50* |
| 2013                          | 3,716      | 20  | 1,944                         | 52* | 1,772                        | 48* |
| 2014                          | 3,891      | 21  | 2,080                         | 53* | 1,811                        | 47* |
| <b>Maternal age</b>           |            |     |                               |     |                              |     |
| Under 20                      | 3,214      | 18  | 1,568                         | 17  | 1,646                        | 19  |
| 20–24                         | 6,014      | 33  | 2,983                         | 32  | 3,031                        | 34  |
| 25–29                         | 4,608      | 25  | 2,381                         | 26  | 2,227                        | 25  |
| 30–34                         | 2,729      | 15  | 1,455                         | 16  | 1,274                        | 14  |
| 35 and over                   | 1,589      | 8.8 | 848                           | 9.2 | 741                          | 8.3 |
| Total                         | 18,154     | 100 | 9,235                         | 100 | 8,919                        | 100 |
| <b>Parity</b>                 |            |     |                               |     |                              |     |
| 0                             | 6,259      | 35  | 3,720                         | 40  | 2,539                        | 29  |
| 1                             | 4,709      | 26  | 2,589                         | 28  | 2,120                        | 24  |
| 2                             | 3,107      | 17  | 1,490                         | 16  | 1,617                        | 18  |
| 3+                            | 4,072      | 22  | 1,431                         | 16  | 2,641                        | 30  |
| Total                         | 18,147     | 100 | 9,230                         | 100 | 8,917                        | 100 |
| <b>SEIFA IRSD quintiles**</b> |            |     |                               |     |                              |     |
| 1st – most disadvantaged      | 4,827      | 27  | 2,131                         | 23  | 2,696                        | 30  |
| 2nd                           | 3,674      | 20  | 1,887                         | 21  | 1,787                        | 20  |
| 3rd                           | 5,375      | 30  | 2,806                         | 31  | 2,569                        | 29  |
| 4th                           | 3,068      | 17  | 1,617                         | 18  | 1,451                        | 16  |
| 5th – least disadvantaged     | 1,115      | 6.2 | 748                           | 8.1 | 367                          | 4.1 |
| Total                         | 18,059     | 100 | 9,189                         | 100 | 8,870                        | 100 |
| <b>Remoteness area</b>        |            |     |                               |     |                              |     |
| Major cities                  | 4,193      | 23  | 2,246                         | 24  | 1,947                        | 22  |
| Inner regional                | 6,147      | 34  | 3,310                         | 36  | 2,837                        | 32  |
| Outer regional                | 6,097      | 34  | 2,966                         | 32  | 3,131                        | 35  |
| Remote                        | 1,027      | 5.7 | 421                           | 4.6 | 606                          | 6.8 |
| Very remote                   | 595        | 3.3 | 245                           | 2.7 | 350                          | 4.0 |
| Total                         | 18,059     | 100 | 9,188                         | 100 | 8,871                        | 100 |

| <b>Hospital level</b>                 |        |     |       |     |       |     |
|---------------------------------------|--------|-----|-------|-----|-------|-----|
| Tertiary                              | 4,099  | 23  | 2,108 | 23  | 1,991 | 22  |
| Small and medium urban                | 308    | 1.7 | 178   | 1.8 | 130   | 1.5 |
| Large urban                           | 2,895  | 16  | 1,607 | 9   | 1,288 | 14  |
| Small regional                        | 3,441  | 19  | 1,519 | 16  | 1,922 | 22  |
| Medium regional                       | 3,042  | 17  | 1,550 | 17  | 1,492 | 17  |
| Large regional                        | 3,897  | 21  | 1,896 | 21  | 2,001 | 22  |
| Private                               | 336    | 1.7 | 323   | 3.2 | 13    | 0.2 |
| Other                                 | 136    | 0.7 | 54    | 0.6 | 82    | 0.9 |
| Total                                 | 18,154 | 100 | 9,235 | 100 | 8,919 | 100 |
| <b>Chronic conditions<sup>^</sup></b> |        |     |       |     |       |     |
| Yes                                   | 343    | 1.9 | 147   | 1.6 | 196   | 2.2 |
| Total                                 | 18,154 | 100 | 9,235 | 100 | 8,919 | 100 |
| <b>Any hypertension</b>               |        |     |       |     |       |     |
| Yes                                   | 1,684  | 9.3 | 1,106 | 12  | 578   | 6.5 |
| Total                                 | 18,154 | 100 | 9,235 | 100 | 8,919 | 100 |
| <b>Any diabetes</b>                   |        |     |       |     |       |     |
| Yes                                   | 1,413  | 7.8 | 804   | 8.7 | 609   | 6.5 |
| Total                                 | 18,154 | 100 | 9,235 | 100 | 8,919 | 100 |

\* Percentage of all births within each year.

\*\*Socio-Economic Index for Areas – Index of Relative Socio-Economic Disadvantage (SEIFA IRSD). When ranking areas within NSW in order of their relative disadvantage, the lowest 20% (most disadvantaged) fall in the 1<sup>st</sup> quintile and the highest 20% (least disadvantaged) fall in 5<sup>th</sup> quintile.

<sup>^</sup>Chronic conditions encompasses renal, cardiac, thyroid, asthma, psychiatric, and other autoimmune conditions(41).

Table 2 Frequencies of maternal outcomes at the time of birth of all Aboriginal mothers by smoking status during pregnancy.

|                                  | All births |     | Non-smoking             |     | Smoking                |     | Unadjusted           | Adjusted               |
|----------------------------------|------------|-----|-------------------------|-----|------------------------|-----|----------------------|------------------------|
|                                  | N = 18,154 |     | N <sub>ns</sub> = 9,235 |     | N <sub>s</sub> = 8,919 |     |                      |                        |
|                                  | n          | %   | n                       | %   | n                      | %   | RR (95% CI)          | RR (95% CI)            |
| <b>Severe maternal morbidity</b> |            |     |                         |     |                        |     |                      |                        |
| Yes                              | 523        | 2.9 | 257                     | 2.8 | 266                    | 3.0 | 0.94<br>(0.79, 1.12) | 0.92*<br>(0.77, 1.11)  |
| <b>Inter-hospital transfer</b>   |            |     |                         |     |                        |     |                      |                        |
| Yes                              | 793        | 4.4 | 337                     | 3.7 | 456                    | 5.1 | 0.73<br>(0.63, 0.84) | 0.76**<br>(0.66, 0.89) |

\*adjusted for maternal age, any hypertension, any diabetes, parity and socio-economic status (SEIFA).

\*\* adjusted for maternal age, any hypertension, any diabetes, parity and remoteness area.

Table 3 Frequencies of perinatal outcomes among all babies born to Aboriginal or Torres Strait Islander mothers by maternal smoking status.

|                                                                              | NSW population | All births |     | Non-smoking                        |       | Smoking                |       | Unadjusted           | Adjusted*            | PAF (%) |
|------------------------------------------------------------------------------|----------------|------------|-----|------------------------------------|-------|------------------------|-------|----------------------|----------------------|---------|
|                                                                              |                | N = 18,154 |     | N <sub>ns</sub> = 9,235            |       | N <sub>s</sub> = 8,919 |       |                      |                      |         |
| Preterm birth (<37 wks)                                                      | %              | n          | %   | n                                  | %     | n                      | %     | RR (95% CI)          | RR (95% CI)          |         |
| Yes                                                                          | 8              | 2,045      | 11  | 760                                | 8.2   | 1,285                  | 14    | 0.59<br>(0.54, 0.64) | 0.58<br>(0.53, 0.64) | 26      |
| Total                                                                        |                | 18,154     | 100 | 9,235                              | 100   | 8,919                  | 100   |                      |                      |         |
| <b>Small for gestational age (&lt;3<sup>rd</sup> population percentile)</b>  |                |            |     |                                    |       |                        |       |                      |                      |         |
| Yes                                                                          | 3              | 835        | 4.6 | 183                                | 2.0   | 652                    | 7.3   | 0.28<br>(0.23, 0.32) | 0.27<br>(0.23, 0.32) | 57      |
| Total                                                                        |                | 18,132     | 100 | 9,229                              | 100   | 8,903                  | 100   |                      |                      |         |
| <b>Small for gestational age (&lt;10<sup>th</sup> population percentile)</b> |                |            |     |                                    |       |                        |       |                      |                      |         |
| Yes                                                                          | 10             | 2,381      | 13  | 641                                | 7.0   | 1,740                  | 20    | 0.36<br>(0.33, 0.39) | 0.35<br>(0.32, 0.39) | 48      |
| Total                                                                        |                | 18,132     | 100 | 9,229                              | 100   | 8,903                  | 100   |                      |                      |         |
| <b>Severe neonatal morbidity</b>                                             |                |            |     | <b>Among live births only</b>      |       |                        |       |                      |                      |         |
| Yes                                                                          | 5              | 1,470      | 8.2 | 636                                | 6.9   | 834                    | 9.5   | 0.74<br>(0.67, 0.81) | 0.70<br>(0.63, 0.77) | 17      |
| Total                                                                        |                | 17,978     | 100 | 9,169                              | 100   | 8,809                  | 100   |                      |                      |         |
| <b>Admission to SCN or NICU<sup>^</sup></b>                                  |                |            |     |                                    |       |                        |       |                      |                      |         |
| Yes                                                                          | 15             | 3,957      | 22  | 1,645                              | 18    | 2,312                  | 26    | 0.70<br>(0.66, 0.75) | 0.66<br>(0.63, 0.70) | 20      |
| Total                                                                        |                | 17,809     | 100 | 9,059                              | 100   | 8,750                  | 100   |                      |                      |         |
| <b>Perinatal death</b>                                                       |                |            |     | <b>Rate per 1,000 total births</b> |       |                        |       |                      |                      |         |
| Yes                                                                          | 8              | 254        | 14  | 92                                 | 10**  | 162                    | 18**  | 0.54<br>(0.42, 0.70) | 0.58<br>(0.44, 0.76) | 27      |
| Stillborn                                                                    | 6              | 162        |     | 60                                 | 6.5** | 102                    | 11**  | 0.57<br>(0.41, 0.78) | 0.60<br>(0.43, 0.84) | 20      |
|                                                                              |                |            |     | <b>Rate per 1,000 live births</b>  |       |                        |       |                      |                      |         |
| Neonatal death                                                               | 2              | 92         |     | 32                                 | 3.5^^ | 60                     | 6.8^^ | 0.50                 | 0.54                 | 30      |



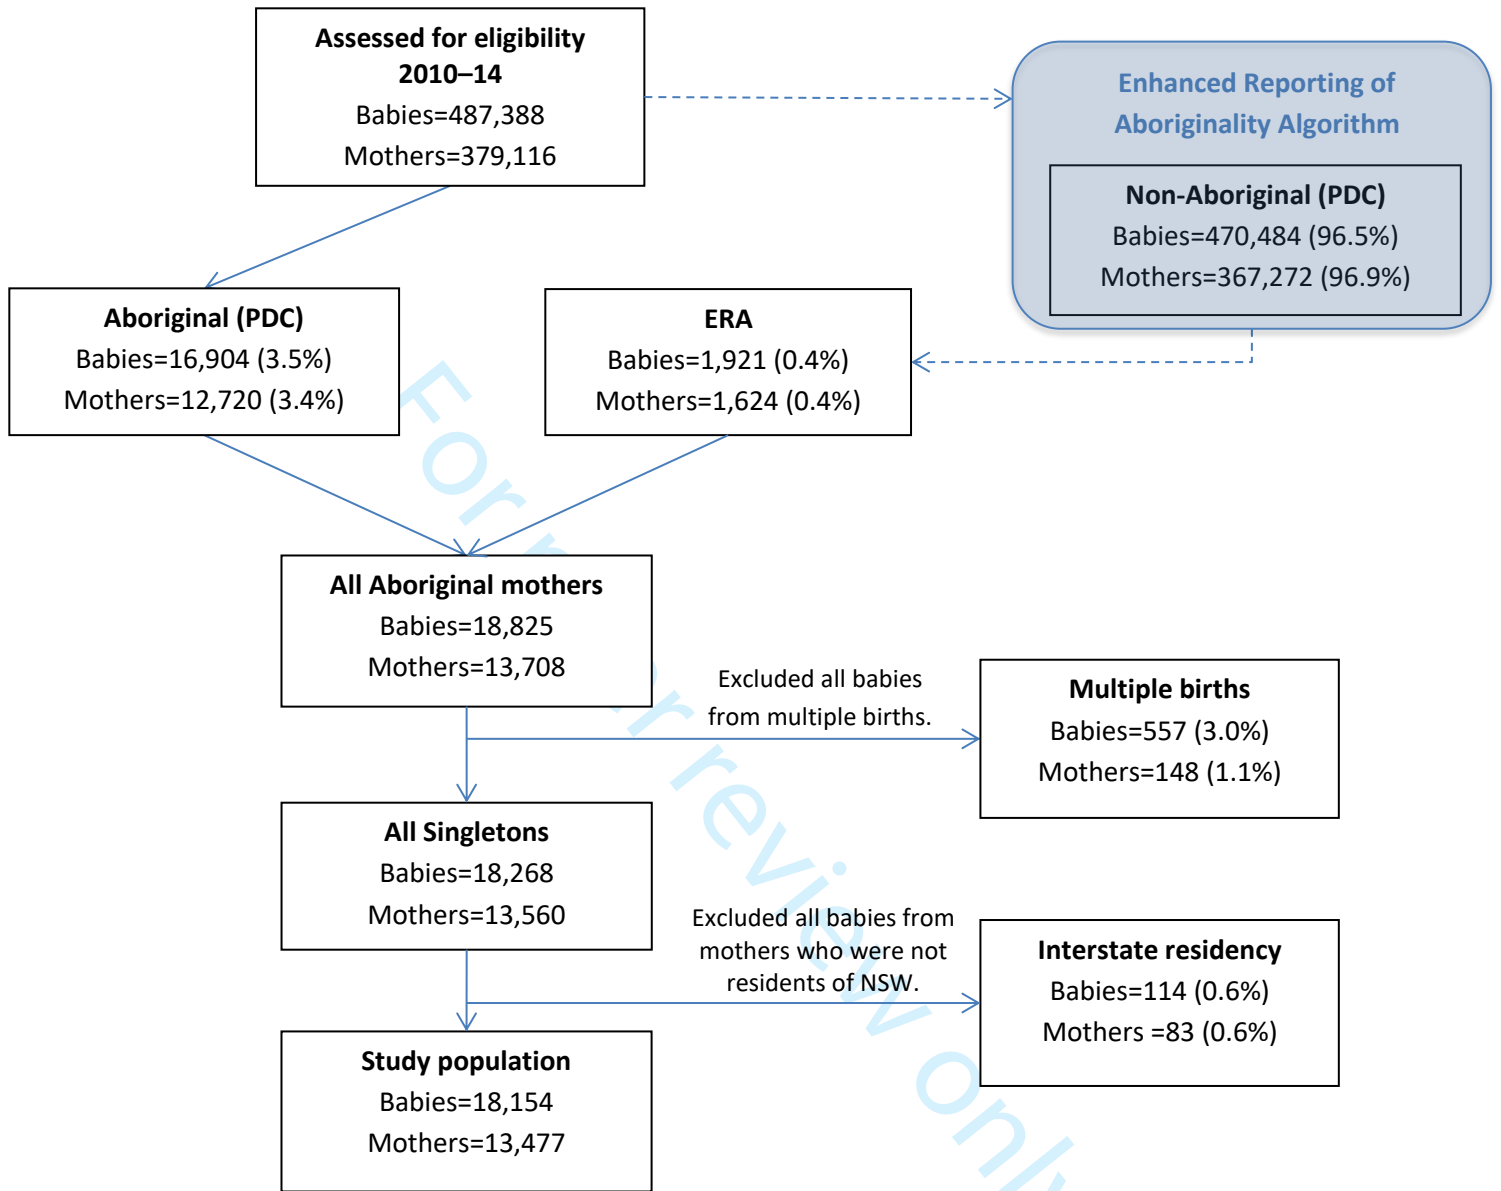

Figure 1 Flow diagram of mothers and babies eligible for inclusion in the final study population.



STROBE Statement—Checklist of items that should be included in reports of *cohort studies*  
**Manuscript for: Benefits of not smoking during pregnancy for Australian Aboriginal and Torres Strait Islander women and their babies: a retrospective cohort study using linked data**

|                           | Item No | Recommendation                                                                                                                                                                                    | Page No     |
|---------------------------|---------|---------------------------------------------------------------------------------------------------------------------------------------------------------------------------------------------------|-------------|
| <b>Title and abstract</b> | 1       | (a) Indicate the study's design with a commonly used term in the title or the abstract                                                                                                            | 1           |
|                           |         | (b) Provide in the abstract an informative and balanced summary of what was done and what was found                                                                                               | 1           |
| <b>Introduction</b>       |         |                                                                                                                                                                                                   |             |
| Background/rationale      | 2       | Explain the scientific background and rationale for the investigation being reported                                                                                                              | 2           |
| Objectives                | 3       | State specific objectives, including any prespecified hypotheses                                                                                                                                  | 2           |
| <b>Methods</b>            |         |                                                                                                                                                                                                   |             |
| Study design              | 4       | Present key elements of study design early in the paper                                                                                                                                           | 2           |
| Setting                   | 5       | Describe the setting, locations, and relevant dates, including periods of recruitment, exposure, follow-up, and data collection                                                                   | 2           |
| Participants              | 6       | (a) Give the eligibility criteria, and the sources and methods of selection of participants. Describe methods of follow-up                                                                        | 2-3         |
|                           |         | (b) For matched studies, give matching criteria and number of exposed and unexposed                                                                                                               | 2-3         |
| Variables                 | 7       | Clearly define all outcomes, exposures, predictors, potential confounders, and effect modifiers. Give diagnostic criteria, if applicable                                                          | 3-4         |
| Data sources/measurement  | 8*      | For each variable of interest, give sources of data and details of methods of assessment (measurement). Describe comparability of assessment methods if there is more than one group              | 3-4         |
| Bias                      | 9       | Describe any efforts to address potential sources of bias                                                                                                                                         | 4           |
| Study size                | 10      | Explain how the study size was arrived at                                                                                                                                                         | 2           |
| Quantitative variables    | 11      | Explain how quantitative variables were handled in the analyses. If applicable, describe which groupings were chosen and why                                                                      | 4           |
| Statistical methods       | 12      | (a) Describe all statistical methods, including those used to control for confounding                                                                                                             | 4-5         |
|                           |         | (b) Describe any methods used to examine subgroups and interactions                                                                                                                               |             |
|                           |         | (c) Explain how missing data were addressed                                                                                                                                                       | 5           |
|                           |         | (d) If applicable, explain how loss to follow-up was addressed                                                                                                                                    |             |
|                           |         | (e) Describe any sensitivity analyses                                                                                                                                                             |             |
| <b>Results</b>            |         |                                                                                                                                                                                                   |             |
| Participants              | 13*     | (a) Report numbers of individuals at each stage of study—eg numbers potentially eligible, examined for eligibility, confirmed eligible, included in the study, completing follow-up, and analysed | Fig 1       |
|                           |         | (b) Give reasons for non-participation at each stage                                                                                                                                              | Fig 1       |
|                           |         | (c) Consider use of a flow diagram                                                                                                                                                                | Fig 1       |
| Descriptive data          | 14*     | (a) Give characteristics of study participants (eg demographic, clinical, social) and information on exposures and potential confounders                                                          | Table 1     |
|                           |         | (b) Indicate number of participants with missing data for each variable of interest                                                                                                               | Table 1,2,3 |
|                           |         | (c) Summarise follow-up time (eg, average and total amount)                                                                                                                                       |             |
| Outcome data              | 15*     | Report numbers of outcome events or summary measures over time                                                                                                                                    | Table       |

2,3

|    |                          |    |                                                                                |
|----|--------------------------|----|--------------------------------------------------------------------------------|
| 1  |                          |    | 2,3                                                                            |
| 2  |                          |    |                                                                                |
| 3  | Main results             | 16 | (a) Give unadjusted estimates and, if applicable, confounder-adjusted          |
| 4  |                          |    | estimates and their precision (eg, 95% confidence interval). Make clear        |
| 5  |                          |    | which confounders were adjusted for and why they were included                 |
| 6  |                          |    | (b) Report category boundaries when continuous variables were                  |
| 7  |                          |    | categorized                                                                    |
| 8  |                          |    | (c) If relevant, consider translating estimates of relative risk into absolute |
| 9  |                          |    | risk for a meaningful time period                                              |
| 10 |                          |    |                                                                                |
| 11 | Other analyses           | 17 | Report other analyses done—eg analyses of subgroups and interactions,          |
| 12 |                          |    | and sensitivity analyses                                                       |
| 13 |                          |    |                                                                                |
| 14 | <b>Discussion</b>        |    |                                                                                |
| 15 | Key results              | 18 | Summarise key results with reference to study objectives                       |
| 16 |                          |    | 6                                                                              |
| 17 | Limitations              | 19 | Discuss limitations of the study, taking into account sources of potential     |
| 18 |                          |    | bias or imprecision. Discuss both direction and magnitude of any               |
| 19 |                          |    | potential bias                                                                 |
| 20 |                          |    | 8                                                                              |
| 21 | Interpretation           | 20 | Give a cautious overall interpretation of results considering objectives,      |
| 22 |                          |    | limitations, multiplicity of analyses, results from similar studies, and       |
| 23 |                          |    | other relevant evidence                                                        |
| 24 |                          |    | 6,7                                                                            |
| 25 | Generalisability         | 21 | Discuss the generalisability (external validity) of the study results          |
| 26 |                          |    | 8                                                                              |
| 27 | <b>Other information</b> |    |                                                                                |
| 28 | Funding                  | 22 | Give the source of funding and the role of the funders for the present         |
| 29 |                          |    | study and, if applicable, for the original study on which the present          |
| 30 |                          |    | article is based                                                               |
| 31 |                          |    | 10                                                                             |

\*Give information separately for exposed and unexposed groups.

**Note:** An Explanation and Elaboration article discusses each checklist item and gives methodological background and published examples of transparent reporting. The STROBE checklist is best used in conjunction with this article (freely available on the Web sites of PLoS Medicine at <http://www.plosmedicine.org/>, Annals of Internal Medicine at <http://www.annals.org/>, and Epidemiology at <http://www.epidem.com/>). Information on the STROBE Initiative is available at <http://www.strobe-statement.org>.

# BMJ Open

## Benefits of not smoking during pregnancy for Australian Aboriginal and Torres Strait Islander women and their babies: a retrospective cohort study using linked data

|                                 |                                                                                                                                                                                                                                                                                                                                                                                                                                                                                                                                                                                                                                                                                                                                                                                                                                                                                                                                                                                                                                                                                                                                                                                                                                                                                                                                                            |
|---------------------------------|------------------------------------------------------------------------------------------------------------------------------------------------------------------------------------------------------------------------------------------------------------------------------------------------------------------------------------------------------------------------------------------------------------------------------------------------------------------------------------------------------------------------------------------------------------------------------------------------------------------------------------------------------------------------------------------------------------------------------------------------------------------------------------------------------------------------------------------------------------------------------------------------------------------------------------------------------------------------------------------------------------------------------------------------------------------------------------------------------------------------------------------------------------------------------------------------------------------------------------------------------------------------------------------------------------------------------------------------------------|
| Journal:                        | <i>BMJ Open</i>                                                                                                                                                                                                                                                                                                                                                                                                                                                                                                                                                                                                                                                                                                                                                                                                                                                                                                                                                                                                                                                                                                                                                                                                                                                                                                                                            |
| Manuscript ID                   | bmjopen-2019-032763.R2                                                                                                                                                                                                                                                                                                                                                                                                                                                                                                                                                                                                                                                                                                                                                                                                                                                                                                                                                                                                                                                                                                                                                                                                                                                                                                                                     |
| Article Type:                   | Original research                                                                                                                                                                                                                                                                                                                                                                                                                                                                                                                                                                                                                                                                                                                                                                                                                                                                                                                                                                                                                                                                                                                                                                                                                                                                                                                                          |
| Date Submitted by the Author:   | 08-Oct-2019                                                                                                                                                                                                                                                                                                                                                                                                                                                                                                                                                                                                                                                                                                                                                                                                                                                                                                                                                                                                                                                                                                                                                                                                                                                                                                                                                |
| Complete List of Authors:       | <p>McInerney, Carol; The University of Sydney Northern Clinical School, Women and Babies Research; New South Wales Ministry of Health, NSW Biostatistics Training Program</p> <p>Ibiebele, Ibinabo; The University of Sydney Northern Clinical School, Women and Babies Research; Northern Sydney Local Health District, Kolling Institute</p> <p>Ford, Jane; The University of Sydney Northern Clinical School, Women and Babies Research; Northern Sydney Local Health District, Kolling Institute</p> <p>Randall, Deborah; The University of Sydney Northern Clinical School, Women and Babies Research; Northern Sydney Local Health District, Kolling Institute</p> <p>Morris, Jonathan; The University of Sydney Northern Clinical School, Women and Babies Research; Royal North Shore Hospital, Obstetrics and Gynaecology</p> <p>Meharg, David; The University of Sydney Faculty of Health Sciences; The University of Sydney Poche Centre for Indigenous Health</p> <p>Mitchell, Jo ; New South Wales Ministry of Health, Centre for Population Health</p> <p>Milat, Andrew; New South Wales Ministry of Health, Centre for Epidemiology and Evidence</p> <p>Torvaldsen, Siranda; The University of Sydney Northern Clinical School, Women and Babies Research; University of New South Wales School of Public Health and Community Medicine</p> |
| <b>Primary Subject Heading</b>: | Obstetrics and gynaecology                                                                                                                                                                                                                                                                                                                                                                                                                                                                                                                                                                                                                                                                                                                                                                                                                                                                                                                                                                                                                                                                                                                                                                                                                                                                                                                                 |
| Secondary Subject Heading:      | Smoking and tobacco, Epidemiology, Public health                                                                                                                                                                                                                                                                                                                                                                                                                                                                                                                                                                                                                                                                                                                                                                                                                                                                                                                                                                                                                                                                                                                                                                                                                                                                                                           |
| Keywords:                       | Pregnancy, smoking, Aboriginal health, preterm birth, stillbirth, linked data                                                                                                                                                                                                                                                                                                                                                                                                                                                                                                                                                                                                                                                                                                                                                                                                                                                                                                                                                                                                                                                                                                                                                                                                                                                                              |
|                                 |                                                                                                                                                                                                                                                                                                                                                                                                                                                                                                                                                                                                                                                                                                                                                                                                                                                                                                                                                                                                                                                                                                                                                                                                                                                                                                                                                            |

SCHOLARONE™  
Manuscripts

1  
2  
3  
4  
5  
6  
7  
8  
9  
10  
11  
12  
13  
14  
15  
16  
17  
18  
19  
20  
21  
22  
23  
24  
25  
26  
27  
28  
29  
30  
31  
32  
33  
34  
35  
36  
37  
38  
39  
40  
41  
42  
43  
44  
45  
46  
47  
48  
49  
50  
51  
52  
53  
54  
55  
56  
57  
58  
59  
60

# Benefits of not smoking during pregnancy for Australian Aboriginal and Torres Strait Islander women and their babies: a retrospective cohort study using linked data

Carol McInerney,<sup>1,2,3</sup> Ibinabo Ibiebele,<sup>1,3</sup> Jane Ford,<sup>1,3</sup> Deborah Randall,<sup>1,3</sup> Jonathan Morris,<sup>1,3,4</sup> David Meharg,<sup>5,6</sup> Jo Mitchell,<sup>7</sup> Andrew Milat<sup>8</sup> and Siranda Torvaldsen<sup>1,3,9</sup>

<sup>1</sup> The University of Sydney Northern Clinical School, Women and Babies Research, St Leonards, New South Wales, Australia

<sup>2</sup> NSW Biostatistics Training Program, NSW Ministry of Health, Australia

<sup>3</sup> Northern Sydney Local Health District, Kolling Institute, New South Wales, Australia

<sup>4</sup> Department of Obstetrics and Gynaecology, Royal North Shore Hospital, Australia

<sup>5</sup> The University of Sydney, Faculty of Health Sciences, Sydney, New South Wales, Australia.

<sup>6</sup> Poche Centre for Indigenous Health, The University of Sydney, Sydney, New South Wales, Australia.

<sup>7</sup> Centre for Population Health, NSW Ministry of Health, Sydney, Australia

<sup>8</sup> Centre for Epidemiology and Evidence, NSW Ministry of Health, Sydney, Australia

<sup>9</sup> School of Public Health and Community Medicine, UNSW Sydney, Australia

Corresponding author:

Associate Professor Siranda Torvaldsen

Women and Babies Research,

Level 5 Douglas Building,

Royal North Shore Hospital,

St Leonards NSW 2065

AUSTRALIA

Email: [siranda.torvaldsen@sydney.edu.au](mailto:siranda.torvaldsen@sydney.edu.au)

Tel: +612 9462 9812

Keywords: Pregnancy, smoking, Aboriginal health, preterm birth, stillbirth, linked data

Word count: 4,278 (excluding article summary box, references, figure, tables and footnotes)

# Benefits of not smoking during pregnancy for Australian Aboriginal and Torres Strait Islander women and their babies: a retrospective cohort study using linked data

## Abstract

### Objectives

To provide evidence for targeted smoking cessation policy, the aim of this study was to compare pregnancy outcomes of Aboriginal mothers who reported *not* smoking during pregnancy with Aboriginal mothers who reported smoking during pregnancy.

### Design

Population based retrospective cohort study using linked data.

### Setting

New South Wales, the most populous Australian state.

### Population

18,154 singleton babies born to 13,477 Aboriginal mothers between 2010–2014 were identified from routinely collected New South Wales datasets. Aboriginality was determined from birth records and from four linked datasets through an Enhanced Reporting of Aboriginality algorithm.

### Exposure

*Not* smoking at any time during pregnancy.

### Main outcome measures

Unadjusted and adjusted relative risks and 95% confidence intervals from modified Poisson regression were used to examine associations between not smoking during pregnancy and maternal and perinatal outcomes including severe morbidity, inter-hospital transfer, perinatal death, preterm birth and small-for-gestational age. Population attributable fractions (PAFs) were calculated using adjusted relative risks.

### Results

Compared with babies born to mothers who smoked during pregnancy, babies born to non-smoking mothers had a lower risk of all adverse perinatal outcomes including perinatal death (aRR=0.58, 95%CI 0.44–0.76), preterm birth (aRR=0.58, 95%CI 0.53–0.64) and small-for-gestational age (aRR=0.35, 95%CI 0.32–0.39). PAFs(%) were 27% for perinatal death, 26% for preterm birth and 48% for small-for-gestational-age. Compared with women who smoked during pregnancy (n=8,919), those who did not smoke (n=9,235) had a lower risk of being transferred to another hospital (aRR=0.76, 95%CI 0.66–0.89).

### Conclusions

Babies born to women who did not smoke during pregnancy had a lower risk of adverse perinatal outcomes. Rates of adverse outcomes among Aboriginal non-smokers were similar to those among the

1  
2  
3 general population. These results quantify the proportion of adverse perinatal outcomes due to smoking  
4 and highlight why effective smoking cessation programs are urgently required for this population.  
5  
6  
7  
8

## 9 10 Article summary

### 11 12 Strengths and limitations of this study

- 13 • The first study to examine the association between *not* smoking in pregnancy and pregnancy  
14 outcomes among Aboriginal women
- 15 • A large population-based cohort study using whole-of-population linked data
- 16 • To improve ascertainment of Aboriginal status, which is under-recorded on routinely  
17 collected health datasets, we linked four databases and applied an enhanced reporting of  
18 Aboriginality algorithm
- 19 • The inclusion of population attributable fractions quantifies the potential reduction in  
20 adverse perinatal outcomes if it was possible to reduce the smoking during pregnancy rate  
21 to zero.
- 22 • Data on history, heaviness, or passive smoking were not available, nor were data on some  
23 potential confounders such as alcohol consumption  
24  
25  
26  
27  
28

29  
30  
31  
32  
33  
34  
35  
36  
37  
38  
39  
40  
41  
42  
43  
44  
45  
46  
47  
48  
49  
50  
51  
52  
53  
54  
55  
56  
57  
58  
59  
60

review only

## Introduction

In 2008 the Australian federal, state and territory governments committed to reducing the national adult daily smoking rate by 2018, including halving the Aboriginal adult smoking rate.(1) Although smoking rates have substantially declined over this time, they remain high among pregnant Aboriginal women. In 2016, 41% of all pregnant Aboriginal women reported smoking at some time during their pregnancy compared to just 7% of non-Aboriginal women.(2) Smoking during pregnancy is the ‘most important preventable risk factor for maternal and infant health’(3), thus smoking cessation for pregnant Aboriginal women remains a key priority for New South Wales (NSW) Health.(4) For the purposes of this study, Aboriginal and/or Torres Strait Islander people were considered together in one group. The reason for this was the small proportion of Torres Strait Islander people living in NSW (an estimated 2.6% of all females of Aboriginal and/or Torres Strait Islander descent(5))and that some people were recorded as both. We respectfully use the term Aboriginal as Aboriginal people are the original inhabitants of NSW.(6)

Australia’s anti-tobacco campaigns and smoking cessation strategies are among the most comprehensive in the world, and there is growing evidence that programs specifically targeted to Aboriginal Australians are more effective.(7) There have been several campaigns to promote smoking cessation among pregnant Aboriginal mothers with varying efficacy.(8) To date these have been grounded in evidence from a general population. Although the benefits of not smoking during pregnancy are unlikely to be any different for Aboriginal mothers from the general population, quantifying the benefits of not smoking among Aboriginal mothers may be regarded as more relevant by this population and thus have the potential to influence smoking cessation. The benefits of not smoking during pregnancy are well established (9-13), but no previous studies have demonstrated associations between not smoking in pregnancy and positive pregnancy outcomes *among* Aboriginal women. This study aims to compare pregnancy outcomes of mothers who reported not smoking during pregnancy with those who reported any smoking during pregnancy from the Aboriginal population of NSW. Findings from this study will provide the most relevant evidence to date for pregnant Aboriginal women.

## Methods

### Study population and data sources

The study population consisted of all singleton babies born to Aboriginal women residing in NSW between 1 January 2010 and 31 December 2014 and their mothers. This population-based retrospective cohort study used linked data from routinely collected NSW datasets. The study population was identified from all records in the NSW Perinatal Data Collection (‘birth data’) for the period 1 January 2010 to 31 December 2014. All births in the population, including births at NSW public and private hospitals and home births are recorded in the birth data. This surveillance system includes all live births and stillbirths of at least 400 grams birthweight or at least 20 weeks gestation.(14)

All deaths within NSW are registered in the Registry of Births, Deaths and Marriages and fact of death was retrieved from these data between 1 January 2010 and 31 December 2015. Public and private hospital admission records were drawn from the NSW Admitted Patient Data Collection (‘hospital data’)



1  
2  
3 for admissions from 1 September 2009 to 31 December 2014. An additional 4 months of hospital data  
4 were retrieved prior to the start of the study period to allow for admissions to hospital for births early in  
5 2010. Diagnoses coded in the hospital data are applied according to the International Classification of  
6 Diseases, Australian Modification (ICD-10-AM). Records within and across all datasets were  
7 probabilistically linked using personal identifiers by the NSW Centre for Health Record Linkage with an  
8 estimated false linkage rate of less than 5 per 1,000 records.(15) Hospital birth records were those  
9 where the birth was recorded to have occurred between the mother's admission and discharge dates  
10 using the linked birth data. It's estimated that 96% of records from the birth data link to the mother's  
11 and infant's hospital records from the birth.(16)

12  
13  
14  
15  
16 Aboriginal women were defined as those who were recorded as Australian Aboriginal in the birth data  
17 or who were assigned Aboriginal status according to the Enhanced Reporting of Aboriginality (ERA)  
18 algorithm.

### 19 20 21 **Enhanced Reporting of Aboriginality (ERA)**

22 It is widely acknowledged that Aboriginal status is under-recorded on routinely collected health datasets  
23 nationwide.(17) Enhancement of reporting of Aboriginal people using linked records creates a  
24 statistical construct that results in improved information about Aboriginal people. It does not define a  
25 person as being Aboriginal, nor does it replace efforts to improve the overall quality of recording  
26 Aboriginal status at the point of care.

27  
28  
29 Information surrounding individuals' Aboriginal status was pooled via linkage of the birth data, NSW  
30 Registry of Births, Deaths and Marriages birth registrations, hospital data and the NSW Emergency  
31 Department Data Collection. Using this information, a weight of evidence surrounding a woman's  
32 Aboriginal status was determined by a multistage median algorithm.(18) Since multiple datasets were  
33 used and some women had multiple records in each of these datasets, the algorithm initially assigned a  
34 separate status for each woman and dataset. Aboriginal or Torres Strait Islander status was assigned to  
35 a mother if: one or two linked records were available and at least one reported her as Aboriginal; three  
36 or more linked records were available and at least two reported her as Aboriginal. A comparable  
37 algorithm using dataset-specific statuses instead of records was used to determine the inclusion of each  
38 woman in the study population.

39  
40  
41  
42  
43 The enhanced reporting of Aboriginality is a technique used by many research groups.(19-21) Although  
44 this combination of datasets and algorithm has not been used before, similar methods have been found  
45 to minimise the risk of incorrect inclusion while capturing more women than simply relying on a single  
46 record.(22) Details on the algorithm, the data used and the mothers identified through the ERA have  
47 been described in more detail elsewhere.(23)

### 48 49 50 **Exposure**

51 The exposure of interest for this study was not smoking at any time during pregnancy. Mothers who  
52 reported not smoking during pregnancy will henceforth be referred to as non-smokers and those who  
53 reported any smoking during pregnancy are referred to as smokers. To increase ascertainment, birth  
54 data and mother's hospital birth record(s) were used to assign smoking status. If the birth data indicated  
55 that a mother smoked at any time during her pregnancy and/or recorded her as a current smoker within  
56  
57

1  
2  
3 the hospital birth record(s) (according to the ICD-10-AM diagnosis codes Z72.0 and F17) then she was  
4 considered to be a smoker. The sensitivity and specificity of current smoking from the most recent  
5 separation in the hospital data is estimated to be 58.5% and 98.4% respectively.(24) Where a mother  
6 had multiple hospital records associated with the birth and those records contradicted each other  
7 according to smoking status, her smoking status defaulted to that recorded in the birth data.  
8  
9

### 10 Outcomes

11 Maternal outcomes were identified using the birth data and the mother's hospital birth record and  
12 included two binary outcomes: severe maternal morbidity and inter-hospital transfer. Severe maternal  
13 morbidity was defined using a validated composite indicator that captures a broad range of diagnoses  
14 and procedures such as cardiac arrest, renal failure or assisted ventilation.(25) Mothers requiring inter-  
15 hospital transfer were defined as those with at least one record with a mode of separation indicating  
16 transfer or where multiple hospitalisation records were present with differing hospital codes.  
17  
18

19 Perinatal outcomes, including birth outcomes and those occurring within the first 28 days of life for the  
20 baby were retrieved from the birth data and the baby's linked hospital and birth registration records.  
21 These included perinatal death (stillbirth and neonatal death), preterm birth (<37 completed weeks of  
22 gestation), and small for gestational age (birth weight <3<sup>rd</sup> and/or 10<sup>th</sup> percentile for sex and age (26)).  
23 Admissions to a special care nursery (SCN) or neonatal intensive care unit (NICU) were assessed among  
24 an eligible population of babies born in a hospital classified as level 3 or above (NSW Ministry of Health's  
25 *Guide to the Role Delineation of Hospitals*) or a private hospital. Severe neonatal morbidity, measured  
26 according to a validated composite indicator (27), was assessed among all live births.  
27  
28  
29  
30

### 31 Covariates

32 Maternal age and parity were reported according to the birth data. The mother's chronic conditions,  
33 hypertension and diabetes information were obtained from the birth data and the hospital birth  
34 record(s). We used the broad category of any hypertension rather than the specific categories of chronic  
35 hypertension, pregnancy hypertension, preeclampsia and eclampsia, as there is known misclassification  
36 among types of hypertension (28). The NSW ranking of the Australian Bureau of Statistics (ABS) 2011  
37 Socio-Economic Index for Areas (SEIFA) Index of Relative Socio-Economic Disadvantage (IRSD) and the  
38 2011 Remoteness Areas were used to assess the mother's relative socio-economic status and access to  
39 services respectively. Where available, the mother's 2011 Statistical Local Area (SLA) according to her  
40 birth data was used to assign these measures. Otherwise, and for all babies born in 2010, the mother's  
41 2010 SLA was used. Hospital type is an indicator of the size of a hospital and its location (urban or  
42 regional)(29) and was assigned using the hospital code recorded in the birth data.  
43  
44  
45  
46  
47

### 48 Statistical analyses

49 The study population was described using frequencies and percentages by potential confounders and  
50 the mother's smoking status. Summary statistics were calculated by mother's smoking status to  
51 investigate the associations between smoking during pregnancy and maternal and child outcomes. To  
52 estimate the unadjusted and adjusted relative risk (RR) of binary outcomes while accounting for the  
53 correlation within the data (some mothers had more than one baby during the study period), an  
54 extension to the modified Poisson regression (30) was used with an unstructured correlation matrix.  
55 Those observations where data were missing for an outcome were excluded from analysis for that  
56  
57  
58  
59  
60

1  
2  
3 outcome. SAS for Windows 9.4 (SAS Institute, Cary, NC, USA) was used for all data manipulation and  
4 analysis.  
5

6  
7 In view of the established causal relationship between smoking and adverse perinatal outcomes, we  
8 quantified the proportion and number of adverse perinatal outcomes that would not have occurred in  
9 this population if all the mothers had been non-smokers during pregnancy. We used the formula:  $PAF = [P_s(RR_s - 1)] / RR_s$ , where  $P_s$  is the proportion of babies with the outcome whose mothers smoked and  $RR_s$   
10 is the adjusted RR for smokers. The  $RR_s$  is the inverse of the RR for non-smokers.  
11  
12

### 13 **Patient and public involvement**

14 An Aboriginal advisory committee was consulted prior to submission of the study proposal to ethics  
15 committees and throughout the process. The committee provided guidance on presentation and  
16 interpretation of results. It was of particular importance to members of the committee that the results  
17 were framed positively, ie the *benefits* of not smoking, rather than the risks of smoking. It was also  
18 important to committee members that all comparisons were among Aboriginal women and that  
19 Aboriginal women were not compared with non-Aboriginal women. There are plans to develop  
20 culturally appropriate educational material based on the results of this research and in collaboration  
21 with Aboriginal Health Workers and others involved in the care of Aboriginal women who are pregnant  
22 or may be planning a pregnancy.  
23  
24  
25  
26

### 27 **Results**

28  
29 Following exclusion of duplicates (n=76), a total of 487,388 babies were born to 379,116 mothers in  
30 NSW and were assessed for inclusion in this study. Records for 16,904 babies born to 12,720 mothers  
31 who were recorded as Aboriginal in the birth data were available for analysis. An additional 1,921 babies  
32 born to 1,624 mothers were identified as eligible for inclusion in the study using the ERA. Of the total  
33 18,825 babies, 557 were from a multiple birth and 114 were born to mothers who were not residents of  
34 NSW. These babies did not meet the eligibility criteria and were excluded. Thus the final study  
35 population consisted of 18,154 singleton babies born to 13,477 Aboriginal mothers. Figure 1 outlines the  
36 flow of participants in this study.  
37  
38  
39  
40

41 Among the study population, 9,235 (51%) babies were born to non-smoking mothers and 8,919 (49%)  
42 were born to smoking mothers (Table 1). Only two percent of all linked records had contradictory  
43 smoking statuses from the birth and hospital data. For comparison, when smoking status was assigned  
44 only according to the birth data, 52% of babies were born to non-smoking mothers and 48% were born  
45 to smoking mothers. Mothers who reported not smoking at any time during their pregnancy were  
46 generally less disadvantaged than their smoking counterparts; approximately 8.1% of non-smoking  
47 mothers were in the highest SEIFA quintile, compared to just 4.1% of smoking mothers. Non-smoking  
48 mothers were older, lived in less remote regions and had fewer previous pregnancies than smoking  
49 mothers. The number of non-smoking mothers with hypertension (1,106) was almost double that of  
50 smoking mothers (578) and slightly more non-smoking mothers had diabetes (Table 1).  
51  
52  
53  
54

55 The majority (70%) of mothers only had one baby during the study period however a substantial number  
56 had multiple: 25% had two, 4.4% had three and 0.4% had four. For 564 (4%) mothers, their smoking  
57  
58

1  
2  
3 status changed between pregnancies, 6,814 (53%) mothers reported not smoking in all pregnancies  
4 during the study period and 6,099 (47%) consistently reported smoking. Of the 564 mothers whose  
5 smoking status changed between pregnancies, 266 (47%) changed from smoking to non-smoking, 271  
6 (48%) changed from non-smoking to smoking in all subsequent pregnancies and 27 (5%) moved  
7 between smoker and non-smoker status.  
8  
9

10 The rate of severe maternal morbidity was low (<3%) and not significantly different between smoking  
11 and non-smoking mothers (Table 2). The rate of inter-hospital transfer was lower in the non-smoking  
12 group at 3.7% compared with the smoking group (5.1%), with an adjusted relative risk of RR=0.76 (95%  
13 CI 0.66, 0.89).  
14  
15

16 Adverse perinatal outcomes occurred less frequently among babies born to non-smoking mothers (Table  
17 3). Perinatal deaths were rare in both populations however the rate was lower in the non-smoking  
18 group with perinatal death occurring in 1.0% of babies born to non-smoking mothers, compared to 1.8%  
19 in smoking mothers. Also, severe neonatal morbidity and admission to SCN or NICU was less frequent in  
20 babies born to non-smoking mothers when compared to those born to smoking mothers. Overall, the  
21 gestational age of babies from the non-smoking group was closer to term than those from the smoking  
22 group; more babies born to non-smoking mothers (66%) were born between 39 and 41 weeks than  
23 those born to smoking mothers (55%). Preterm birth was considerably less frequent among babies born  
24 to mothers who did not smoke during pregnancy; 8.2% of births to non-smoking mothers were preterm  
25 compared to 14% from smoking mothers. Similarly, babies born to non-smoking mothers were less often  
26 small for gestational age, with 2.0% and 7.0% of these babies having a birthweight below the 3rd and  
27 10th percentiles respectively compared to 7.3% and 20% of babies of smoking mothers. All relative risks  
28 were less than 1, suggesting a reduced risk of all adverse outcomes among babies born to non-smoking  
29 mothers when compared to those born to smoking mothers. Of note were the relative risks for perinatal  
30 death (RR=0.58 95% CI 0.44, 0.76), preterm birth (RR=0.58 95% CI 0.53, 0.64) and small for gestational  
31 age (<10<sup>th</sup> percentile; RR=0.35 95% CI 0.32, 0.39). As indicated by the PAFs (%) in Table 3, more than a  
32 quarter of the perinatal deaths and preterm births were attributable to smoking and almost half the  
33 small for gestational age births. Among this cohort of babies, this equates to 68 perinatal deaths, 540  
34 preterm births and 1,131 small for gestational age (<10<sup>th</sup> percentile) babies attributable to smoking.  
35  
36  
37  
38  
39  
40  
41  
42

## 43 Discussion

44 This study of a recent population of pregnant Aboriginal women clearly demonstrates improved  
45 pregnancy outcomes among Aboriginal mothers who reported not smoking during pregnancy when  
46 compared to Aboriginal mothers who reported smoking during pregnancy. Benefits of not smoking were  
47 found for all the perinatal outcomes we examined. We also found non-smoking mothers had a 24%  
48 lower risk of being transferred to another hospital during the birth admission than smoking mothers of  
49 similar demographics. Inter-hospital transfers may be due to complications arising before, during or  
50 after the birth. This means women are less likely to be away from their family and country during this  
51 challenging time. Although a slightly lower risk of severe maternal morbidity was found in the non-  
52 smoking group, there was not sufficient evidence to suggest a true difference existed as the confidence  
53  
54  
55  
56  
57  
58  
59  
60

1  
2  
3 interval included 1 (RR=0.92, 95% CI 0.77–1.11). Other risk factors may be more strongly associated with  
4 severe maternal morbidity than smoking.  
5

6  
7 Among babies born to mothers of a similar age, with similar pre-existing conditions (any diabetes or  
8 hypertension), parity and socio-economic status, those with a non-smoking mother had a 42% less risk  
9 of perinatal death and preterm birth, 65% less risk of being small-for-gestational age (<10<sup>th</sup> percentile),  
10 30% less risk of severe neonatal morbidity, and 33% less risk of being admitted to a SCN or NICU than  
11 those born to a mother who smoked at any time during her pregnancy. The reductions in adverse  
12 outcomes for babies born to non-smoking mothers were statistically and clinically significant and  
13 remained so even after adjustment. Encouragingly, despite some rates being marginally higher, overall  
14 very little difference exists between the rates of adverse perinatal outcomes among the non-smoking  
15 Aboriginal mothers in this study and the overall NSW population of mothers giving birth in 2014, of  
16 whom 9.3% reported smoking and 3.9% were recorded as Aboriginal.(14) The high PAFs for the adverse  
17 perinatal outcomes highlight the enormous potential for health improvements in this population. Over a  
18 quarter of the perinatal deaths and preterm births were attributable to smoking. Being born small for  
19 gestational age is associated with short and long-term health sequelae, and these risks are even greater  
20 for babies born with a birthweight less than the third percentile for gestational age and sex. The PAF(%)  
21 was highest (57%) for being born with a birthweight less than the third percentile. Almost half (48%) the  
22 babies born small for gestational age (<10<sup>th</sup> percentile) could have had a normal birthweight (≥10<sup>th</sup>  
23 percentile) in the absence of smoking. Our results are consistent with a recent study of a cohort of  
24 697,003 children born in Scotland from 1997–2009 (31). In addition to the adverse perinatal outcomes  
25 attributable to smoking, this study followed children until five years of age and found that maternal  
26 smoking during pregnancy also increased the risk of the child being hospitalized with acute respiratory  
27 infections, bronchiolitis, asthma and bacterial meningitis (31).  
28  
29  
30  
31  
32  
33

34 As expected, and similar to findings from other studies, (31, 32) mothers from the non-smoking group  
35 were less disadvantaged, older, resided in less remote regions and had fewer previous pregnancies than  
36 those from the smoking group. Diabetes and hypertension were more prevalent among non-smoking  
37 mothers than smoking mothers. The small difference in prevalence of diabetes (8.7% vs 6.5%) could be  
38 due to the non-smoking group being slightly older than the smoking group. However the prevalence of  
39 hypertension in non-smoking mothers was almost double that of smoking mothers (12% vs 6.5%). Whilst  
40 this finding may surprise some, it is consistent with findings from previous studies (33–36). A systematic  
41 review of 48 studies concluded that smoking during pregnancy reduces the risk of preeclampsia by up to  
42 50% and that there is a dose-response relationship (34). Similar results have been reported when the  
43 outcome includes gestational hypertension as well as preeclampsia, and the protective effect appears to  
44 continue even after women quit smoking later in pregnancy (36). This protective effect may be  
45 mediated via the biological effects of carbon monoxide that is formed during smoking (35). However,  
46 when preeclampsia does occur, the outcomes are much worse for babies whose mothers smoked (33).  
47 Although preeclampsia is associated with adverse pregnancy outcomes, and smoking reduces the  
48 incidence of preeclampsia, the net effect of smoking is still a worsening of pregnancy outcomes and  
49 there are dose-dependent increases in perinatal deaths and SGA babies among mothers who smoke  
50 (33). Hence these findings in no way indicate any benefit to mothers or babies if the mother smokes  
51 during pregnancy.  
52  
53  
54  
55  
56  
57

1  
2  
3 As well as being a national health priority in Australia, reducing smoking during pregnancy is a key  
4 performance indicator in the annual service agreements between the NSW Ministry of Health and Local  
5 Health Districts.(37) As part of this commitment, the Quit for New Life program was established in 2013  
6 with the aim to support women having an Aboriginal baby to quit smoking. The program was integrated  
7 into Aboriginal Maternal and Infant Health Services and has supported over 2,500 pregnant women, 950  
8 postnatal women and 1,650 cohabitants in their quit attempt.(38) However, further efforts including  
9 health professional training, expansion to other maternal health services and community programs, and  
10 improved data collection and reporting are required to reduce the prevalence of smoking in pregnancy  
11 in this population. Investment to discourage women, especially young women, from taking up smoking  
12 and encouraging and appropriately supporting smokers to quit need to remain priorities.  
13  
14  
15

16  
17 Health professionals have a critical role in communicating the benefits of not smoking during pregnancy  
18 found in this study. However some practitioners perceive intervention to be ineffective and thus may  
19 not raise this issue with their patients.(39) The highly relevant evidence from this study may increase the  
20 salience of the issue and provide further motivation for health professionals to consistently ask and  
21 advise about smoking.  
22  
23

24 While the health impacts of smoking on maternal and child health are well known (9-13), this study  
25 provides local information that can be used to further engage Australian health professionals and  
26 community members on the benefits of not smoking. Building on the strength and resilience of  
27 Aboriginal people is an important foundation for efforts to reduce smoking among this population.(40)  
28 Using local evidence on the *benefits* of not smoking during pregnancy has the potential to re-frame  
29 health messages for women, their families and communities and to mobilise community action to  
30 achieve better health outcomes.  
31  
32  
33

### 34 **Strengths and limitations**

35 This is the first study we are aware of that examines associations between smoking in pregnancy and  
36 adverse pregnancy outcomes exclusively among Aboriginal and/or Torres Strait Islander women. This  
37 was a large population-based study. Using data linkage, we were able to capture more women through  
38 the ERA, further increasing our sample size. Despite the unavailability of information surrounding some  
39 potential confounders, including individual level socioeconomic status, our findings were consistent with  
40 those among other populations from the literature (9-13). Limited data on the heaviness of smoking  
41 during pregnancy meant that potential dose effects could not be calculated. However, new data around  
42 quitting in pregnancy is available from 2016 onward so there is potential for future work to examine this  
43 phenomenon further. Similarly, no information was available on the mother's history of smoking,  
44 exposure to environmental tobacco smoke or alcohol consumption and so effects from longer term  
45 smoking and potential confounding from alcohol consumption could not be accounted for. A lack of data  
46 surrounding history and heaviness of smoking means that the treatment effects estimated in this study  
47 are likely to be biased toward the null and thus underestimate the true benefits of not smoking in  
48 pregnancy. Under-ascertainment of smoking status would similarly bias toward the null. Mothers who  
49 smoked in one pregnancy but not in a subsequent pregnancy were classified as non-smokers in the  
50 subsequent pregnancy. If these mothers were more likely to have worse outcomes in the subsequent  
51  
52  
53  
54  
55  
56  
57  
58  
59  
60

pregnancy compared with never smoking mothers, this would also bias towards the null. However, any effect would be negligible due to the very low numbers (<2% of the study population).

## Conclusions

Babies born to Aboriginal mothers who did not smoke during pregnancy were at a significantly reduced risk of adverse perinatal outcomes compared to those born to smoking mothers of similar demographics. Rates of these adverse outcomes among Aboriginal women who did not smoke were very similar to those among the general NSW population.

These results reinforce the importance of targeted smoking cessation policy for Aboriginal women. Barriers to smoking cessation in this population are complex and it is vital that this evidence is provided concurrently with sufficient support to enable Aboriginal women to quit smoking. Distributing this information in isolation runs the risk of furthering shame and stress experienced by pregnant women and may discourage them from seeking further help, highlighting the importance of systematic approaches to encourage and support Aboriginal women to quit smoking.

## Acknowledgements

The authors would like to thank the members of the Aboriginal Advisory Committee who provided valuable advice, the NSW Ministry of Health for providing access to the datasets used and the Centre for Health Record Linkage for linking these datasets.

## Footnotes

### Copyright

The Corresponding Author has the right to grant on behalf of all authors and does grant on behalf of all authors, a worldwide licence to the Publishers and its licensees in perpetuity, in all forms, formats and media (whether known now or created in the future), to i) publish, reproduce, distribute, display and store the Contribution, ii) translate the Contribution into other languages, create adaptations, reprints, include within collections and create summaries, extracts and/or, abstracts of the Contribution, iii) create any other derivative work(s) based on the Contribution, iv) to exploit all subsidiary rights in the Contribution, v) the inclusion of electronic links from the Contribution to third party material wherever it may be located; and, vi) licence any third party to do any or all of the above.

### Contributors

JMitchell and AM had the initial idea for this study. ST wrote the study proposal and was responsible for the ethics application and revisions to the manuscript. CM undertook all analyses, with guidance from ST, II and DR, and drafted the manuscript. JF, JMorris, JMitchell, AM and ST all contributed to the design of the study and, with DM, the interpretation of the results. All authors commented on drafts and read and approved the final manuscript. The corresponding author attests that all listed authors meet authorship criteria and that no others meeting the criteria have been omitted. CM and ST are guarantors.

### Statement of Conflicts of Interest

All authors have completed the ICMJE uniform disclosure form at [www.icmje.org/coi\\_disclosure.pdf](http://www.icmje.org/coi_disclosure.pdf) and declare: CM and ST's salaries came from a Prevention Research Support Program grant from the NSW Ministry of Health, no other relationships or activities that could appear to have influenced the submitted work.

### Funding Statement

This work was supported by a NSW Ministry of Health Prevention Research Support Program grant. This work was completed while Carol McInerney was employed as a trainee on the NSW Biostatistics Training Program funded by the NSW Ministry of Health. She undertook this work whilst based at the Women and Babies Research, Kolling Institute, Northern Sydney Local Health District. Carol McInerney and Siranda Torvaldsen are supported by the NSW Ministry of Health Prevention Research Support Program grant. The funder had no role in the study design, analysis or interpretation of the data or in the writing of the report. However, the NSW Ministry of Health requires all Biostatistics Trainees to seek their approval before submitting a manuscript for publication.

### Ethics approval

Ethics approval for this study was given by the Aboriginal Health and Medical Research Council of New South Wales, Australia (HREC reference number: 1326/17) and was exempt from informed consent requirements as there was no contact with the study population and the authors only had access to de-identified data.

### Transparency statement

The lead author affirms that the manuscript is an honest, accurate, and transparent account of the study being reported; that no important aspects of the study have been omitted; and that any discrepancies from the study as planned have been explained.

### Data sharing

No additional data are available.



## References

1. Department of Health. Tobacco Control - key facts and figures 2018 [Available from: <http://www.health.gov.au/internet/publications/publishing.nsf/Content/tobacco-control-toc>.
2. Centre for Epidemiology and Evidence. NSW Mothers and Babies 2016. Sydney: NSW Ministry of Health. 2017.
3. Gould GS, Cadet-James Y, Clough AR. Getting over the shock: taking action on Indigenous maternal smoking. *Aust J Prim Health*. 2016;22(4):276-82.
4. NSW Ministry of Health. Snapshot of Tobacco Strategy 2012-2017. 2017.
5. Australian Bureau of Statistics. Estimates of Aboriginal and Torres Strait Islander Australians, June 2011. 2013 [Available from: <http://www.abs.gov.au/ausstats/abs@.nsf/mf/3238.0.55.001>.
6. NSW Department of Health. Communicating positively - A guide to appropriate Aboriginal terminology. Sydney, Australia: NSW Department of Health 2004.
7. Carson KV, Brinn MP, Peters M, Veale A, Esterman AJ, Smith BJ. Interventions for smoking cessation in Indigenous populations. *Cochrane database of systematic reviews (Online)*. 2012;1.
8. Passey ME, Sanson-Fisher RW, Stirling JM. Supporting Pregnant Aboriginal and Torres Strait Islander Women to Quit Smoking: Views of Antenatal Care Providers and Pregnant Indigenous Women. *Matern Child Health J*. 2014;18(10):2293-9.
9. Cnattingius S. The epidemiology of smoking during pregnancy: smoking prevalence, maternal characteristics, and pregnancy outcomes. *Nicotine & tobacco research : official journal of the Society for Research on Nicotine and Tobacco*. 2004;6 Suppl 2:S125-40.
10. Marufu TC, Ahankari A, Coleman T, Lewis S. Maternal smoking and the risk of still birth: systematic review and meta-analysis. *BMC public health*. 2015;15:239.
11. Mendelsohn C, Gould GS, Oncken C. Management of smoking in pregnant women. *Australian family physician*. 2014;43(1):46-51.
12. Salihi HM, Wilson RE. Epidemiology of prenatal smoking and perinatal outcomes. *Early Hum Dev*. 2007;83(11):713-20.
13. US Department of Health and Human Services. The Health Consequences of Smoking—50 Years of Progress: A Report of the Surgeon General. . In: US Department of Health and Human Services CfDCaP, National Center for Chronic Disease Prevention and Health Promotion, Office on Smoking and Health, editor. Atlanta, GA2014.
14. Centre for Epidemiology and Evidence. NSW Mothers and Babies 2014. Sydney, Australia: NSW Ministry of Health; 2016.
15. Centre for Health Record Linkage [Internet]. Quality Assurance 2018 [Available from: <http://www.cherel.org.au/quality-assurance>.
16. Bentley JP, Ford JB, Taylor LK, Irvine KA, Roberts CL. Investigating linkage rates among probabilistically linked birth and hospitalization records. *BMC Medical Research Methodology*. 2012;12.
17. Australian Institute of Health and Welfare and Australian Bureau of Statistics. National best practice guidelines for data linkage activities relating to Aboriginal and Torres Strait Islander people. Canberra, Australia: AIHW; 2012. Contract No.: Cat. No. IHW 74.
18. Christensen D, Davis G, Draper G, Mitrou F, McKeown S, Lawrence D, et al. Evidence for the use of an algorithm in resolving inconsistent and missing Indigenous status in administrative data collections. *Austr J Soc Iss*. 2014;49(4):423-43.
19. Population and Public Health Division. Improved reporting of Aboriginal and Torres Strait Islander peoples on population datasets in New South Wales using record linkage—a feasibility study. Sydney, Australia: NSW Ministry of Health; 2012.

20. Xu F, Sullivan EA, Madden RC, Black D, Pulver LR. Improvement of maternal Aboriginality in NSW birth data. *BMC Med Res Methodol*. 2012;12:8.
21. Taylor LK, Bentley J, Hunt J, Madden R, McKeown S, Brandt P, Baker D. Enhanced reporting of deaths among Aboriginal and Torres Strait Islander peoples using linked administrative health datasets. *BMC Medical Research Methodology*. 2012;12(1).
22. Gibberd AJ, Simpson JM, Eades SJ. Use of family relationships improved consistency of identification of Aboriginal people in linked administrative data. *J Clin Epidemiol*. 2017;90:144-55.
23. McInerney C, Ibiebele I, Torvaldsen S, Ford JB, Morris JM, Nelson M, Randall DA. Defining a study population using enhanced reporting of Aboriginality and the effects on study outcomes. *International Journal of Population Data Science*. 2019;In press.
24. Havard A, Jorm LR, Lujic S. Risk adjustment for smoking identified through tobacco use diagnoses in hospital data: A validation study. *PLoS ONE*. 2014;9(4).
25. Roberts CL, Cameron CA, Bell JC, Algert CS, Morris JM. Measuring maternal morbidity in routinely collected health data: Development and validation of a maternal morbidity outcome indicator. *Med Care*. 2008;46(8):786-94.
26. Dobbins TA, Sullivan EA, Roberts CL, Simpson JM. Australian national birthweight percentiles by sex and gestational age, 1998-2007. *Med J Aust*. 2012;197(5):291-4.
27. Lain SJ, Algert CS, Nassar N, Bowen JR, Roberts CL. Incidence of severe adverse neonatal outcomes: Use of a composite indicator in a population cohort. *Matern Child Health J*. 2012;16(3):600-8.
28. Roberts CL, Bell JC, Ford JB, Hadfield RM, Algert CS, Morris JM. The accuracy of reporting of the hypertensive disorders of pregnancy in population health data. *Hypertension in Pregnancy*. 2008;27(3):285-97.
29. Falster MO, Roberts CL, Ford J, Morris J, Kinnear A, Nicholl M. Development of a maternity hospital classification for use in perinatal research. *NSW Public Health Bulletin*. 2012;23(1-2):12-6.
30. Zou GY, Donner A. Extension of the modified Poisson regression model to prospective studies with correlated binary data. *Stat Methods Med Res*. 2013;22(6):661-70.
31. Lawder R, Whyte B, Wood R, Fischbacher C, Tappin D. Impact of maternal smoking on early childhood health: a retrospective cohort linked dataset analysis of 697 003 children born in Scotland 1997–2009. *BMJ Open*. 2019;9(0:e023213).
32. Cnattingius S. The epidemiology of smoking during pregnancy: Smoking prevalence, maternal characteristics, and pregnancy outcomes. *Nicotine & Tobacco Research*. 2004;6:125-40.
33. Cnattingius S, Mills JL, Yuen J, Eriksson O, Salonen H. The paradoxical effect of smoking in preeclamptic pregnancies: smoking reduces the incidence but increases the rates of perinatal mortality, abruptio placentae, and intrauterine growth restriction. *American Journal of Obstetrics & Gynecology*. 1997;177(1):156-61.
34. England L, Zhang J. Smoking and risk of preeclampsia: a systematic review. *Frontiers in Bioscience*. 2007;12:2471-83.
35. Karumanchi SA, Levine RJ. How does smoking reduce the risk of preeclampsia? *Hypertension*. 2010;55(5):1100-1.
36. Zhang J, Klebanoff MA, Levine RJ, Puri M, Moyer P. The puzzling association between smoking and hypertension during pregnancy. *American Journal of Obstetrics & Gynecology*. 1999;181(6):1407-13.
37. New South Wales Health. NSW Health Service Agreement 2017 [Available from: <https://www.health.nsw.gov.au/Performance/Documents/service-agreement-generic.pdf>].
38. Centre for Population Health. Quit for New Life: New South Wales Health,; 2018 [Available from: <https://www.health.nsw.gov.au/tobacco/Pages/quit-for-new-life.aspx>].

- 1  
2  
3 39. The Royal Australian College of General Practitioners. Supporting Smoking Cessation 2014  
4 [Available from: [https://www.racgp.org.au/your-practice/guidelines/smoking-cessation/the-role-of-](https://www.racgp.org.au/your-practice/guidelines/smoking-cessation/the-role-of-health-professionals/)  
5 [health-professionals/](https://www.racgp.org.au/your-practice/guidelines/smoking-cessation/the-role-of-health-professionals/).  
6  
7 40. Aboriginal Health & Medical Research Council of NSW and NSW Ministry of Health. The ATRAC  
8 Framework: A strategic framework for Aboriginal tobacco resistance and control in NSW. Sydney,  
9 Australia. 2014.  
10 41. Chen JS, Roberts CL, Simpson JM, Ford JB. Use of hospitalisation history (lookback) to determine  
11 prevalence of chronic diseases: Impact on modelling of risk factors for haemorrhage in pregnancy. BMC  
12 Medical Research Methodology. 2011;11.  
13  
14  
15  
16  
17  
18  
19  
20  
21  
22  
23  
24  
25  
26  
27  
28  
29  
30  
31  
32  
33  
34  
35  
36  
37  
38  
39  
40  
41  
42  
43  
44  
45  
46  
47  
48  
49  
50  
51  
52  
53  
54  
55  
56  
57  
58  
59  
60

For peer review only

Figure caption:

Figure 1 Flow diagram of mothers and babies eligible for inclusion in the final study population.

Table 1 Demographics at the time of birth of all Aboriginal or Torres Strait Islander mothers who gave birth to at least one singleton baby in NSW between 2010 and 2014 reported for all births and by smoking status during pregnancy.

|                               | All births |     | Non-smoking                   |     | Smoking                      |     |
|-------------------------------|------------|-----|-------------------------------|-----|------------------------------|-----|
|                               | N = 18,154 |     | N <sub>ns</sub> = 9,235 (51%) |     | N <sub>s</sub> = 8,919 (49%) |     |
| Year of baby's birth          | n          | %   | n                             | %   | n                            | %   |
| 2010                          | 3,487      | 19  | 1,740                         | 50* | 1,747                        | 50* |
| 2011                          | 3,380      | 19  | 1,638                         | 48* | 1,742                        | 52* |
| 2012                          | 3,680      | 20  | 1,833                         | 50* | 1,847                        | 50* |
| 2013                          | 3,716      | 20  | 1,944                         | 52* | 1,772                        | 48* |
| 2014                          | 3,891      | 21  | 2,080                         | 53* | 1,811                        | 47* |
| <b>Maternal age</b>           |            |     |                               |     |                              |     |
| Under 20                      | 3,214      | 18  | 1,568                         | 17  | 1,646                        | 19  |
| 20–24                         | 6,014      | 33  | 2,983                         | 32  | 3,031                        | 34  |
| 25–29                         | 4,608      | 25  | 2,381                         | 26  | 2,227                        | 25  |
| 30–34                         | 2,729      | 15  | 1,455                         | 16  | 1,274                        | 14  |
| 35 and over                   | 1,589      | 8.8 | 848                           | 9.2 | 741                          | 8.3 |
| Total                         | 18,154     | 100 | 9,235                         | 100 | 8,919                        | 100 |
| <b>Parity</b>                 |            |     |                               |     |                              |     |
| 0                             | 6,259      | 35  | 3,720                         | 40  | 2,539                        | 29  |
| 1                             | 4,709      | 26  | 2,589                         | 28  | 2,120                        | 24  |
| 2                             | 3,107      | 17  | 1,490                         | 16  | 1,617                        | 18  |
| 3+                            | 4,072      | 22  | 1,431                         | 16  | 2,641                        | 30  |
| Total                         | 18,147     | 100 | 9,230                         | 100 | 8,917                        | 100 |
| <b>SEIFA IRSD quintiles**</b> |            |     |                               |     |                              |     |
| 1st – most disadvantaged      | 4,827      | 27  | 2,131                         | 23  | 2,696                        | 30  |
| 2nd                           | 3,674      | 20  | 1,887                         | 21  | 1,787                        | 20  |
| 3rd                           | 5,375      | 30  | 2,806                         | 31  | 2,569                        | 29  |
| 4th                           | 3,068      | 17  | 1,617                         | 18  | 1,451                        | 16  |
| 5th – least disadvantaged     | 1,115      | 6.2 | 748                           | 8.1 | 367                          | 4.1 |
| Total                         | 18,059     | 100 | 9,189                         | 100 | 8,870                        | 100 |
| <b>Remoteness area</b>        |            |     |                               |     |                              |     |
| Major cities                  | 4,193      | 23  | 2,246                         | 24  | 1,947                        | 22  |
| Inner regional                | 6,147      | 34  | 3,310                         | 36  | 2,837                        | 32  |
| Outer regional                | 6,097      | 34  | 2,966                         | 32  | 3,131                        | 35  |
| Remote                        | 1,027      | 5.7 | 421                           | 4.6 | 606                          | 6.8 |
| Very remote                   | 595        | 3.3 | 245                           | 2.7 | 350                          | 4.0 |
| Total                         | 18,059     | 100 | 9,188                         | 100 | 8,871                        | 100 |

| <b>Hospital level</b>                 |        |     |       |     |       |     |
|---------------------------------------|--------|-----|-------|-----|-------|-----|
| Tertiary                              | 4,099  | 23  | 2,108 | 23  | 1,991 | 22  |
| Small and medium urban                | 308    | 1.7 | 178   | 1.8 | 130   | 1.5 |
| Large urban                           | 2,895  | 16  | 1,607 | 9   | 1,288 | 14  |
| Small regional                        | 3,441  | 19  | 1,519 | 16  | 1,922 | 22  |
| Medium regional                       | 3,042  | 17  | 1,550 | 17  | 1,492 | 17  |
| Large regional                        | 3,897  | 21  | 1,896 | 21  | 2,001 | 22  |
| Private                               | 336    | 1.7 | 323   | 3.2 | 13    | 0.2 |
| Other                                 | 136    | 0.7 | 54    | 0.6 | 82    | 0.9 |
| Total                                 | 18,154 | 100 | 9,235 | 100 | 8,919 | 100 |
| <b>Chronic conditions<sup>^</sup></b> |        |     |       |     |       |     |
| Yes                                   | 343    | 1.9 | 147   | 1.6 | 196   | 2.2 |
| Total                                 | 18,154 | 100 | 9,235 | 100 | 8,919 | 100 |
| <b>Any hypertension</b>               |        |     |       |     |       |     |
| Yes                                   | 1,684  | 9.3 | 1,106 | 12  | 578   | 6.5 |
| Total                                 | 18,154 | 100 | 9,235 | 100 | 8,919 | 100 |
| <b>Any diabetes</b>                   |        |     |       |     |       |     |
| Yes                                   | 1,413  | 7.8 | 804   | 8.7 | 609   | 6.5 |
| Total                                 | 18,154 | 100 | 9,235 | 100 | 8,919 | 100 |

\* Percentage of all births within each year.

\*\*Socio-Economic Index for Areas – Index of Relative Socio-Economic Disadvantage (SEIFA IRSD). When ranking areas within NSW in order of their relative disadvantage, the lowest 20% (most disadvantaged) fall in the 1<sup>st</sup> quintile and the highest 20% (least disadvantaged) fall in 5<sup>th</sup> quintile.

<sup>^</sup>Chronic conditions encompasses renal, cardiac, thyroid, asthma, psychiatric, and other autoimmune conditions(41).

Table 2 Frequencies of maternal outcomes at the time of birth of all Aboriginal mothers by smoking status during pregnancy.

|                                  | All births |     | Non-smoking             |     | Smoking                |     | Unadjusted           | Adjusted               |
|----------------------------------|------------|-----|-------------------------|-----|------------------------|-----|----------------------|------------------------|
|                                  | N = 18,154 |     | N <sub>ns</sub> = 9,235 |     | N <sub>s</sub> = 8,919 |     |                      |                        |
|                                  | n          | %   | n                       | %   | n                      | %   | RR (95% CI)          | RR (95% CI)            |
| <b>Severe maternal morbidity</b> |            |     |                         |     |                        |     |                      |                        |
| Yes                              | 523        | 2.9 | 257                     | 2.8 | 266                    | 3.0 | 0.94<br>(0.79, 1.12) | 0.92*<br>(0.77, 1.11)  |
| <b>Inter-hospital transfer</b>   |            |     |                         |     |                        |     |                      |                        |
| Yes                              | 793        | 4.4 | 337                     | 3.7 | 456                    | 5.1 | 0.73<br>(0.63, 0.84) | 0.76**<br>(0.66, 0.89) |

\*adjusted for maternal age, any hypertension, any diabetes, parity and socio-economic status (SEIFA).

\*\* adjusted for maternal age, any hypertension, any diabetes, parity and remoteness area.

Table 3 Frequencies of perinatal outcomes among all babies born to Aboriginal or Torres Strait Islander mothers by maternal smoking status.

|                                                                              | NSW population | All births |     | Non-smoking                        |       | Smoking                |       | Unadjusted           | Adjusted*            | PAF (%) |
|------------------------------------------------------------------------------|----------------|------------|-----|------------------------------------|-------|------------------------|-------|----------------------|----------------------|---------|
|                                                                              |                | N = 18,154 |     | N <sub>ns</sub> = 9,235            |       | N <sub>s</sub> = 8,919 |       |                      |                      |         |
| Preterm birth (<37 wks)                                                      | %              | n          | %   | n                                  | %     | n                      | %     | RR (95% CI)          | RR (95% CI)          |         |
| Yes                                                                          | 8              | 2,045      | 11  | 760                                | 8.2   | 1,285                  | 14    | 0.59<br>(0.54, 0.64) | 0.58<br>(0.53, 0.64) | 26      |
| Total                                                                        |                | 18,154     | 100 | 9,235                              | 100   | 8,919                  | 100   |                      |                      |         |
| <b>Small for gestational age (&lt;3<sup>rd</sup> population percentile)</b>  |                |            |     |                                    |       |                        |       |                      |                      |         |
| Yes                                                                          | 3              | 835        | 4.6 | 183                                | 2.0   | 652                    | 7.3   | 0.28<br>(0.23, 0.32) | 0.27<br>(0.23, 0.32) | 57      |
| Total                                                                        |                | 18,132     | 100 | 9,229                              | 100   | 8,903                  | 100   |                      |                      |         |
| <b>Small for gestational age (&lt;10<sup>th</sup> population percentile)</b> |                |            |     |                                    |       |                        |       |                      |                      |         |
| Yes                                                                          | 10             | 2,381      | 13  | 641                                | 7.0   | 1,740                  | 20    | 0.36<br>(0.33, 0.39) | 0.35<br>(0.32, 0.39) | 48      |
| Total                                                                        |                | 18,132     | 100 | 9,229                              | 100   | 8,903                  | 100   |                      |                      |         |
| <b>Severe neonatal morbidity</b>                                             |                |            |     | <b>Among live births only</b>      |       |                        |       |                      |                      |         |
| Yes                                                                          | 5              | 1,470      | 8.2 | 636                                | 6.9   | 834                    | 9.5   | 0.74<br>(0.67, 0.81) | 0.70<br>(0.63, 0.77) | 17      |
| Total                                                                        |                | 17,978     | 100 | 9,169                              | 100   | 8,809                  | 100   |                      |                      |         |
| <b>Admission to SCN or NICU<sup>^</sup></b>                                  |                |            |     |                                    |       |                        |       |                      |                      |         |
| Yes                                                                          | 15             | 3,957      | 22  | 1,645                              | 18    | 2,312                  | 26    | 0.70<br>(0.66, 0.75) | 0.66<br>(0.63, 0.70) | 20      |
| Total                                                                        |                | 17,809     | 100 | 9,059                              | 100   | 8,750                  | 100   |                      |                      |         |
| <b>Perinatal death</b>                                                       |                |            |     | <b>Rate per 1,000 total births</b> |       |                        |       |                      |                      |         |
| Yes                                                                          | 8              | 254        | 14  | 92                                 | 10**  | 162                    | 18**  | 0.54<br>(0.42, 0.70) | 0.58<br>(0.44, 0.76) | 27      |
| Stillborn                                                                    | 6              | 162        |     | 60                                 | 6.5** | 102                    | 11**  | 0.57<br>(0.41, 0.78) | 0.60<br>(0.43, 0.84) | 20      |
|                                                                              |                |            |     | <b>Rate per 1,000 live births</b>  |       |                        |       |                      |                      |         |
| Neonatal death                                                               | 2              | 92         |     | 32                                 | 3.5^^ | 60                     | 6.8^^ | 0.50                 | 0.54                 | 30      |





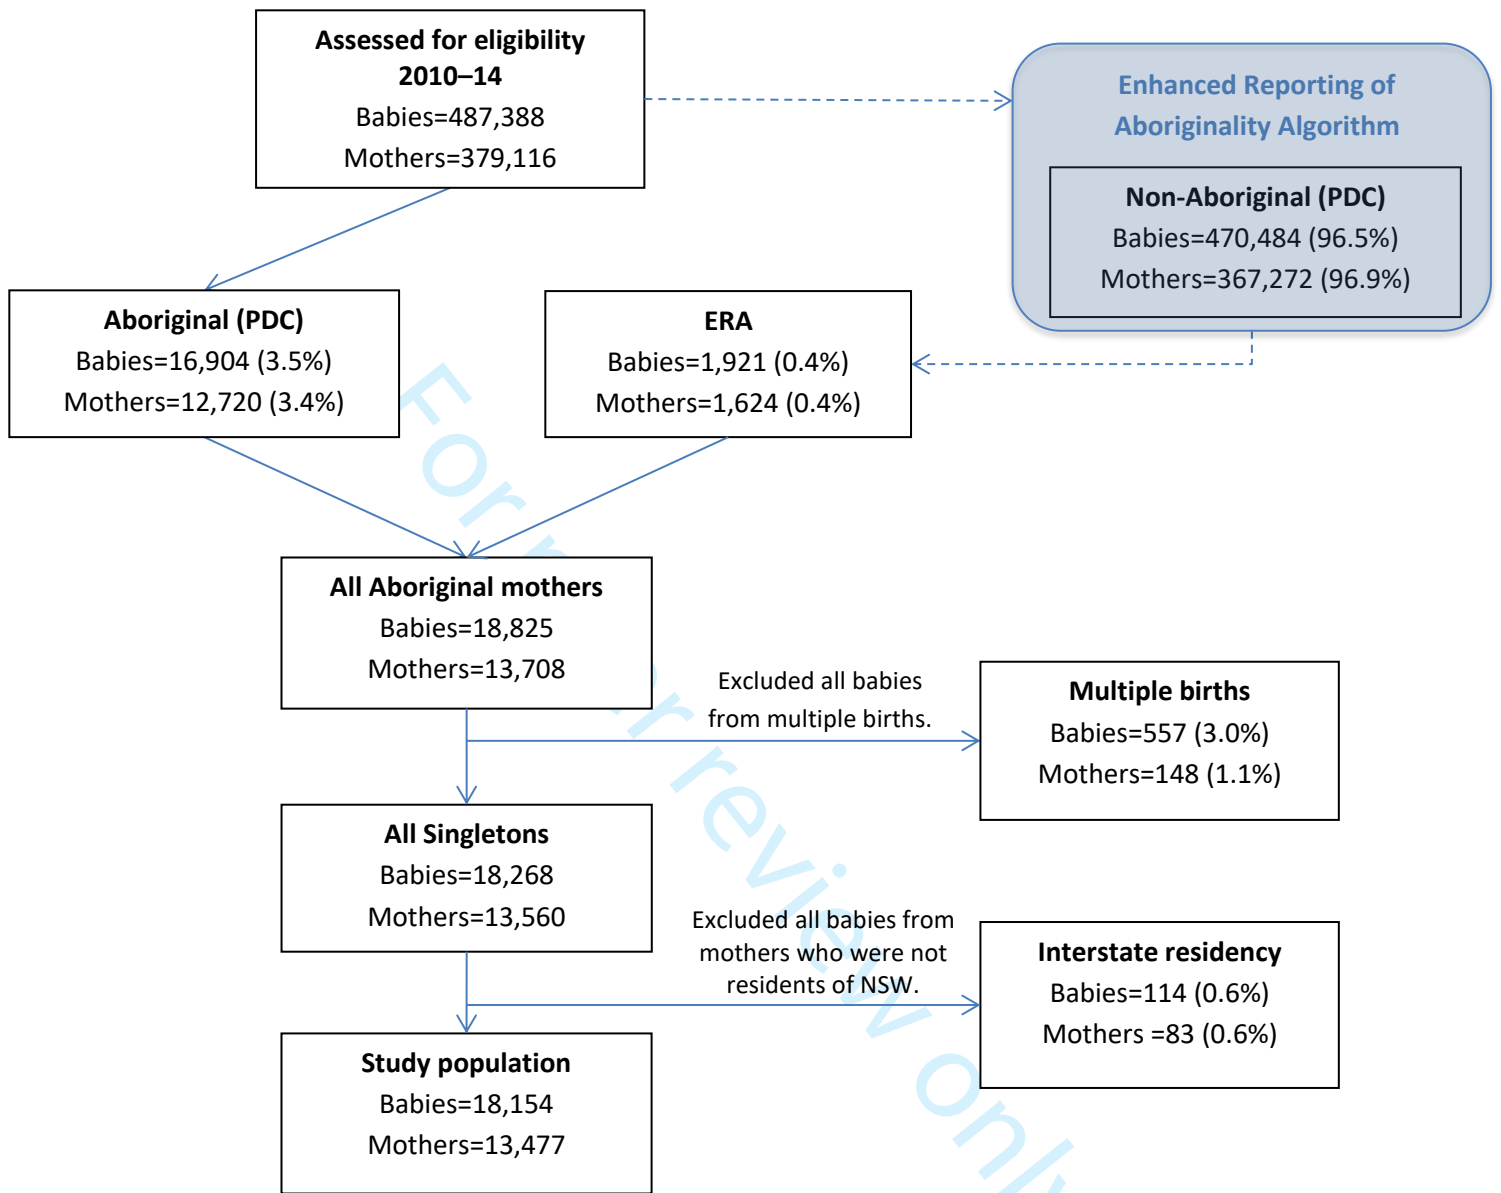

Figure 1 Flow diagram of mothers and babies eligible for inclusion in the final study population.

STROBE Statement—Checklist of items that should be included in reports of *cohort studies*  
**Manuscript for: Benefits of not smoking during pregnancy for Australian Aboriginal and Torres Strait Islander women and their babies: a retrospective cohort study using linked data**

|                           | Item No | Recommendation                                                                                                                                                                                    | Page No     |
|---------------------------|---------|---------------------------------------------------------------------------------------------------------------------------------------------------------------------------------------------------|-------------|
| <b>Title and abstract</b> | 1       | (a) Indicate the study's design with a commonly used term in the title or the abstract                                                                                                            | 1           |
|                           |         | (b) Provide in the abstract an informative and balanced summary of what was done and what was found                                                                                               | 1           |
| <b>Introduction</b>       |         |                                                                                                                                                                                                   |             |
| Background/rationale      | 2       | Explain the scientific background and rationale for the investigation being reported                                                                                                              | 2           |
| Objectives                | 3       | State specific objectives, including any prespecified hypotheses                                                                                                                                  | 2           |
| <b>Methods</b>            |         |                                                                                                                                                                                                   |             |
| Study design              | 4       | Present key elements of study design early in the paper                                                                                                                                           | 2           |
| Setting                   | 5       | Describe the setting, locations, and relevant dates, including periods of recruitment, exposure, follow-up, and data collection                                                                   | 2           |
| Participants              | 6       | (a) Give the eligibility criteria, and the sources and methods of selection of participants. Describe methods of follow-up                                                                        | 2-3         |
|                           |         | (b) For matched studies, give matching criteria and number of exposed and unexposed                                                                                                               | 2-3         |
| Variables                 | 7       | Clearly define all outcomes, exposures, predictors, potential confounders, and effect modifiers. Give diagnostic criteria, if applicable                                                          | 3-4         |
| Data sources/measurement  | 8*      | For each variable of interest, give sources of data and details of methods of assessment (measurement). Describe comparability of assessment methods if there is more than one group              | 3-4         |
| Bias                      | 9       | Describe any efforts to address potential sources of bias                                                                                                                                         | 4           |
| Study size                | 10      | Explain how the study size was arrived at                                                                                                                                                         | 2           |
| Quantitative variables    | 11      | Explain how quantitative variables were handled in the analyses. If applicable, describe which groupings were chosen and why                                                                      | 4           |
| Statistical methods       | 12      | (a) Describe all statistical methods, including those used to control for confounding                                                                                                             | 4-5         |
|                           |         | (b) Describe any methods used to examine subgroups and interactions                                                                                                                               |             |
|                           |         | (c) Explain how missing data were addressed                                                                                                                                                       | 5           |
|                           |         | (d) If applicable, explain how loss to follow-up was addressed                                                                                                                                    |             |
|                           |         | (e) Describe any sensitivity analyses                                                                                                                                                             |             |
| <b>Results</b>            |         |                                                                                                                                                                                                   |             |
| Participants              | 13*     | (a) Report numbers of individuals at each stage of study—eg numbers potentially eligible, examined for eligibility, confirmed eligible, included in the study, completing follow-up, and analysed | Fig 1       |
|                           |         | (b) Give reasons for non-participation at each stage                                                                                                                                              | Fig 1       |
|                           |         | (c) Consider use of a flow diagram                                                                                                                                                                | Fig 1       |
| Descriptive data          | 14*     | (a) Give characteristics of study participants (eg demographic, clinical, social) and information on exposures and potential confounders                                                          | Table 1     |
|                           |         | (b) Indicate number of participants with missing data for each variable of interest                                                                                                               | Table 1,2,3 |
|                           |         | (c) Summarise follow-up time (eg, average and total amount)                                                                                                                                       |             |
| Outcome data              | 15*     | Report numbers of outcome events or summary measures over time                                                                                                                                    | Table       |

2,3

|    |                          |    |                                                                                                                                                                                                              |
|----|--------------------------|----|--------------------------------------------------------------------------------------------------------------------------------------------------------------------------------------------------------------|
| 1  |                          |    | 2,3                                                                                                                                                                                                          |
| 2  |                          |    |                                                                                                                                                                                                              |
| 3  | Main results             | 16 | (a) Give unadjusted estimates and, if applicable, confounder-adjusted estimates and their precision (eg, 95% confidence interval). Make clear which confounders were adjusted for and why they were included |
| 4  |                          |    | Table                                                                                                                                                                                                        |
| 5  |                          |    | 2,3                                                                                                                                                                                                          |
| 6  |                          |    |                                                                                                                                                                                                              |
| 7  |                          |    |                                                                                                                                                                                                              |
| 8  |                          |    |                                                                                                                                                                                                              |
| 9  |                          |    |                                                                                                                                                                                                              |
| 10 |                          |    |                                                                                                                                                                                                              |
| 11 | Other analyses           | 17 | Report other analyses done—eg analyses of subgroups and interactions, and sensitivity analyses                                                                                                               |
| 12 |                          |    |                                                                                                                                                                                                              |
| 13 |                          |    |                                                                                                                                                                                                              |
| 14 | <b>Discussion</b>        |    |                                                                                                                                                                                                              |
| 15 | Key results              | 18 | Summarise key results with reference to study objectives                                                                                                                                                     |
| 16 |                          |    | 6                                                                                                                                                                                                            |
| 17 | Limitations              | 19 | Discuss limitations of the study, taking into account sources of potential bias or imprecision. Discuss both direction and magnitude of any potential bias                                                   |
| 18 |                          |    | 8                                                                                                                                                                                                            |
| 19 |                          |    |                                                                                                                                                                                                              |
| 20 | Interpretation           | 20 | Give a cautious overall interpretation of results considering objectives, limitations, multiplicity of analyses, results from similar studies, and other relevant evidence                                   |
| 21 |                          |    | 6,7                                                                                                                                                                                                          |
| 22 |                          |    |                                                                                                                                                                                                              |
| 23 |                          |    |                                                                                                                                                                                                              |
| 24 | Generalisability         | 21 | Discuss the generalisability (external validity) of the study results                                                                                                                                        |
| 25 |                          |    | 8                                                                                                                                                                                                            |
| 26 | <b>Other information</b> |    |                                                                                                                                                                                                              |
| 27 | Funding                  | 22 | Give the source of funding and the role of the funders for the present study and, if applicable, for the original study on which the present article is based                                                |
| 28 |                          |    | 10                                                                                                                                                                                                           |
| 29 |                          |    |                                                                                                                                                                                                              |
| 30 |                          |    |                                                                                                                                                                                                              |

\*Give information separately for exposed and unexposed groups.

**Note:** An Explanation and Elaboration article discusses each checklist item and gives methodological background and published examples of transparent reporting. The STROBE checklist is best used in conjunction with this article (freely available on the Web sites of PLoS Medicine at <http://www.plosmedicine.org/>, Annals of Internal Medicine at <http://www.annals.org/>, and Epidemiology at <http://www.epidem.com/>). Information on the STROBE Initiative is available at <http://www.strobe-statement.org>.

# BMJ Open

## Benefits of not smoking during pregnancy for Australian Aboriginal and Torres Strait Islander women and their babies: a retrospective cohort study using linked data

|                                 |                                                                                                                                                                                                                                                                                                                                                                                                                                                                                                                                                                                                                                                                                                                                                                                                                                                                                                                                                                                                                                                                                                                                                                                                                                                                                                                                                            |
|---------------------------------|------------------------------------------------------------------------------------------------------------------------------------------------------------------------------------------------------------------------------------------------------------------------------------------------------------------------------------------------------------------------------------------------------------------------------------------------------------------------------------------------------------------------------------------------------------------------------------------------------------------------------------------------------------------------------------------------------------------------------------------------------------------------------------------------------------------------------------------------------------------------------------------------------------------------------------------------------------------------------------------------------------------------------------------------------------------------------------------------------------------------------------------------------------------------------------------------------------------------------------------------------------------------------------------------------------------------------------------------------------|
| Journal:                        | <i>BMJ Open</i>                                                                                                                                                                                                                                                                                                                                                                                                                                                                                                                                                                                                                                                                                                                                                                                                                                                                                                                                                                                                                                                                                                                                                                                                                                                                                                                                            |
| Manuscript ID                   | bmjopen-2019-032763.R3                                                                                                                                                                                                                                                                                                                                                                                                                                                                                                                                                                                                                                                                                                                                                                                                                                                                                                                                                                                                                                                                                                                                                                                                                                                                                                                                     |
| Article Type:                   | Original research                                                                                                                                                                                                                                                                                                                                                                                                                                                                                                                                                                                                                                                                                                                                                                                                                                                                                                                                                                                                                                                                                                                                                                                                                                                                                                                                          |
| Date Submitted by the Author:   | 22-Oct-2019                                                                                                                                                                                                                                                                                                                                                                                                                                                                                                                                                                                                                                                                                                                                                                                                                                                                                                                                                                                                                                                                                                                                                                                                                                                                                                                                                |
| Complete List of Authors:       | <p>McInerney, Carol; The University of Sydney Northern Clinical School, Women and Babies Research; New South Wales Ministry of Health, NSW Biostatistics Training Program</p> <p>Ibiebele, Ibinabo; The University of Sydney Northern Clinical School, Women and Babies Research; Northern Sydney Local Health District, Kolling Institute</p> <p>Ford, Jane; The University of Sydney Northern Clinical School, Women and Babies Research; Northern Sydney Local Health District, Kolling Institute</p> <p>Randall, Deborah; The University of Sydney Northern Clinical School, Women and Babies Research; Northern Sydney Local Health District, Kolling Institute</p> <p>Morris, Jonathan; The University of Sydney Northern Clinical School, Women and Babies Research; Royal North Shore Hospital, Obstetrics and Gynaecology</p> <p>Meharg, David; The University of Sydney Faculty of Health Sciences; The University of Sydney Poche Centre for Indigenous Health</p> <p>Mitchell, Jo ; New South Wales Ministry of Health, Centre for Population Health</p> <p>Milat, Andrew; New South Wales Ministry of Health, Centre for Epidemiology and Evidence</p> <p>Torvaldsen, Siranda; The University of Sydney Northern Clinical School, Women and Babies Research; University of New South Wales School of Public Health and Community Medicine</p> |
| <b>Primary Subject Heading</b>: | Obstetrics and gynaecology                                                                                                                                                                                                                                                                                                                                                                                                                                                                                                                                                                                                                                                                                                                                                                                                                                                                                                                                                                                                                                                                                                                                                                                                                                                                                                                                 |
| Secondary Subject Heading:      | Smoking and tobacco, Epidemiology, Public health                                                                                                                                                                                                                                                                                                                                                                                                                                                                                                                                                                                                                                                                                                                                                                                                                                                                                                                                                                                                                                                                                                                                                                                                                                                                                                           |
| Keywords:                       | Pregnancy, smoking, Aboriginal health, preterm birth, stillbirth, linked data                                                                                                                                                                                                                                                                                                                                                                                                                                                                                                                                                                                                                                                                                                                                                                                                                                                                                                                                                                                                                                                                                                                                                                                                                                                                              |
|                                 |                                                                                                                                                                                                                                                                                                                                                                                                                                                                                                                                                                                                                                                                                                                                                                                                                                                                                                                                                                                                                                                                                                                                                                                                                                                                                                                                                            |

SCHOLARONE™  
Manuscripts

1  
2  
3  
4  
5  
6  
7  
8  
9  
10  
11  
12  
13  
14  
15  
16  
17  
18  
19  
20  
21  
22  
23  
24  
25  
26  
27  
28  
29  
30  
31  
32  
33  
34  
35  
36  
37  
38  
39  
40  
41  
42  
43  
44  
45  
46  
47  
48  
49  
50  
51  
52  
53  
54  
55  
56  
57  
58  
59  
60

# Benefits of not smoking during pregnancy for Australian Aboriginal and Torres Strait Islander women and their babies: a retrospective cohort study using linked data

Carol McInerney,<sup>1,2,3</sup> Ibinabo Ibiebele,<sup>1,3</sup> Jane Ford,<sup>1,3</sup> Deborah Randall,<sup>1,3</sup> Jonathan Morris,<sup>1,3,4</sup> David Meharg,<sup>5,6</sup> Jo Mitchell,<sup>7</sup> Andrew Milat<sup>8</sup> and Siranda Torvaldsen<sup>1,3,9</sup>

<sup>1</sup> The University of Sydney Northern Clinical School, Women and Babies Research, St Leonards, New South Wales, Australia

<sup>2</sup> NSW Biostatistics Training Program, NSW Ministry of Health, Australia

<sup>3</sup> Northern Sydney Local Health District, Kolling Institute, New South Wales, Australia

<sup>4</sup> Department of Obstetrics and Gynaecology, Royal North Shore Hospital, Australia

<sup>5</sup> The University of Sydney, Faculty of Health Sciences, Sydney, New South Wales, Australia.

<sup>6</sup> Poche Centre for Indigenous Health, The University of Sydney, Sydney, New South Wales, Australia.

<sup>7</sup> Centre for Population Health, NSW Ministry of Health, Sydney, Australia

<sup>8</sup> Centre for Epidemiology and Evidence, NSW Ministry of Health, Sydney, Australia

<sup>9</sup> School of Public Health and Community Medicine, UNSW Sydney, Australia

Corresponding author:

Associate Professor Siranda Torvaldsen

Women and Babies Research,

Level 5 Douglas Building,

Royal North Shore Hospital,

St Leonards NSW 2065

AUSTRALIA

Email: [siranda.torvaldsen@sydney.edu.au](mailto:siranda.torvaldsen@sydney.edu.au)

Tel: +612 9462 9812

Keywords: Pregnancy, smoking, Aboriginal health, preterm birth, stillbirth, linked data

Word count: 4,278 (excluding article summary box, references, figure, tables and footnotes)

# Benefits of not smoking during pregnancy for Australian Aboriginal and Torres Strait Islander women and their babies: a retrospective cohort study using linked data

## Abstract

### Objectives

To provide evidence for targeted smoking cessation policy, the aim of this study was to compare pregnancy outcomes of Aboriginal mothers who reported *not* smoking during pregnancy with Aboriginal mothers who reported smoking during pregnancy.

### Design

Population based retrospective cohort study using linked data.

### Setting

New South Wales, the most populous Australian state.

### Population

18,154 singleton babies born to 13,477 Aboriginal mothers between 2010–2014 were identified from routinely collected New South Wales datasets. Aboriginality was determined from birth records and from four linked datasets through an Enhanced Reporting of Aboriginality algorithm.

### Exposure

*Not* smoking at any time during pregnancy.

### Main outcome measures

Unadjusted and adjusted relative risks and 95% confidence intervals from modified Poisson regression were used to examine associations between not smoking during pregnancy and maternal and perinatal outcomes including severe morbidity, inter-hospital transfer, perinatal death, preterm birth and small-for-gestational age. Population attributable fractions (PAFs) were calculated using adjusted relative risks.

### Results

Compared with babies born to mothers who smoked during pregnancy, babies born to non-smoking mothers had a lower risk of all adverse perinatal outcomes including perinatal death (aRR=0.58, 95%CI 0.44–0.76), preterm birth (aRR=0.58, 95%CI 0.53–0.64) and small-for-gestational age (aRR=0.35, 95%CI 0.32–0.39). PAFs(%) were 27% for perinatal death, 26% for preterm birth and 48% for small-for-gestational-age. Compared with women who smoked during pregnancy (n=8,919), those who did not smoke (n=9,235) had a lower risk of being transferred to another hospital (aRR=0.76, 95%CI 0.66–0.89).

### Conclusions

Babies born to women who did not smoke during pregnancy had a lower risk of adverse perinatal outcomes. Rates of adverse outcomes among Aboriginal non-smokers were similar to those among the

1  
2  
3 general population. These results quantify the proportion of adverse perinatal outcomes due to smoking  
4 and highlight why effective smoking cessation programs are urgently required for this population.  
5  
6  
7  
8

## 9 10 Article summary

### 11 12 Strengths and limitations of this study

- 13 • The first study to examine the association between *not* smoking in pregnancy and pregnancy  
14 outcomes among Aboriginal women
- 15 • A large population-based cohort study using whole-of-population linked data
- 16 • To improve ascertainment of Aboriginal status, which is under-recorded on routinely  
17 collected health datasets, we linked four databases and applied an enhanced reporting of  
18 Aboriginality algorithm
- 19 • The inclusion of population attributable fractions quantifies the potential reduction in  
20 adverse perinatal outcomes if it was possible to reduce the smoking during pregnancy rate  
21 to zero.
- 22 • Data on history, heaviness, or passive smoking were not available, nor were data on some  
23 potential confounders such as alcohol consumption  
24  
25  
26  
27  
28

29  
30  
31  
32  
33  
34  
35  
36  
37  
38  
39  
40  
41  
42  
43  
44  
45  
46  
47  
48  
49  
50  
51  
52  
53  
54  
55  
56  
57  
58  
59  
60

review only



## Introduction

In 2008 the Australian federal, state and territory governments committed to reducing the national adult daily smoking rate by 2018, including halving the Aboriginal adult smoking rate.[1] Although smoking rates have substantially declined over this time, they remain high among pregnant Aboriginal women. In 2016, 41% of all pregnant Aboriginal women reported smoking at some time during their pregnancy compared to just 7% of non-Aboriginal women.[2] Smoking during pregnancy is the 'most important preventable risk factor for maternal and infant health'[3], thus smoking cessation for pregnant Aboriginal women remains a key priority for New South Wales (NSW) Health.[4] For the purposes of this study, Aboriginal and/or Torres Strait Islander people were considered together in one group. The reason for this was the small proportion of Torres Strait Islander people living in NSW (an estimated 2.6% of all females of Aboriginal and/or Torres Strait Islander descent[5])and that some people were recorded as both. We respectfully use the term Aboriginal as Aboriginal people are the original inhabitants of NSW.[6]

Australia's anti-tobacco campaigns and smoking cessation strategies are among the most comprehensive in the world, and there is growing evidence that programs specifically targeted to Aboriginal Australians are more effective.[7] There have been several campaigns to promote smoking cessation among pregnant Aboriginal mothers with varying efficacy.[8] To date these have been grounded in evidence from a general population. Although the benefits of not smoking during pregnancy are unlikely to be any different for Aboriginal mothers from the general population, quantifying the benefits of not smoking among Aboriginal mothers may be regarded as more relevant by this population and thus have the potential to influence smoking cessation. The benefits of not smoking during pregnancy are well established [9-13], but no previous studies have demonstrated associations between not smoking in pregnancy and positive pregnancy outcomes *among* Aboriginal women. This study aims to compare pregnancy outcomes of mothers who reported not smoking during pregnancy with those who reported any smoking during pregnancy from the Aboriginal population of NSW. Findings from this study will provide the most relevant evidence to date for pregnant Aboriginal women.

## Methods

### Study population and data sources

The study population consisted of all singleton babies born to Aboriginal women residing in NSW between 1 January 2010 and 31 December 2014 and their mothers. This population-based retrospective cohort study used linked data from routinely collected NSW datasets. The study population was identified from all records in the NSW Perinatal Data Collection ('birth data') for the period 1 January 2010 to 31 December 2014. All births in the population, including births at NSW public and private hospitals and home births are recorded in the birth data. This surveillance system includes all live births and stillbirths of at least 400 grams birthweight or at least 20 weeks gestation.[14]

All deaths within NSW are registered in the Registry of Births, Deaths and Marriages and fact of death was retrieved from these data between 1 January 2010 and 31 December 2015. Public and private hospital admission records were drawn from the NSW Admitted Patient Data Collection ('hospital data')

1  
2  
3 for admissions from 1 September 2009 to 31 December 2014. An additional 4 months of hospital data  
4 were retrieved prior to the start of the study period to allow for admissions to hospital for births early in  
5 2010. Diagnoses coded in the hospital data are applied according to the International Classification of  
6 Diseases, Australian Modification (ICD-10-AM). Records within and across all datasets were  
7 probabilistically linked using personal identifiers by the NSW Centre for Health Record Linkage with an  
8 estimated false linkage rate of less than 5 per 1,000 records.[15] Hospital birth records were those  
9 where the birth was recorded to have occurred between the mother's admission and discharge dates  
10 using the linked birth data. It's estimated that 96% of records from the birth data link to the mother's  
11 and infant's hospital records from the birth.[16]

12  
13  
14  
15  
16 Aboriginal women were defined as those who were recorded as Australian Aboriginal in the birth data  
17 or who were assigned Aboriginal status according to the Enhanced Reporting of Aboriginality (ERA)  
18 algorithm.

### 19 20 21 **Enhanced Reporting of Aboriginality (ERA)**

22 It is widely acknowledged that Aboriginal status is under-recorded on routinely collected health datasets  
23 nationwide.[17] Enhancement of reporting of Aboriginal people using linked records creates a  
24 statistical construct that results in improved information about Aboriginal people. It does not define a  
25 person as being Aboriginal, nor does it replace efforts to improve the overall quality of recording  
26 Aboriginal status at the point of care.

27  
28  
29 Information surrounding individuals' Aboriginal status was pooled via linkage of the birth data, NSW  
30 Registry of Births, Deaths and Marriages birth registrations, hospital data and the NSW Emergency  
31 Department Data Collection. Using this information, a weight of evidence surrounding a woman's  
32 Aboriginal status was determined by a multistage median algorithm.[18] Since multiple datasets were  
33 used and some women had multiple records in each of these datasets, the algorithm initially assigned a  
34 separate status for each woman and dataset. Aboriginal or Torres Strait Islander status was assigned to  
35 a mother if: one or two linked records were available and at least one reported her as Aboriginal; three  
36 or more linked records were available and at least two reported her as Aboriginal. A comparable  
37 algorithm using dataset-specific statuses instead of records was used to determine the inclusion of each  
38 woman in the study population.

39  
40  
41  
42  
43 The enhanced reporting of Aboriginality is a technique used by many research groups.[19-21] Although  
44 this combination of datasets and algorithm has not been used before, similar methods have been found  
45 to minimise the risk of incorrect inclusion while capturing more women than simply relying on a single  
46 record.[22] Details on the algorithm, the data used and the mothers identified through the ERA have  
47 been described in more detail elsewhere.[23]

### 48 49 50 **Exposure**

51 The exposure of interest for this study was not smoking at any time during pregnancy. Mothers who  
52 reported not smoking during pregnancy will henceforth be referred to as non-smokers and those who  
53 reported any smoking during pregnancy are referred to as smokers. To increase ascertainment, birth  
54 data and mother's hospital birth record(s) were used to assign smoking status. If the birth data indicated  
55 that a mother smoked at any time during her pregnancy and/or recorded her as a current smoker within  
56  
57

1  
2  
3 the hospital birth record(s) (according to the ICD-10-AM diagnosis codes Z72.0 and F17) then she was  
4 considered to be a smoker. The sensitivity and specificity of current smoking from the most recent  
5 separation in the hospital data is estimated to be 58.5% and 98.4% respectively.[24] Where a mother  
6 had multiple hospital records associated with the birth and those records contradicted each other  
7 according to smoking status, her smoking status defaulted to that recorded in the birth data.  
8  
9

### 10 Outcomes

11 Maternal outcomes were identified using the birth data and the mother's hospital birth record and  
12 included two binary outcomes: severe maternal morbidity and inter-hospital transfer. Severe maternal  
13 morbidity was defined using a validated composite indicator that captures a broad range of diagnoses  
14 and procedures such as cardiac arrest, renal failure or assisted ventilation.[25] Mothers requiring inter-  
15 hospital transfer were defined as those with at least one record with a mode of separation indicating  
16 transfer or where multiple hospitalisation records were present with differing hospital codes.  
17  
18  
19

20 Perinatal outcomes, including birth outcomes and those occurring within the first 28 days of life for the  
21 baby were retrieved from the birth data and the baby's linked hospital and birth registration records.  
22 These included perinatal death (stillbirth and neonatal death), preterm birth (<37 completed weeks of  
23 gestation), and small for gestational age (birth weight <3<sup>rd</sup> and/or 10<sup>th</sup> percentile for sex and age [26]).  
24 Admissions to a special care nursery (SCN) or neonatal intensive care unit (NICU) were assessed among  
25 an eligible population of babies born in a hospital classified as level 3 or above (NSW Ministry of Health's  
26 *Guide to the Role Delineation of Hospitals*) or a private hospital. Severe neonatal morbidity, measured  
27 according to a validated composite indicator [27], was assessed among all live births.  
28  
29  
30

### 31 Covariates

32 Maternal age and parity were reported according to the birth data. The mother's chronic conditions,  
33 hypertension and diabetes information were obtained from the birth data and the hospital birth  
34 record(s). We used the broad category of any hypertension rather than the specific categories of chronic  
35 hypertension, pregnancy hypertension, preeclampsia and eclampsia, as there is known misclassification  
36 among types of hypertension [28]. The NSW ranking of the Australian Bureau of Statistics (ABS) 2011  
37 Socio-Economic Index for Areas (SEIFA) Index of Relative Socio-Economic Disadvantage (IRSD) and the  
38 2011 Remoteness Areas were used to assess the mother's relative socio-economic status and access to  
39 services respectively. Where available, the mother's 2011 Statistical Local Area (SLA) according to her  
40 birth data was used to assign these measures. Otherwise, and for all babies born in 2010, the mother's  
41 2010 SLA was used. Hospital type is an indicator of the size of a hospital and its location (urban or  
42 regional)[29] and was assigned using the hospital code recorded in the birth data.  
43  
44  
45  
46  
47

### 48 Statistical analyses

49 The study population was described using frequencies and percentages by potential confounders and  
50 the mother's smoking status. Summary statistics were calculated by mother's smoking status to  
51 investigate the associations between smoking during pregnancy and maternal and child outcomes. To  
52 estimate the unadjusted and adjusted relative risk (RR) of binary outcomes while accounting for the  
53 correlation within the data (some mothers had more than one baby during the study period), an  
54 extension to the modified Poisson regression [30] was used with an unstructured correlation matrix.  
55 Those observations where data were missing for an outcome were excluded from analysis for that  
56  
57  
58  
59  
60

1  
2  
3 outcome. SAS for Windows 9.4 (SAS Institute, Cary, NC, USA) was used for all data manipulation and  
4 analysis.  
5

6  
7 In view of the established causal relationship between smoking and adverse perinatal outcomes, we  
8 quantified the proportion and number of adverse perinatal outcomes that would not have occurred in  
9 this population if all the mothers had been non-smokers during pregnancy. We used the formula:  $PAF = [P_s(RR_s - 1)] / RR_s$ , where  $P_s$  is the proportion of babies with the outcome whose mothers smoked and  $RR_s$   
10 is the adjusted RR for smokers. The  $RR_s$  is the inverse of the RR for non-smokers.  
11  
12

### 13 **Patient and public involvement**

14 An Aboriginal advisory committee was consulted prior to submission of the study proposal to ethics  
15 committees and throughout the process. The committee provided guidance on presentation and  
16 interpretation of results. It was of particular importance to members of the committee that the results  
17 were framed positively, ie the *benefits* of not smoking, rather than the risks of smoking. It was also  
18 important to committee members that all comparisons were among Aboriginal women and that  
19 Aboriginal women were not compared with non-Aboriginal women. There are plans to develop  
20 culturally appropriate educational material based on the results of this research and in collaboration  
21 with Aboriginal Health Workers and others involved in the care of Aboriginal women who are pregnant  
22 or may be planning a pregnancy.  
23  
24  
25  
26

### 27 **Results**

28  
29 Following exclusion of duplicates (n=76), a total of 487,388 babies were born to 379,116 mothers in  
30 NSW and were assessed for inclusion in this study. Records for 16,904 babies born to 12,720 mothers  
31 who were recorded as Aboriginal in the birth data were available for analysis. An additional 1,921 babies  
32 born to 1,624 mothers were identified as eligible for inclusion in the study using the ERA. Of the total  
33 18,825 babies, 557 were from a multiple birth and 114 were born to mothers who were not residents of  
34 NSW. These babies did not meet the eligibility criteria and were excluded. Thus the final study  
35 population consisted of 18,154 singleton babies born to 13,477 Aboriginal mothers. Figure 1 outlines the  
36 flow of participants in this study.  
37  
38  
39  
40

41 Among the study population, 9,235 (51%) babies were born to non-smoking mothers and 8,919 (49%)  
42 were born to smoking mothers (Table 1). Only two percent of all linked records had contradictory  
43 smoking statuses from the birth and hospital data. For comparison, when smoking status was assigned  
44 only according to the birth data, 52% of babies were born to non-smoking mothers and 48% were born  
45 to smoking mothers. Mothers who reported not smoking at any time during their pregnancy were  
46 generally less disadvantaged than their smoking counterparts; approximately 8.1% of non-smoking  
47 mothers were in the highest SEIFA quintile, compared to just 4.1% of smoking mothers. Non-smoking  
48 mothers were older, lived in less remote regions and had fewer previous pregnancies than smoking  
49 mothers. The number of non-smoking mothers with hypertension (1,106) was almost double that of  
50 smoking mothers (578) and slightly more non-smoking mothers had diabetes (Table 1).  
51  
52  
53  
54

55 The majority (70%) of mothers only had one baby during the study period however a substantial number  
56 had multiple: 25% had two, 4.4% had three and 0.4% had four. For 564 (4%) mothers, their smoking  
57  
58  
59

1  
2  
3 status changed between pregnancies, 6,814 (53%) mothers reported not smoking in all pregnancies  
4 during the study period and 6,099 (47%) consistently reported smoking. Of the 564 mothers whose  
5 smoking status changed between pregnancies, 266 (47%) changed from smoking to non-smoking, 271  
6 (48%) changed from non-smoking to smoking in all subsequent pregnancies and 27 (5%) moved  
7 between smoker and non-smoker status.  
8  
9

10 The rate of severe maternal morbidity was low (<3%) and not significantly different between smoking  
11 and non-smoking mothers (Table 2). The rate of inter-hospital transfer was lower in the non-smoking  
12 group at 3.7% compared with the smoking group (5.1%), with an adjusted relative risk of RR=0.76 (95%  
13 CI 0.66, 0.89).  
14  
15

16 Adverse perinatal outcomes occurred less frequently among babies born to non-smoking mothers (Table  
17 3). Perinatal deaths were rare in both populations however the rate was lower in the non-smoking  
18 group with perinatal death occurring in 1.0% of babies born to non-smoking mothers, compared to 1.8%  
19 in smoking mothers. Also, severe neonatal morbidity and admission to SCN or NICU was less frequent in  
20 babies born to non-smoking mothers when compared to those born to smoking mothers. Overall, the  
21 gestational age of babies from the non-smoking group was closer to term than those from the smoking  
22 group; more babies born to non-smoking mothers (66%) were born between 39 and 41 weeks than  
23 those born to smoking mothers (55%). Preterm birth was considerably less frequent among babies born  
24 to mothers who did not smoke during pregnancy; 8.2% of births to non-smoking mothers were preterm  
25 compared to 14% from smoking mothers. Similarly, babies born to non-smoking mothers were less often  
26 small for gestational age, with 2.0% and 7.0% of these babies having a birthweight below the 3rd and  
27 10th percentiles respectively compared to 7.3% and 20% of babies of smoking mothers. All relative risks  
28 were less than 1, suggesting a reduced risk of all adverse outcomes among babies born to non-smoking  
29 mothers when compared to those born to smoking mothers. Of note were the relative risks for perinatal  
30 death (RR=0.58 95% CI 0.44, 0.76), preterm birth (RR=0.58 95% CI 0.53, 0.64) and small for gestational  
31 age (<10<sup>th</sup> percentile; RR=0.35 95% CI 0.32, 0.39). As indicated by the PAFs (%) in Table 3, more than a  
32 quarter of the perinatal deaths and preterm births were attributable to smoking and almost half the  
33 small for gestational age births. Among this cohort of babies, this equates to 68 perinatal deaths, 540  
34 preterm births and 1,131 small for gestational age (<10<sup>th</sup> percentile) babies attributable to smoking.  
35  
36  
37  
38  
39  
40  
41  
42

## 43 Discussion

44 This study of a recent population of pregnant Aboriginal women clearly demonstrates improved  
45 pregnancy outcomes among Aboriginal mothers who reported not smoking during pregnancy when  
46 compared to Aboriginal mothers who reported smoking during pregnancy. Benefits of not smoking were  
47 found for all the perinatal outcomes we examined. We also found non-smoking mothers had a 24%  
48 lower risk of being transferred to another hospital during the birth admission than smoking mothers of  
49 similar demographics. Inter-hospital transfers may be due to complications arising before, during or  
50 after the birth. This means women are less likely to be away from their family and country during this  
51 challenging time. Although a slightly lower risk of severe maternal morbidity was found in the non-  
52 smoking group, there was not sufficient evidence to suggest a true difference existed as the confidence  
53  
54  
55  
56  
57  
58  
59  
60

1  
2  
3 interval included 1 (RR=0.92, 95% CI 0.77–1.11). Other risk factors may be more strongly associated with  
4 severe maternal morbidity than smoking.  
5

6  
7 Among babies born to mothers of a similar age, with similar pre-existing conditions (any diabetes or  
8 hypertension), parity and socio-economic status, those with a non-smoking mother had a 42% less risk  
9 of perinatal death and preterm birth, 65% less risk of being small-for-gestational age (<10<sup>th</sup> percentile),  
10 30% less risk of severe neonatal morbidity, and 33% less risk of being admitted to a SCN or NICU than  
11 those born to a mother who smoked at any time during her pregnancy. The reductions in adverse  
12 outcomes for babies born to non-smoking mothers were statistically and clinically significant and  
13 remained so even after adjustment. Encouragingly, despite some rates being marginally higher, overall  
14 very little difference exists between the rates of adverse perinatal outcomes among the non-smoking  
15 Aboriginal mothers in this study and the overall NSW population of mothers giving birth in 2014, of  
16 whom 9.3% reported smoking and 3.9% were recorded as Aboriginal.[14] The high PAFs for the adverse  
17 perinatal outcomes highlight the enormous potential for health improvements in this population. Over a  
18 quarter of the perinatal deaths and preterm births were attributable to smoking. Being born small for  
19 gestational age is associated with short and long-term health sequelae, and these risks are even greater  
20 for babies born with a birthweight less than the third percentile for gestational age and sex. The PAF(%)  
21 was highest (57%) for being born with a birthweight less than the third percentile. Almost half (48%) the  
22 babies born small for gestational age (<10<sup>th</sup> percentile) could have had a normal birthweight (≥10<sup>th</sup>  
23 percentile) in the absence of smoking. Our results are consistent with a recent study of a cohort of  
24 697,003 children born in Scotland from 1997–2009 [31]. In addition to the adverse perinatal outcomes  
25 attributable to smoking, this study followed children until five years of age and found that maternal  
26 smoking during pregnancy also increased the risk of the child being hospitalized with acute respiratory  
27 infections, bronchiolitis, asthma and bacterial meningitis [31].  
28  
29  
30  
31  
32  
33

34 As expected, and similar to findings from other studies, [31,32] mothers from the non-smoking group  
35 were less disadvantaged, older, resided in less remote regions and had fewer previous pregnancies than  
36 those from the smoking group. Diabetes and hypertension were more prevalent among non-smoking  
37 mothers than smoking mothers. The small difference in prevalence of diabetes (8.7% vs 6.5%) could be  
38 due to the non-smoking group being slightly older than the smoking group. However the prevalence of  
39 hypertension in non-smoking mothers was almost double that of smoking mothers (12% vs 6.5%). Whilst  
40 this finding may surprise some, it is consistent with findings from previous studies [33–36]. A systematic  
41 review of 48 studies concluded that smoking during pregnancy reduces the risk of preeclampsia by up to  
42 50% and that there is a dose-response relationship [34]. Similar results have been reported when the  
43 outcome includes gestational hypertension as well as preeclampsia, and the protective effect appears to  
44 continue even after women quit smoking later in pregnancy [36]. This protective effect may be  
45 mediated via the biological effects of carbon monoxide that is formed during smoking [35]. However,  
46 when preeclampsia does occur, the outcomes are much worse for babies whose mothers smoked [33].  
47 Although preeclampsia is associated with adverse pregnancy outcomes, and smoking reduces the  
48 incidence of preeclampsia, the net effect of smoking is still a worsening of pregnancy outcomes and  
49 there are dose-dependent increases in perinatal deaths and SGA babies among mothers who smoke  
50 [33]. Hence these findings in no way indicate any benefit to mothers or babies if the mother smokes  
51 during pregnancy.  
52  
53  
54  
55  
56  
57

1  
2  
3 As well as being a national health priority in Australia, reducing smoking during pregnancy is a key  
4 performance indicator in the annual service agreements between the NSW Ministry of Health and Local  
5 Health Districts.[37] As part of this commitment, the Quit for New Life program was established in 2013  
6 with the aim to support women having an Aboriginal baby to quit smoking. The program was integrated  
7 into Aboriginal Maternal and Infant Health Services and has supported over 2,500 pregnant women, 950  
8 postnatal women and 1,650 cohabitants in their quit attempt.[38] However, further efforts including  
9 health professional training, expansion to other maternal health services and community programs, and  
10 improved data collection and reporting are required to reduce the prevalence of smoking in pregnancy  
11 in this population. Investment to discourage women, especially young women, from taking up smoking  
12 and encouraging and appropriately supporting smokers to quit need to remain priorities.  
13  
14  
15

16  
17 Health professionals have a critical role in communicating the benefits of not smoking during pregnancy  
18 found in this study. However some practitioners perceive intervention to be ineffective and thus may  
19 not raise this issue with their patients.[39] The highly relevant evidence from this study may increase the  
20 salience of the issue and provide further motivation for health professionals to consistently ask and  
21 advise about smoking.  
22  
23

24 While the health impacts of smoking on maternal and child health are well known [9-13], this study  
25 provides local information that can be used to further engage Australian health professionals and  
26 community members on the benefits of not smoking. Building on the strength and resilience of  
27 Aboriginal people is an important foundation for efforts to reduce smoking among this population.[40]  
28 Using local evidence on the *benefits* of not smoking during pregnancy has the potential to re-frame  
29 health messages for women, their families and communities and to mobilise community action to  
30 achieve better health outcomes.  
31  
32  
33

### 34 **Strengths and limitations**

35 This is the first study we are aware of that examines associations between smoking in pregnancy and  
36 adverse pregnancy outcomes exclusively among Aboriginal and/or Torres Strait Islander women. This  
37 was a large population-based study. Using data linkage, we were able to capture more women through  
38 the ERA, further increasing our sample size. Despite the unavailability of information surrounding some  
39 potential confounders, including individual level socioeconomic status, our findings were consistent with  
40 those among other populations from the literature [9-13]. Limited data on the heaviness of smoking  
41 during pregnancy meant that potential dose effects could not be calculated. However, new data around  
42 quitting in pregnancy is available from 2016 onward so there is potential for future work to examine this  
43 phenomenon further. Similarly, no information was available on the mother's history of smoking,  
44 exposure to environmental tobacco smoke or alcohol consumption and so effects from longer term  
45 smoking and potential confounding from alcohol consumption could not be accounted for. A lack of data  
46 surrounding history and heaviness of smoking means that the treatment effects estimated in this study  
47 are likely to be biased toward the null and thus underestimate the true benefits of not smoking in  
48 pregnancy. Under-ascertainment of smoking status would similarly bias toward the null. Mothers who  
49 smoked in one pregnancy but not in a subsequent pregnancy were classified as non-smokers in the  
50 subsequent pregnancy. If these mothers were more likely to have worse outcomes in the subsequent  
51  
52  
53  
54  
55  
56  
57  
58  
59  
60

pregnancy compared with never smoking mothers, this would also bias towards the null. However, any effect would be negligible due to the very low numbers (<2% of the study population).

## Conclusions

Babies born to Aboriginal mothers who did not smoke during pregnancy were at a significantly reduced risk of adverse perinatal outcomes compared to those born to smoking mothers of similar demographics. Rates of these adverse outcomes among Aboriginal women who did not smoke were very similar to those among the general NSW population.

These results reinforce the importance of targeted smoking cessation policy for Aboriginal women. Barriers to smoking cessation in this population are complex and it is vital that this evidence is provided concurrently with sufficient support to enable Aboriginal women to quit smoking. Distributing this information in isolation runs the risk of furthering shame and stress experienced by pregnant women and may discourage them from seeking further help, highlighting the importance of systematic approaches to encourage and support Aboriginal women to quit smoking.

## Acknowledgements

The authors would like to thank the members of the Aboriginal Advisory Committee who provided valuable advice, the NSW Ministry of Health for providing access to the datasets used and the Centre for Health Record Linkage for linking these datasets.

## Footnotes

### Copyright

The Corresponding Author has the right to grant on behalf of all authors and does grant on behalf of all authors, a worldwide licence to the Publishers and its licensees in perpetuity, in all forms, formats and media (whether known now or created in the future), to i) publish, reproduce, distribute, display and store the Contribution, ii) translate the Contribution into other languages, create adaptations, reprints, include within collections and create summaries, extracts and/or, abstracts of the Contribution, iii) create any other derivative work(s) based on the Contribution, iv) to exploit all subsidiary rights in the Contribution, v) the inclusion of electronic links from the Contribution to third party material wherever it may be located; and, vi) licence any third party to do any or all of the above.

### Contributors

JMitchell and AM had the initial idea for this study. ST wrote the study proposal and was responsible for the ethics application and revisions to the manuscript. CM undertook all analyses, with guidance from ST, II and DR, and drafted the manuscript. JF, JMorris, JMitchell, AM and ST all contributed to the design of the study and, with DM, the interpretation of the results. All authors commented on drafts and read and approved the final manuscript. The corresponding author attests that all listed authors meet authorship criteria and that no others meeting the criteria have been omitted. CM and ST are guarantors.



### Statement of Conflicts of Interest

All authors have completed the ICMJE uniform disclosure form at [www.icmje.org/coi\\_disclosure.pdf](http://www.icmje.org/coi_disclosure.pdf) and declare: CM and ST's salaries came from a Prevention Research Support Program grant from the NSW Ministry of Health, no other relationships or activities that could appear to have influenced the submitted work.

### Funding Statement

This work was supported by a NSW Ministry of Health Prevention Research Support Program grant. This work was completed while Carol McInerney was employed as a trainee on the NSW Biostatistics Training Program funded by the NSW Ministry of Health. She undertook this work whilst based at the Women and Babies Research, Kolling Institute, Northern Sydney Local Health District. Carol McInerney and Siranda Torvaldsen are supported by the NSW Ministry of Health Prevention Research Support Program grant. The funder had no role in the study design, analysis or interpretation of the data or in the writing of the report. However, the NSW Ministry of Health requires all Biostatistics Trainees to seek their approval before submitting a manuscript for publication.

### Ethics approval

Ethics approval for this study was given by the Aboriginal Health and Medical Research Council of New South Wales, Australia (HREC reference number: 1326/17) and was exempt from informed consent requirements as there was no contact with the study population and the authors only had access to de-identified data.

### Transparency statement

The lead author affirms that the manuscript is an honest, accurate, and transparent account of the study being reported; that no important aspects of the study have been omitted; and that any discrepancies from the study as planned have been explained.

### Data sharing

No additional data are available.

## References

1. Department of Health. Tobacco Control - key facts and figures 2018 [Available from: <http://www.health.gov.au/internet/publications/publishing.nsf/Content/tobacco-control-toc>.
2. Centre for Epidemiology and Evidence. NSW Mothers and Babies 2016. Sydney: NSW Ministry of Health. 2017.
3. Gould GS, Cadet-James Y, Clough AR. Getting over the shock: taking action on Indigenous maternal smoking. *Aust J Prim Health*. 2016;22(4):276-82.
4. NSW Ministry of Health. Snapshot of Tobacco Strategy 2012-2017. 2017.
5. Australian Bureau of Statistics. Estimates of Aboriginal and Torres Strait Islander Australians, June 2011. 2013 [Available from: <http://www.abs.gov.au/ausstats/abs@.nsf/mf/3238.0.55.001>.
6. NSW Department of Health. Communicating positively - A guide to appropriate Aboriginal terminology. Sydney, Australia: NSW Department of Health 2004.
7. Carson KV, Brinn MP, Peters M, Veale A, Esterman AJ, Smith BJ. Interventions for smoking cessation in Indigenous populations. *Cochrane database of systematic reviews (Online)*. 2012;1.
8. Passey ME, Sanson-Fisher RW, Stirling JM. Supporting Pregnant Aboriginal and Torres Strait Islander Women to Quit Smoking: Views of Antenatal Care Providers and Pregnant Indigenous Women. *Matern Child Health J*. 2014;18(10):2293-9.
9. Cnattingius S. The epidemiology of smoking during pregnancy: smoking prevalence, maternal characteristics, and pregnancy outcomes. *Nicotine & tobacco research : official journal of the Society for Research on Nicotine and Tobacco*. 2004;6 Suppl 2:S125-40.
10. Marufu TC, Ahankari A, Coleman T, Lewis S. Maternal smoking and the risk of still birth: systematic review and meta-analysis. *BMC public health*. 2015;15:239.
11. Mendelsohn C, Gould GS, Oncken C. Management of smoking in pregnant women. *Australian family physician*. 2014;43(1):46-51.
12. Salihi HM, Wilson RE. Epidemiology of prenatal smoking and perinatal outcomes. *Early Hum Dev*. 2007;83(11):713-20.
13. US Department of Health and Human Services. The Health Consequences of Smoking—50 Years of Progress: A Report of the Surgeon General. . In: US Department of Health and Human Services CfDCaP, National Center for Chronic Disease Prevention and Health Promotion, Office on Smoking and Health, editor. Atlanta, GA2014.
14. Centre for Epidemiology and Evidence. NSW Mothers and Babies 2014. Sydney, Australia: NSW Ministry of Health; 2016.
15. Centre for Health Record Linkage [Internet]. Quality Assurance 2018 [Available from: <http://www.cherel.org.au/quality-assurance>.
16. Bentley JP, Ford JB, Taylor LK, Irvine KA, Roberts CL. Investigating linkage rates among probabilistically linked birth and hospitalization records. *BMC Medical Research Methodology*. 2012;12.
17. Australian Institute of Health and Welfare and Australian Bureau of Statistics. National best practice guidelines for data linkage activities relating to Aboriginal and Torres Strait Islander people. Canberra, Australia: AIHW; 2012. Contract No.: Cat. No. IHW 74.
18. Christensen D, Davis G, Draper G, Mitrou F, McKeown S, Lawrence D, et al. Evidence for the use of an algorithm in resolving inconsistent and missing Indigenous status in administrative data collections. *Austr J Soc Iss*. 2014;49(4):423-43.
19. Population and Public Health Division. Improved reporting of Aboriginal and Torres Strait Islander peoples on population datasets in New South Wales using record linkage—a feasibility study. Sydney, Australia: NSW Ministry of Health; 2012.

20. Xu F, Sullivan EA, Madden RC, Black D, Pulver LR. Improvement of maternal Aboriginality in NSW birth data. *BMC Med Res Methodol*. 2012;12:8.
21. Taylor LK, Bentley J, Hunt J, Madden R, McKeown S, Brandt P, Baker D. Enhanced reporting of deaths among Aboriginal and Torres Strait Islander peoples using linked administrative health datasets. *BMC Medical Research Methodology*. 2012;12(1).
22. Gibberd AJ, Simpson JM, Eades SJ. Use of family relationships improved consistency of identification of Aboriginal people in linked administrative data. *J Clin Epidemiol*. 2017;90:144-55.
23. McInerney C, Ibiebele I, Torvaldsen S, Ford JB, Morris JM, Nelson M, Randall DA. Defining a study population using enhanced reporting of Aboriginality and the effects on study outcomes. *International Journal of Population Data Science*. 2019;In press.
24. Havard A, Jorm LR, Lujic S. Risk adjustment for smoking identified through tobacco use diagnoses in hospital data: A validation study. *PLoS ONE*. 2014;9(4).
25. Roberts CL, Cameron CA, Bell JC, Algert CS, Morris JM. Measuring maternal morbidity in routinely collected health data: Development and validation of a maternal morbidity outcome indicator. *Med Care*. 2008;46(8):786-94.
26. Dobbins TA, Sullivan EA, Roberts CL, Simpson JM. Australian national birthweight percentiles by sex and gestational age, 1998-2007. *Med J Aust*. 2012;197(5):291-4.
27. Lain SJ, Algert CS, Nassar N, Bowen JR, Roberts CL. Incidence of severe adverse neonatal outcomes: Use of a composite indicator in a population cohort. *Matern Child Health J*. 2012;16(3):600-8.
28. Roberts CL, Bell JC, Ford JB, Hadfield RM, Algert CS, Morris JM. The accuracy of reporting of the hypertensive disorders of pregnancy in population health data. *Hypertension in Pregnancy*. 2008;27(3):285-97.
29. Falster MO, Roberts CL, Ford J, Morris J, Kinnear A, Nicholl M. Development of a maternity hospital classification for use in perinatal research. *NSW Public Health Bulletin*. 2012;23(1-2):12-6.
30. Zou GY, Donner A. Extension of the modified Poisson regression model to prospective studies with correlated binary data. *Stat Methods Med Res*. 2013;22(6):661-70.
31. Lawder R, Whyte B, Wood R, Fischbacher C, Tappin D. Impact of maternal smoking on early childhood health: a retrospective cohort linked dataset analysis of 697 003 children born in Scotland 1997–2009. *BMJ Open*. 2019;9(0:e023213).
32. Cnattingius S. The epidemiology of smoking during pregnancy: Smoking prevalence, maternal characteristics, and pregnancy outcomes. *Nicotine & Tobacco Research*. 2004;6:125-40.
33. Cnattingius S, Mills JL, Yuen J, Eriksson O, Salonen H. The paradoxical effect of smoking in preeclamptic pregnancies: smoking reduces the incidence but increases the rates of perinatal mortality, abruptio placentae, and intrauterine growth restriction. *American Journal of Obstetrics & Gynecology*. 1997;177(1):156-61.
34. England L, Zhang J. Smoking and risk of preeclampsia: a systematic review. *Frontiers in Bioscience*. 2007;12:2471-83.
35. Karumanchi SA, Levine RJ. How does smoking reduce the risk of preeclampsia? *Hypertension*. 2010;55(5):1100-1.
36. Zhang J, Klebanoff MA, Levine RJ, Puri M, Moyer P. The puzzling association between smoking and hypertension during pregnancy. *American Journal of Obstetrics & Gynecology*. 1999;181(6):1407-13.
37. New South Wales Health. NSW Health Service Agreement 2017 [Available from: <https://www.health.nsw.gov.au/Performance/Documents/service-agreement-generic.pdf>].
38. Centre for Population Health. Quit for New Life: New South Wales Health,; 2018 [Available from: <https://www.health.nsw.gov.au/tobacco/Pages/quit-for-new-life.aspx>].

- 1  
2  
3 39. The Royal Australian College of General Practitioners. Supporting Smoking Cessation 2014  
4 [Available from: [https://www.racgp.org.au/your-practice/guidelines/smoking-cessation/the-role-of-](https://www.racgp.org.au/your-practice/guidelines/smoking-cessation/the-role-of-health-professionals/)  
5 [health-professionals/](https://www.racgp.org.au/your-practice/guidelines/smoking-cessation/the-role-of-health-professionals/).  
6  
7 40. Aboriginal Health & Medical Research Council of NSW and NSW Ministry of Health. The ATRAC  
8 Framework: A strategic framework for Aboriginal tobacco resistance and control in NSW. Sydney,  
9 Australia. 2014.  
10 41. Chen JS, Roberts CL, Simpson JM, Ford JB. Use of hospitalisation history (lookback) to determine  
11 prevalence of chronic diseases: Impact on modelling of risk factors for haemorrhage in pregnancy. BMC  
12 Medical Research Methodology. 2011;11.  
13  
14  
15  
16  
17  
18  
19  
20  
21  
22  
23  
24  
25  
26  
27  
28  
29  
30  
31  
32  
33  
34  
35  
36  
37  
38  
39  
40  
41  
42  
43  
44  
45  
46  
47  
48  
49  
50  
51  
52  
53  
54  
55  
56  
57  
58  
59  
60

For peer review only

Figure caption:

Figure 1 Flow diagram of mothers and babies eligible for inclusion in the final study population.

Table 1 Demographics at the time of birth of all Aboriginal or Torres Strait Islander mothers who gave birth to at least one singleton baby in NSW between 2010 and 2014 reported for all births and by smoking status during pregnancy.

|                               | All births |     | Non-smoking                   |     | Smoking                      |     |
|-------------------------------|------------|-----|-------------------------------|-----|------------------------------|-----|
|                               | N = 18,154 |     | N <sub>ns</sub> = 9,235 (51%) |     | N <sub>s</sub> = 8,919 (49%) |     |
| Year of baby's birth          | n          | %   | n                             | %   | n                            | %   |
| 2010                          | 3,487      | 19  | 1,740                         | 50* | 1,747                        | 50* |
| 2011                          | 3,380      | 19  | 1,638                         | 48* | 1,742                        | 52* |
| 2012                          | 3,680      | 20  | 1,833                         | 50* | 1,847                        | 50* |
| 2013                          | 3,716      | 20  | 1,944                         | 52* | 1,772                        | 48* |
| 2014                          | 3,891      | 21  | 2,080                         | 53* | 1,811                        | 47* |
| <b>Maternal age</b>           |            |     |                               |     |                              |     |
| Under 20                      | 3,214      | 18  | 1,568                         | 17  | 1,646                        | 19  |
| 20–24                         | 6,014      | 33  | 2,983                         | 32  | 3,031                        | 34  |
| 25–29                         | 4,608      | 25  | 2,381                         | 26  | 2,227                        | 25  |
| 30–34                         | 2,729      | 15  | 1,455                         | 16  | 1,274                        | 14  |
| 35 and over                   | 1,589      | 8.8 | 848                           | 9.2 | 741                          | 8.3 |
| Total                         | 18,154     | 100 | 9,235                         | 100 | 8,919                        | 100 |
| <b>Parity</b>                 |            |     |                               |     |                              |     |
| 0                             | 6,259      | 35  | 3,720                         | 40  | 2,539                        | 29  |
| 1                             | 4,709      | 26  | 2,589                         | 28  | 2,120                        | 24  |
| 2                             | 3,107      | 17  | 1,490                         | 16  | 1,617                        | 18  |
| 3+                            | 4,072      | 22  | 1,431                         | 16  | 2,641                        | 30  |
| Total                         | 18,147     | 100 | 9,230                         | 100 | 8,917                        | 100 |
| <b>SEIFA IRSD quintiles**</b> |            |     |                               |     |                              |     |
| 1st – most disadvantaged      | 4,827      | 27  | 2,131                         | 23  | 2,696                        | 30  |
| 2nd                           | 3,674      | 20  | 1,887                         | 21  | 1,787                        | 20  |
| 3rd                           | 5,375      | 30  | 2,806                         | 31  | 2,569                        | 29  |
| 4th                           | 3,068      | 17  | 1,617                         | 18  | 1,451                        | 16  |
| 5th – least disadvantaged     | 1,115      | 6.2 | 748                           | 8.1 | 367                          | 4.1 |
| Total                         | 18,059     | 100 | 9,189                         | 100 | 8,870                        | 100 |
| <b>Remoteness area</b>        |            |     |                               |     |                              |     |
| Major cities                  | 4,193      | 23  | 2,246                         | 24  | 1,947                        | 22  |
| Inner regional                | 6,147      | 34  | 3,310                         | 36  | 2,837                        | 32  |
| Outer regional                | 6,097      | 34  | 2,966                         | 32  | 3,131                        | 35  |
| Remote                        | 1,027      | 5.7 | 421                           | 4.6 | 606                          | 6.8 |
| Very remote                   | 595        | 3.3 | 245                           | 2.7 | 350                          | 4.0 |
| Total                         | 18,059     | 100 | 9,188                         | 100 | 8,871                        | 100 |

| <b>Hospital level</b>                 |        |     |       |     |       |     |
|---------------------------------------|--------|-----|-------|-----|-------|-----|
| Tertiary                              | 4,099  | 23  | 2,108 | 23  | 1,991 | 22  |
| Small and medium urban                | 308    | 1.7 | 178   | 1.8 | 130   | 1.5 |
| Large urban                           | 2,895  | 16  | 1,607 | 9   | 1,288 | 14  |
| Small regional                        | 3,441  | 19  | 1,519 | 16  | 1,922 | 22  |
| Medium regional                       | 3,042  | 17  | 1,550 | 17  | 1,492 | 17  |
| Large regional                        | 3,897  | 21  | 1,896 | 21  | 2,001 | 22  |
| Private                               | 336    | 1.7 | 323   | 3.2 | 13    | 0.2 |
| Other                                 | 136    | 0.7 | 54    | 0.6 | 82    | 0.9 |
| Total                                 | 18,154 | 100 | 9,235 | 100 | 8,919 | 100 |
| <b>Chronic conditions<sup>^</sup></b> |        |     |       |     |       |     |
| Yes                                   | 343    | 1.9 | 147   | 1.6 | 196   | 2.2 |
| Total                                 | 18,154 | 100 | 9,235 | 100 | 8,919 | 100 |
| <b>Any hypertension</b>               |        |     |       |     |       |     |
| Yes                                   | 1,684  | 9.3 | 1,106 | 12  | 578   | 6.5 |
| Total                                 | 18,154 | 100 | 9,235 | 100 | 8,919 | 100 |
| <b>Any diabetes</b>                   |        |     |       |     |       |     |
| Yes                                   | 1,413  | 7.8 | 804   | 8.7 | 609   | 6.5 |
| Total                                 | 18,154 | 100 | 9,235 | 100 | 8,919 | 100 |

\* Percentage of all births within each year.

\*\*Socio-Economic Index for Areas – Index of Relative Socio-Economic Disadvantage (SEIFA IRSD). When ranking areas within NSW in order of their relative disadvantage, the lowest 20% (most disadvantaged) fall in the 1<sup>st</sup> quintile and the highest 20% (least disadvantaged) fall in 5<sup>th</sup> quintile.

<sup>^</sup>Chronic conditions encompasses renal, cardiac, thyroid, asthma, psychiatric, and other autoimmune conditions[41].

Table 2 Frequencies of maternal outcomes at the time of birth of all Aboriginal mothers by smoking status during pregnancy.

|                                  | All births |     | Non-smoking             |     | Smoking                |     | Unadjusted           | Adjusted               |
|----------------------------------|------------|-----|-------------------------|-----|------------------------|-----|----------------------|------------------------|
|                                  | N = 18,154 |     | N <sub>ns</sub> = 9,235 |     | N <sub>s</sub> = 8,919 |     |                      |                        |
|                                  | n          | %   | n                       | %   | n                      | %   | RR (95% CI)          | RR (95% CI)            |
| <b>Severe maternal morbidity</b> |            |     |                         |     |                        |     |                      |                        |
| Yes                              | 523        | 2.9 | 257                     | 2.8 | 266                    | 3.0 | 0.94<br>(0.79, 1.12) | 0.92*<br>(0.77, 1.11)  |
| <b>Inter-hospital transfer</b>   |            |     |                         |     |                        |     |                      |                        |
| Yes                              | 793        | 4.4 | 337                     | 3.7 | 456                    | 5.1 | 0.73<br>(0.63, 0.84) | 0.76**<br>(0.66, 0.89) |

\*adjusted for maternal age, any hypertension, any diabetes, parity and socio-economic status (SEIFA).

\*\* adjusted for maternal age, any hypertension, any diabetes, parity and remoteness area.

Table 3 Frequencies of perinatal outcomes among all babies born to Aboriginal or Torres Strait Islander mothers by maternal smoking status.

|                                                                              | NSW population<br>[14] | All births |     | Non-smoking             |       | Smoking                |       | Unadjusted           | Adjusted*            | PAF (%) |
|------------------------------------------------------------------------------|------------------------|------------|-----|-------------------------|-------|------------------------|-------|----------------------|----------------------|---------|
|                                                                              |                        | N = 18,154 |     | N <sub>ns</sub> = 9,235 |       | N <sub>s</sub> = 8,919 |       |                      |                      |         |
| Preterm birth (<37 wks)                                                      | %                      | n          | %   | n                       | %     | n                      | %     | RR (95% CI)          | RR (95% CI)          |         |
| Yes                                                                          | 8                      | 2,045      | 11  | 760                     | 8.2   | 1,285                  | 14    | 0.59<br>(0.54, 0.64) | 0.58<br>(0.53, 0.64) | 26      |
| Total                                                                        |                        | 18,154     | 100 | 9,235                   | 100   | 8,919                  | 100   |                      |                      |         |
| <b>Small for gestational age (&lt;3<sup>rd</sup> population percentile)</b>  |                        |            |     |                         |       |                        |       |                      |                      |         |
| Yes                                                                          | 3                      | 835        | 4.6 | 183                     | 2.0   | 652                    | 7.3   | 0.28<br>(0.23, 0.32) | 0.27<br>(0.23, 0.32) | 57      |
| Total                                                                        |                        | 18,132     | 100 | 9,229                   | 100   | 8,903                  | 100   |                      |                      |         |
| <b>Small for gestational age (&lt;10<sup>th</sup> population percentile)</b> |                        |            |     |                         |       |                        |       |                      |                      |         |
| Yes                                                                          | 10                     | 2,381      | 13  | 641                     | 7.0   | 1,740                  | 20    | 0.36<br>(0.33, 0.39) | 0.35<br>(0.32, 0.39) | 48      |
| Total                                                                        |                        | 18,132     | 100 | 9,229                   | 100   | 8,903                  | 100   |                      |                      |         |
| <b>Severe neonatal morbidity</b>                                             |                        |            |     |                         |       |                        |       |                      |                      |         |
| <b>Among live births only</b>                                                |                        |            |     |                         |       |                        |       |                      |                      |         |
| Yes                                                                          | 5                      | 1,470      | 8.2 | 636                     | 6.9   | 834                    | 9.5   | 0.74<br>(0.67, 0.81) | 0.70<br>(0.63, 0.77) | 17      |
| Total                                                                        |                        | 17,978     | 100 | 9,169                   | 100   | 8,809                  | 100   |                      |                      |         |
| <b>Admission to SCN or NICU<sup>^</sup></b>                                  |                        |            |     |                         |       |                        |       |                      |                      |         |
| Yes                                                                          | 15                     | 3,957      | 22  | 1,645                   | 18    | 2,312                  | 26    | 0.70<br>(0.66, 0.75) | 0.66<br>(0.63, 0.70) | 20      |
| Total                                                                        |                        | 17,809     | 100 | 9,059                   | 100   | 8,750                  | 100   |                      |                      |         |
| <b>Perinatal death</b>                                                       |                        |            |     |                         |       |                        |       |                      |                      |         |
| <b>Rate per 1,000 total births</b>                                           |                        |            |     |                         |       |                        |       |                      |                      |         |
| Yes                                                                          | 8                      | 254        | 14  | 92                      | 10**  | 162                    | 18**  | 0.54<br>(0.42, 0.70) | 0.58<br>(0.44, 0.76) | 27      |
| Stillborn                                                                    | 6                      | 162        |     | 60                      | 6.5** | 102                    | 11**  | 0.57<br>(0.41, 0.78) | 0.60<br>(0.43, 0.84) | 20      |
| <b>Rate per 1,000 live births</b>                                            |                        |            |     |                         |       |                        |       |                      |                      |         |
| Neonatal death                                                               | 2                      | 92         |     | 32                      | 3.5^^ | 60                     | 6.8^^ | 0.50<br>(0.33, 0.78) | 0.54<br>(0.34, 0.86) | 30      |



1  
2  
3  
4  
5  
6  
7  
8  
9  
10  
11  
12  
13  
14  
15  
16  
17  
18  
19  
20  
21  
22  
23  
24  
25  
26  
27  
28  
29  
30  
31  
32  
33  
34  
35  
36  
37  
38  
39  
40  
41  
42  
43  
44  
45  
46  
47

\*adjusted for maternal age, any hypertension, any diabetes, parity and socio-economic status (SEIFA).  
^Admission to Special Care Nursery (SCN) or Neonatal Intensive Care Unit (NICU) was restricted to those babies recorded as being born in a hospital of maternity service level 3 or higher or a private hospital.  
\*\*Rate per 1,000 total births  
^^ Rate per 1,000 live births  
PAF, Population Attributable Fraction

For peer review only



Figure 1 Flow diagram of mothers and babies eligible for inclusion in the final study population.

STROBE Statement—Checklist of items that should be included in reports of *cohort studies*  
**Manuscript for: Benefits of not smoking during pregnancy for Australian Aboriginal and Torres Strait Islander women and their babies: a retrospective cohort study using linked data**

|                           | Item No | Recommendation                                                                                                                                                                                    | Page No     |
|---------------------------|---------|---------------------------------------------------------------------------------------------------------------------------------------------------------------------------------------------------|-------------|
| <b>Title and abstract</b> | 1       | (a) Indicate the study's design with a commonly used term in the title or the abstract                                                                                                            | 1           |
|                           |         | (b) Provide in the abstract an informative and balanced summary of what was done and what was found                                                                                               | 1           |
| <b>Introduction</b>       |         |                                                                                                                                                                                                   |             |
| Background/rationale      | 2       | Explain the scientific background and rationale for the investigation being reported                                                                                                              | 2           |
| Objectives                | 3       | State specific objectives, including any prespecified hypotheses                                                                                                                                  | 2           |
| <b>Methods</b>            |         |                                                                                                                                                                                                   |             |
| Study design              | 4       | Present key elements of study design early in the paper                                                                                                                                           | 2           |
| Setting                   | 5       | Describe the setting, locations, and relevant dates, including periods of recruitment, exposure, follow-up, and data collection                                                                   | 2           |
| Participants              | 6       | (a) Give the eligibility criteria, and the sources and methods of selection of participants. Describe methods of follow-up                                                                        | 2-3         |
|                           |         | (b) For matched studies, give matching criteria and number of exposed and unexposed                                                                                                               | 2-3         |
| Variables                 | 7       | Clearly define all outcomes, exposures, predictors, potential confounders, and effect modifiers. Give diagnostic criteria, if applicable                                                          | 3-4         |
| Data sources/measurement  | 8*      | For each variable of interest, give sources of data and details of methods of assessment (measurement). Describe comparability of assessment methods if there is more than one group              | 3-4         |
| Bias                      | 9       | Describe any efforts to address potential sources of bias                                                                                                                                         | 4           |
| Study size                | 10      | Explain how the study size was arrived at                                                                                                                                                         | 2           |
| Quantitative variables    | 11      | Explain how quantitative variables were handled in the analyses. If applicable, describe which groupings were chosen and why                                                                      | 4           |
| Statistical methods       | 12      | (a) Describe all statistical methods, including those used to control for confounding                                                                                                             | 4-5         |
|                           |         | (b) Describe any methods used to examine subgroups and interactions                                                                                                                               |             |
|                           |         | (c) Explain how missing data were addressed                                                                                                                                                       | 5           |
|                           |         | (d) If applicable, explain how loss to follow-up was addressed                                                                                                                                    |             |
|                           |         | (e) Describe any sensitivity analyses                                                                                                                                                             |             |
| <b>Results</b>            |         |                                                                                                                                                                                                   |             |
| Participants              | 13*     | (a) Report numbers of individuals at each stage of study—eg numbers potentially eligible, examined for eligibility, confirmed eligible, included in the study, completing follow-up, and analysed | Fig 1       |
|                           |         | (b) Give reasons for non-participation at each stage                                                                                                                                              | Fig 1       |
|                           |         | (c) Consider use of a flow diagram                                                                                                                                                                | Fig 1       |
| Descriptive data          | 14*     | (a) Give characteristics of study participants (eg demographic, clinical, social) and information on exposures and potential confounders                                                          | Table 1     |
|                           |         | (b) Indicate number of participants with missing data for each variable of interest                                                                                                               | Table 1,2,3 |
|                           |         | (c) Summarise follow-up time (eg, average and total amount)                                                                                                                                       |             |
| Outcome data              | 15*     | Report numbers of outcome events or summary measures over time                                                                                                                                    | Table       |

2,3

|    |                          |    |                                                                                                                                                                                                              |
|----|--------------------------|----|--------------------------------------------------------------------------------------------------------------------------------------------------------------------------------------------------------------|
| 1  |                          |    | 2,3                                                                                                                                                                                                          |
| 2  |                          |    |                                                                                                                                                                                                              |
| 3  | Main results             | 16 | (a) Give unadjusted estimates and, if applicable, confounder-adjusted estimates and their precision (eg, 95% confidence interval). Make clear which confounders were adjusted for and why they were included |
| 4  |                          |    | Table                                                                                                                                                                                                        |
| 5  |                          |    | 2,3                                                                                                                                                                                                          |
| 6  |                          |    |                                                                                                                                                                                                              |
| 7  |                          |    |                                                                                                                                                                                                              |
| 8  |                          |    |                                                                                                                                                                                                              |
| 9  |                          |    |                                                                                                                                                                                                              |
| 10 |                          |    |                                                                                                                                                                                                              |
| 11 | Other analyses           | 17 | Report other analyses done—eg analyses of subgroups and interactions, and sensitivity analyses                                                                                                               |
| 12 |                          |    |                                                                                                                                                                                                              |
| 13 |                          |    |                                                                                                                                                                                                              |
| 14 | <b>Discussion</b>        |    |                                                                                                                                                                                                              |
| 15 | Key results              | 18 | Summarise key results with reference to study objectives                                                                                                                                                     |
| 16 |                          |    | 6                                                                                                                                                                                                            |
| 17 | Limitations              | 19 | Discuss limitations of the study, taking into account sources of potential bias or imprecision. Discuss both direction and magnitude of any potential bias                                                   |
| 18 |                          |    | 8                                                                                                                                                                                                            |
| 19 |                          |    |                                                                                                                                                                                                              |
| 20 | Interpretation           | 20 | Give a cautious overall interpretation of results considering objectives, limitations, multiplicity of analyses, results from similar studies, and other relevant evidence                                   |
| 21 |                          |    | 6,7                                                                                                                                                                                                          |
| 22 |                          |    |                                                                                                                                                                                                              |
| 23 |                          |    |                                                                                                                                                                                                              |
| 24 | Generalisability         | 21 | Discuss the generalisability (external validity) of the study results                                                                                                                                        |
| 25 |                          |    | 8                                                                                                                                                                                                            |
| 26 | <b>Other information</b> |    |                                                                                                                                                                                                              |
| 27 | Funding                  | 22 | Give the source of funding and the role of the funders for the present study and, if applicable, for the original study on which the present article is based                                                |
| 28 |                          |    | 10                                                                                                                                                                                                           |
| 29 |                          |    |                                                                                                                                                                                                              |
| 30 |                          |    |                                                                                                                                                                                                              |

\*Give information separately for exposed and unexposed groups.

**Note:** An Explanation and Elaboration article discusses each checklist item and gives methodological background and published examples of transparent reporting. The STROBE checklist is best used in conjunction with this article (freely available on the Web sites of PLoS Medicine at <http://www.plosmedicine.org/>, Annals of Internal Medicine at <http://www.annals.org/>, and Epidemiology at <http://www.epidem.com/>). Information on the STROBE Initiative is available at <http://www.strobe-statement.org>.
